# Supplementary material for: Effect of Chirality on the Binding of Viologen Guests in Porphyrin Macrocycles
Source: PubMed Central journal article supplement (PMC6582502; doi:10.1002/ejoc.201900221), 2019-05-03
Supplement: EJOC-2019-3525-s001.pdf [file EJOC-2019-3525-s001.pdf]

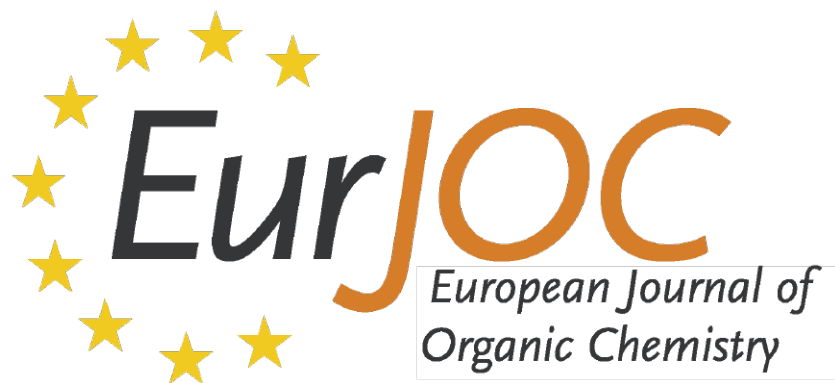

## Supporting Information

### **Effect of Chirality on the Binding of Viologen Guests in Porphyrin Macrocycles**

Shaji Varghese, Bram Spierenburg, Jeroen P. J. Bruekers,  
Anne Swartjes, Paul B. White, Johannes A. A. W. Elemans,\*  
and Roeland J. M. Nolte\*

[ejoc201900221-sup-0001-SupMat.pdf](#)

## Table of contents

|                  |     |
|------------------|-----|
| Table S1 .....   | S5  |
| Table S2 .....   | S6  |
| Table S3 .....   | S8  |
| Table S4 .....   | S10 |
| Table S5.....    | S11 |
| Figure S1 .....  | S12 |
| Figure S2 .....  | S13 |
| Figure S3 .....  | S14 |
| Figure S4 .....  | S15 |
| Figure S5 .....  | S16 |
| Figure S6 .....  | S17 |
| Figure S7 .....  | S18 |
| Figure S8 .....  | S19 |
| Figure S9 .....  | S20 |
| Figure S10 ..... | S21 |
| Figure S11 ..... | S22 |
| Figure S12 ..... | S23 |
| Figure S13 ..... | S24 |
| Figure S14 ..... | S25 |
| Figure S15 ..... | S26 |

|                  |     |
|------------------|-----|
| Figure S16 ..... | S27 |
| Figure S17 ..... | S28 |
| Figure S18 ..... | S29 |
| Figure S19 ..... | S30 |
| Figure S20 ..... | S31 |
| Figure S21 ..... | S32 |
| Figure S22 ..... | S33 |
| Figure S23 ..... | S34 |
| Figure S24 ..... | S35 |
| Figure S25 ..... | S36 |
| Figure S26.....  | S37 |
| Figure S27.....  | S38 |
| Figure S28.....  | S39 |
| Figure S29.....  | S40 |
| Figure S30.....  | S41 |
| Figure S31.....  | S42 |
| Figure S32.....  | S43 |
| Figure S33.....  | S44 |
| Figure S34.....  | S45 |
| Figure S35.....  | S46 |
| Figure S36.....  | S47 |
| Figure S37.....  | S48 |

|                 |     |
|-----------------|-----|
| Figure S38..... | S49 |
| Figure S39..... | S50 |
| Figure S40..... | S51 |
| Figure S41..... | S52 |
| Figure S42..... | S53 |
| Figure S43..... | S54 |
| Figure S44..... | S55 |
| Figure S45..... | S56 |
| Figure S46..... | S57 |
| Figure S47..... | S58 |
| Figure S48..... | S59 |
| Figure S49..... | S60 |
| Figure S50..... | S61 |
| Figure S51..... | S62 |
| Figure S52..... | S63 |
| Figure S53..... | S64 |
| Figure S54..... | S65 |
| Figure S55..... | S66 |
| Figure S56..... | S67 |
| Figure S57..... | S68 |
| Figure S58..... | S69 |
| Figure S59..... | S70 |

|                  |     |
|------------------|-----|
| Figure S60.....  | S71 |
| Figure S61.....  | S72 |
| Figure S62.....  | S73 |
| Figure S63.....  | S74 |
| Figure S64.....  | S75 |
| Figure S65.....  | S76 |
| Figure S66.....  | S77 |
| Figure S67.....  | S78 |
| Figure S68.....  | S79 |
| Figure S69.....  | S80 |
| Figure S70.....  | S81 |
| Figure S71.....  | S82 |
| Figure S72 ..... | S83 |
| Figure S73.....  | S84 |
| Figure S74.....  | S85 |
| Figure S75.....  | S86 |
| Figure S76.....  | S87 |
| Figure S77.....  | S88 |

Table S1. Selected CISVs for protons in the complexes of (*R,S<sub>p</sub>*\*)-**H<sub>2</sub>4** and (*R,R<sub>p</sub>*\*)-**H<sub>2</sub>5** with guest **V1**.<sup>[a]</sup>

| Host                                              | <i>NH</i> | <i>28a</i>             | <i>28b</i>            | <i>30</i>                 | <i>49</i> | <i>53</i> |
|---------------------------------------------------|-----------|------------------------|-----------------------|---------------------------|-----------|-----------|
| <i>(R,S<sub>p</sub></i> *)- <b>H<sub>2</sub>4</b> | -0.09     | -0.21 (I) -0.16 (II)   | -0.26 (I) -0.24 (II)  | +0.02 (I)                 | +0.24     | +0.17     |
|                                                   |           | -0.38 (III) -0.11 (IV) | -1.01 (III) -1.12(IV) | -0.18 (III)<br>-0.29 (IV) |           |           |
| <i>(R,R<sub>p</sub></i> *)- <b>H<sub>2</sub>5</b> | -0.07     | -0.47 (I) -0.23 (II)   | -0.30 (I) -0.44 (II)  | 0.00 (II)                 | +0.94     | +0.14     |
|                                                   |           | -0.09 (III) -0.38 (IV) | -0.98 (III) -0.93(IV) | -0.22 (III)<br>-0.16 (IV) |           |           |

[a] The roman numbers in brackets refer to the locations of the protons in the complexes, i.e. below the respective porphyrin meso-phenyl rings.

Table S2. CISVs for protons in complexes between (*R,S<sub>p</sub>*\*)-H<sub>2</sub>4 and the guests (*R,R*)-V2 and (*S,S*)-V2<sup>[a]</sup>

| Proton        | Guest<br>δ [ppm] | ( <i>R,S<sub>p</sub></i> *)-H <sub>2</sub> 4<br>δ [ppm] | ( <i>R,S<sub>p</sub></i> *)-H <sub>2</sub> 4 + ( <i>R,R</i> )-V2<br>δ [ppm] | ( <i>R,S<sub>p</sub></i> *)-H <sub>2</sub> 4 + ( <i>R,R</i> )-V2<br>CISV [ppm] | ( <i>R,S<sub>p</sub></i> *)-H <sub>2</sub> 4 + ( <i>S,S</i> )-V2<br>δ [ppm] | ( <i>R,S<sub>p</sub></i> *)-H <sub>2</sub> 4 + ( <i>S,S</i> )-V2<br>CISV [ppm] |
|---------------|------------------|---------------------------------------------------------|-----------------------------------------------------------------------------|--------------------------------------------------------------------------------|-----------------------------------------------------------------------------|--------------------------------------------------------------------------------|
| <i>Pyr NH</i> |                  | -2.76                                                   | -2.81                                                                       | -0.05                                                                          | -2.81                                                                       | -0.05                                                                          |
| 3, 4          | -----            | 8.82, 8.96                                              | 9.15, 9.29                                                                  | +0.33,<br>+0.33                                                                | 9.13, 9.32                                                                  | +0.31,<br>+0.36                                                                |
| 8, 9          |                  | 8.78/8.68/8.                                            | 8.86/8.79                                                                   | ~+0.1                                                                          | 8.87, 8.79                                                                  | ~+0.1                                                                          |
| 13, 14        |                  | 66/ 8.61                                                | 9.18/9.14                                                                   | ~+0.5                                                                          | 9.21/9.15                                                                   | ~+0.5                                                                          |
| 18, 19        |                  |                                                         | 8.86/8.79                                                                   | ~+0.1                                                                          | 8.87/8.76                                                                   | ~+0.1                                                                          |
| 27(I)a        |                  | 4.16                                                    | 4.16                                                                        | 0                                                                              | 4.16                                                                        | 0                                                                              |
| 27(II)a       |                  | 4.14                                                    | 3.77                                                                        | -0.37                                                                          | 3.81                                                                        | -0.33                                                                          |
| 27(III)a      |                  | 3.93                                                    | 4.29                                                                        | +0.36                                                                          | 4.26                                                                        | +0.33                                                                          |
| 27(IV)a       |                  | 4.06                                                    | 4.28                                                                        | +0.22                                                                          | 4.26                                                                        | +0.20                                                                          |
| 27(I)b        |                  | 3.71                                                    | 4.02                                                                        | +0.31                                                                          | 4.03                                                                        | +0.32                                                                          |
| 27(II)b       |                  | 3.60                                                    | 3.58                                                                        | -0.02                                                                          | 3.64                                                                        | +0.04                                                                          |
| 27(III)b      |                  | 3.83                                                    | 4.05                                                                        | +0.22                                                                          | 4.00                                                                        | +0.17                                                                          |
| 27(IV)b       |                  | 3.67                                                    | 4.05                                                                        | +0.38                                                                          | 4.02                                                                        | +0.35                                                                          |
| 28(I)a        |                  | 3.65                                                    | 3.35                                                                        | -0.30                                                                          | 3.34                                                                        | -0.31                                                                          |
| 28(II)a       |                  | 3.82                                                    | 3.33                                                                        | -0.49                                                                          | 3.35                                                                        | -0.47                                                                          |
| 28 (III)a     |                  | 3.70                                                    | 3.36                                                                        | -0.34                                                                          | 3.35                                                                        | -0.35                                                                          |
| 28(IV)a       |                  | 3.42                                                    | 3.36                                                                        | -0.06                                                                          | 3.35                                                                        | -0.07                                                                          |
| 28(I)b        |                  | 3.22                                                    | 2.79                                                                        | -0.43                                                                          | 2.90                                                                        | -0.32                                                                          |
| 28(II)b       |                  | 3.33                                                    | 3.06                                                                        | -0.27                                                                          | 3.12                                                                        | -0.21                                                                          |
| 28 (III)b     |                  | 3.22                                                    | 2.66                                                                        | -0.56                                                                          | 2.51                                                                        | -0.71                                                                          |
| 28(IV)b       |                  | 3.22                                                    | 2.46                                                                        | -0.76                                                                          | 2.31                                                                        | -0.91                                                                          |
| 30(I)         |                  | 6.05                                                    | 5.88                                                                        | -0.17                                                                          | 5.93                                                                        | -0.12                                                                          |
| 30(III)       |                  | 6.21                                                    | 6.07                                                                        | -0.14                                                                          | 6.04                                                                        | -0.17                                                                          |
| 30(IV)        |                  | 6.22                                                    | 6.08                                                                        | -0.14                                                                          | 6.09                                                                        | -0.13                                                                          |
| 32(I)a        |                  | 4.16                                                    | 4.24                                                                        | +0.08                                                                          | 4.24                                                                        | -0.08                                                                          |
| 32(II)a       |                  | 4.32                                                    | 4.27                                                                        | -0.05                                                                          | 4.28                                                                        | -0.04                                                                          |
| 32(III)a      |                  | 4.26                                                    | 4.38                                                                        | +0.12                                                                          | 4.39                                                                        | +0.13                                                                          |
| 32(IV)a       |                  | 4.13                                                    | 4.24                                                                        | +0.11                                                                          | 4.26                                                                        | +0.13                                                                          |
| 32(I)b        |                  | 3.72                                                    | 3.87                                                                        | +0.15                                                                          | 3.87                                                                        | +0.15                                                                          |
| 32(II)b       |                  | 3.58                                                    | 3.68                                                                        | +0.10                                                                          | 3.70                                                                        | +0.12                                                                          |
| 32 (III)b     |                  | 3.80                                                    | 3.90                                                                        | +0.10                                                                          | 3.90                                                                        | +0.10                                                                          |
| 32(IV)b       |                  | 3.70                                                    | 3.83                                                                        | +0.13                                                                          | 3.84                                                                        | +0.14                                                                          |
| NH 49         |                  | 8.98                                                    | 9.05                                                                        | +0.07                                                                          | 9.29                                                                        | +0.31                                                                          |
| 53            |                  | 3.26                                                    | 3.34                                                                        | +0.08                                                                          | 3.28                                                                        | +0.02                                                                          |
| V1a,b in      | 4.66, 4.61       |                                                         | 2.91,2.28                                                                   | -1.75,-2.33                                                                    | 3.20, 2.41                                                                  | -1.46, -2.20                                                                   |
| V1a,b out     | 4.66, 4.61       |                                                         | 4.15,4.05                                                                   | -0.51, -0.56                                                                   | 4.36, 4.31                                                                  | -0.30, -0.30                                                                   |
| V2a,b in      | 2.04, 1.86       |                                                         | 0.71, 0.39                                                                  | -1.33, -1.47                                                                   | -0.03, 0.47                                                                 | -2.07, -1.39                                                                   |
| V2a,b out     | 2.04, 1.86       |                                                         | 1.41, 1.34                                                                  | -0.63, -0.52                                                                   | 1.67, 1.51                                                                  | -0.37, -0.35                                                                   |
| V3 in         | 1.60             |                                                         | 1.18                                                                        | -0.42                                                                          | 1.00                                                                        | -0.60                                                                          |
| V3 out        | 1.60             |                                                         | 1.47                                                                        | -0.13                                                                          | 1.50                                                                        | -0.10                                                                          |
| V4 in         | 1.02             |                                                         | 0.76                                                                        | -0.26                                                                          | 0.69                                                                        | -0.33                                                                          |

|                |      |      |       |      |       |
|----------------|------|------|-------|------|-------|
| <i>V4 out</i>  | 1.02 | 0.98 | -0.04 | 1.02 | 0     |
| <i>V10 in</i>  | 8.93 | 5.21 | -3.72 | 4.53 | -4.40 |
| <i>V10 out</i> | 8.93 | 7.36 | -1.57 | 7.88 | -1.05 |
| <i>V11 in</i>  | 8.41 | 3.51 | -4.90 | 3.34 | -5.07 |
| <i>V11 out</i> | 8.41 | 4.93 | -3.48 | 5.46 | -2.95 |

[a] Protons indicated with a 'V' belong to the guest molecule. A slash indicates that it is uncertain which signal belongs to which proton. A comma is used to indicate that proton signals belong to the respective protons. CISVs provided with an '~' are uncertain due to uncertain proton assignment. The notation 'in' refers to the guest proton on the same side as the Mosher amide moiety and the notation 'out' to the guest proton on the other side as the Mosher amide moiety.



Table S3. CISVs for protons in complexes between (*R,R*,\*)-H<sub>2</sub>5 and guests (*R,R*)-V2 and (*S,S*)-V2<sup>[a]</sup>

| Proton        | Guest<br>δ [ppm] | ( <i>R,R</i> ,*)-H <sub>2</sub> 5<br>δ [ppm] | ( <i>R,R</i> ,*)-H <sub>2</sub> 5 + <i>R,R</i> -Guest<br>δ [ppm] | <i>R,R</i> -Guest<br>CISV [ppm] | ( <i>R,R</i> ,*)-H <sub>2</sub> 5 + ( <i>S,S</i> )-Guest<br>δ [ppm] | ( <i>S,S</i> )-Guest<br>CISV [ppm] |
|---------------|------------------|----------------------------------------------|------------------------------------------------------------------|---------------------------------|---------------------------------------------------------------------|------------------------------------|
| <i>Pyr NH</i> |                  | -2.69                                        | -2.83                                                            | -0.14                           | -2.84                                                               | -0.15                              |
| 3, 4          | -----            |                                              | 9.20/9.03                                                        | ~+0.5                           | 9.19/9.04                                                           | ~+ 0.5                             |
| 8, 9          |                  | 8.81-8.70/                                   | 8.83/8.76                                                        | ~+0.1                           | 8.83/8.78                                                           | ~+0.1                              |
| 13, 14        |                  | 8.65/8.61                                    | 9.21/9.13                                                        | ~+0.5                           | 9.19/9.12                                                           | ~+0.5                              |
| 18, 19        |                  |                                              | 8.80, 8.90                                                       | ~+0.1                           | 8.80, 8.91                                                          | ~+0.1                              |
| 27(I)a        |                  | 4.46                                         | 4.28                                                             | -0.18                           | 4.31                                                                | -0.15                              |
| 27(II)a       |                  | 4.18                                         | 4.16                                                             | -0.02                           | 4.18                                                                | 0                                  |
| 27(III)a      |                  | 4.12                                         | 4.28                                                             | +0.16                           | 4.32                                                                | +0.20                              |
| 27(IV)a       |                  | 4.06                                         | 4.26                                                             | +0.20                           | 4.32                                                                | +0.26                              |
| 27(I)b        |                  | 4.05                                         | 3.93                                                             | -0.12                           | 3.93                                                                | -0.12                              |
| 27(II)b       |                  | 4.06                                         | 4.02                                                             | -0.04                           | 4.03                                                                | -0.03                              |
| 27(III)b      |                  | 4.03                                         | 4.01                                                             | -0.02                           | 4.05                                                                | +0.02                              |
| 27(IV)b       |                  | 3.92                                         | 4.00                                                             | +0.08                           | 4.05                                                                | +0.13                              |
| 28(I)a        |                  | 3.96                                         | 3.35                                                             | -0.61                           | 3.38                                                                | -0.58                              |
| 28(II)a       |                  | 3.66                                         | 3.36                                                             | -0.30                           | 3.38                                                                | -0.28                              |
| 28 (III)a     |                  | 3.37                                         | 3.34                                                             | -0.03                           | 3.38                                                                | +0.01                              |
| 28(IV)a       |                  | 3.75                                         | 3.36                                                             | -0.39                           | 3.38                                                                | -0.37                              |
| 28(I)b        |                  | 3.47                                         | 3.18                                                             | -0.29                           | 3.18                                                                | -0.29                              |
| 28(II)b       |                  | 3.31                                         | 2.92                                                             | -0.39                           | 2.86                                                                | -0.45                              |
| 28 (III)b     |                  | 3.18                                         | 2.35                                                             | -0.83                           | 2.52                                                                | -0.66                              |
| 28(IV)b       |                  | 3.21                                         | 2.52                                                             | -0.69                           | 2.68                                                                | -0.53                              |
| 30(II)        |                  | 6.11                                         | 5.96                                                             | -0.15                           | 5.96                                                                | -0.15                              |
| 30(III)       |                  | 6.18                                         | 6.07                                                             | -0.11                           | 6.10                                                                | -0.08                              |
| 30(IV)        |                  | 6.22                                         | 6.04                                                             | -0.18                           | 6.11                                                                | -0.11                              |
| 32(I)a        |                  | 3.67                                         | 4.27                                                             | +0.60                           | 4.25                                                                | +0.58                              |
| 32(II)a       |                  | 4.08                                         | 4.25                                                             | +0.17                           | 4.26                                                                | +0.18                              |
| 32(III)a      |                  | 4.12                                         | 4.26                                                             | +0.14                           | 4.26                                                                | +0.14                              |
| 32(IV)a       |                  | 4.21                                         | 4.38                                                             | +0.17                           | 4.39                                                                | +0.18                              |
| 32(I)b        |                  | 3.28                                         | 3.75                                                             | +0.47                           | 3.72                                                                | +0.44                              |
| 32(II)b       |                  | 3.67                                         | 3.87                                                             | +0.20                           | 3.86                                                                | +0.19                              |
| 32 (III)b     |                  | 3.66                                         | 3.83                                                             | +0.17                           | 3.82                                                                | +0.16                              |
| 32(IV)b       |                  | 3.68                                         | 3.89                                                             | +0.21                           | 3.88                                                                | +0.20                              |
| NH 49         |                  | 8.07                                         | 9.31                                                             | +1.24                           | 9.18                                                                | +1.11                              |
| 53            |                  | 3.22                                         | 3.27                                                             | +0.05                           | 3.29                                                                | +0.07                              |
| V1a,b in      | 4.66, 4.61       |                                              | 3.44, 2.66                                                       | -1.22, -1.95                    | 3.09, 3.56                                                          | -1.57, -1.05                       |
| V1a,b out     | 4.66, 4.61       |                                              | 4.22, 4.17                                                       | -0.44, -0.44                    | 4.03, 3.94                                                          | -0.63, -0.67                       |
| V2a,b in      | 2.04, 1.86       |                                              | 0.10, 0.62                                                       | -1.94, -1.24                    | 0.90, 0.49                                                          | -1.14, -1.37                       |
| V2a,b out     | 2.04, 1.86       |                                              | 1.59, 1.45                                                       | -0.45, -0.41                    | 1.35, 1.29                                                          | -0.69, -0.57                       |
| V3 in         | 1.60             |                                              | 1.17                                                             | -0.43                           | 1.32                                                                | -0.28                              |
| V3 out        | 1.60             |                                              | 1.50                                                             | -0.10                           | 1.47                                                                | -0.13                              |
| V4 in         | 1.02             |                                              | 0.86                                                             | -0.16                           | 0.84                                                                | -0.18                              |

|                |      |      |       |      |       |
|----------------|------|------|-------|------|-------|
| <i>V4 out</i>  | 1.02 | 1.00 | -0.02 | 0.98 | -0.04 |
| <i>V10 in</i>  | 8.93 | 4.94 | -3.99 | 5.52 | -3.41 |
| <i>V10 out</i> | 8.93 | 7.63 | -1.30 | 7.17 | -1.76 |
| <i>V11 in</i>  | 8.41 | 3.37 | -5.04 | 3.69 | -4.72 |
| <i>V11 out</i> | 8.41 | 5.14 | -3.27 | 4.76 | -3.65 |

[a] Protons indicated with a 'V' belong to the guest molecule. A slash indicates that it is uncertain which signal belongs to which proton. A comma is used to indicate that proton signals belong to the respective protons. CISVs provided with an '~' are uncertain due to uncertain proton assignment. The notation 'in' refers to the guest proton on the same side as the Mosher amide moiety and the notation 'out' to the guest proton on the other side as the Mosher amide moiety.

Table S4. Association constants of complexes between (*R,S*<sub>p</sub>\*)-**H**<sub>2</sub>**4** and **V1** and **V2**.

| Host                                                                     | Guest     | K [M <sup>-1</sup> ]                           | Fit error [%] | URL                                                                                                                                                                           |
|--------------------------------------------------------------------------|-----------|------------------------------------------------|---------------|-------------------------------------------------------------------------------------------------------------------------------------------------------------------------------|
| ( <i>R,S</i> <sub>p</sub> *)- <b>H</b> <sub>2</sub> <b>4</b>             | <b>V1</b> | 9.78 * 10 <sup>5</sup>                         | 6             | <a href="http://app.supramolecular.org/bindfit/view/1e95e65f-a5a7-48c2-b1a9-b2228b41d174">http://app.supramolecular.org/bindfit/view/1e95e65f-a5a7-48c2-b1a9-b2228b41d174</a> |
| ( <i>R,S</i> <sub>p</sub> *)- <b>H</b> <sub>2</sub> <b>4</b>             | <b>V1</b> | 8.02 * 10 <sup>5</sup>                         | 1             | <a href="http://app.supramolecular.org/bindfit/view/08e82184-b858-491e-bced-90892ab9f0c5">http://app.supramolecular.org/bindfit/view/08e82184-b858-491e-bced-90892ab9f0c5</a> |
| ( <i>R,S</i> <sub>p</sub> *)- <b>H</b> <sub>2</sub> <b>4</b>             | <b>V1</b> | 8.69 * 10 <sup>5</sup>                         | 2             | <a href="http://app.supramolecular.org/bindfit/view/8c3ca7c7-f3df-4fec-9850-4feee77a54eb">http://app.supramolecular.org/bindfit/view/8c3ca7c7-f3df-4fec-9850-4feee77a54eb</a> |
| Average for ( <i>R,S</i> <sub>p</sub> *)- <b>H</b> <sub>2</sub> <b>4</b> | <b>V1</b> | 8.83 * 10 <sup>5</sup> ± 8.9 * 10 <sup>4</sup> |               |                                                                                                                                                                               |

  

| Host                                                                     | Guest                     | K [M <sup>-1</sup> ]                            | Fit error [%] | URL                                                                                                                                                                           |
|--------------------------------------------------------------------------|---------------------------|-------------------------------------------------|---------------|-------------------------------------------------------------------------------------------------------------------------------------------------------------------------------|
| ( <i>R,S</i> <sub>p</sub> *)- <b>H</b> <sub>2</sub> <b>4</b>             | ( <i>R,R</i> )- <b>V2</b> | 1.337 * 10 <sup>6</sup>                         | 6             | <a href="http://app.supramolecular.org/bindfit/view/5d2c0483-2c08-42e7-aaad-75185712a5d4">http://app.supramolecular.org/bindfit/view/5d2c0483-2c08-42e7-aaad-75185712a5d4</a> |
| ( <i>R,S</i> <sub>p</sub> *)- <b>H</b> <sub>2</sub> <b>4</b>             | ( <i>R,R</i> )- <b>V2</b> | 1.412 * 10 <sup>6</sup>                         | 8             | <a href="http://app.supramolecular.org/bindfit/view/ed8296fb-4279-433e-b046-59aee7708e04">http://app.supramolecular.org/bindfit/view/ed8296fb-4279-433e-b046-59aee7708e04</a> |
| ( <i>R,S</i> <sub>p</sub> *)- <b>H</b> <sub>2</sub> <b>4</b>             | ( <i>R,R</i> )- <b>V2</b> | 1.418 * 10 <sup>6</sup>                         | 6             | <a href="http://app.supramolecular.org/bindfit/view/a8996a07-84d2-461e-a8f1-0d4701a0430d">http://app.supramolecular.org/bindfit/view/a8996a07-84d2-461e-a8f1-0d4701a0430d</a> |
| Average for ( <i>R,S</i> <sub>p</sub> *)- <b>H</b> <sub>2</sub> <b>4</b> | ( <i>R,R</i> )- <b>V2</b> | 1.388 * 10 <sup>6</sup> ± 4.5 * 10 <sup>4</sup> |               |                                                                                                                                                                               |

  

| Host                                                                     | Guest                     | K [M <sup>-1</sup> ]                           | Fit error [%] | URL                                                                                                                                                                           |
|--------------------------------------------------------------------------|---------------------------|------------------------------------------------|---------------|-------------------------------------------------------------------------------------------------------------------------------------------------------------------------------|
| ( <i>R,S</i> <sub>p</sub> *)- <b>H</b> <sub>2</sub> <b>4</b>             | ( <i>S,S</i> )- <b>V2</b> | 3.73 * 10 <sup>6</sup>                         | 17            | <a href="http://app.supramolecular.org/bindfit/view/759b066d-3afc-4f9b-bb86-fae00abd3a83">http://app.supramolecular.org/bindfit/view/759b066d-3afc-4f9b-bb86-fae00abd3a83</a> |
| ( <i>R,S</i> <sub>p</sub> *)- <b>H</b> <sub>2</sub> <b>4</b>             | ( <i>S,S</i> )- <b>V2</b> | 3.73 * 10 <sup>6</sup>                         | 20            | <a href="http://app.supramolecular.org/bindfit/view/c841de76-bd7b-4df2-a311-e68cfc35113b">http://app.supramolecular.org/bindfit/view/c841de76-bd7b-4df2-a311-e68cfc35113b</a> |
| ( <i>R,S</i> <sub>p</sub> *)- <b>H</b> <sub>2</sub> <b>4</b>             | ( <i>S,S</i> )- <b>V2</b> | 4.18 * 10 <sup>6</sup>                         | 26            | <a href="http://app.supramolecular.org/bindfit/view/673e6274-850b-44b5-a559-88028cff955e">http://app.supramolecular.org/bindfit/view/673e6274-850b-44b5-a559-88028cff955e</a> |
| Average for ( <i>R,S</i> <sub>p</sub> *)- <b>H</b> <sub>2</sub> <b>4</b> | ( <i>S,S</i> )- <b>V2</b> | 3.88 * 10 <sup>6</sup> ± 2.6 * 10 <sup>5</sup> |               |                                                                                                                                                                               |

Table S5. Association constants of complexes between  $(R,R_p^*)\text{-H}_2\mathbf{5}$  and guests **V1** and **V2**.<sup>[a]</sup>

| Host                                         | Guest     | K [M <sup>-1</sup> ]         | Fit error [%] | URL                                                                                                                                                                           |
|----------------------------------------------|-----------|------------------------------|---------------|-------------------------------------------------------------------------------------------------------------------------------------------------------------------------------|
| $(R,R_p^*)\text{-H}_2\mathbf{5}$             | <b>V1</b> | $1.04 * 10^6$                | 5             | <a href="http://app.supramolecular.org/bindfit/view/18219a74-b104-45f6-ba76-f56b82aaa112">http://app.supramolecular.org/bindfit/view/18219a74-b104-45f6-ba76-f56b82aaa112</a> |
| $(R,R_p^*)\text{-H}_2\mathbf{5}$             | <b>V1</b> | $1.42 * 10^6$                | 3             | <a href="http://app.supramolecular.org/bindfit/view/4bf485eb-5007-4ee4-a14f-6e37d768be94">http://app.supramolecular.org/bindfit/view/4bf485eb-5007-4ee4-a14f-6e37d768be94</a> |
| $(R,R_p^*)\text{-H}_2\mathbf{5}$             | <b>V1</b> | $1.40 * 10^6$                | 3             | <a href="http://app.supramolecular.org/bindfit/view/23f40633-656c-4061-a238-d2ec73924645">http://app.supramolecular.org/bindfit/view/23f40633-656c-4061-a238-d2ec73924645</a> |
| Average for $(R,R_p^*)\text{-H}_2\mathbf{5}$ | <b>V1</b> | $1.29 * 10^6 \pm 2.1 * 10^5$ |               |                                                                                                                                                                               |

  

| Host                                         | Guest             | K [M <sup>-1</sup> ]        | Fit error [%] | URL                                                                                                                                                                           |
|----------------------------------------------|-------------------|-----------------------------|---------------|-------------------------------------------------------------------------------------------------------------------------------------------------------------------------------|
| $(R,R_p^*)\text{-H}_2\mathbf{5}$             | $(R,R)\text{-V2}$ | $7.1 * 10^6$                | 18            | <a href="http://app.supramolecular.org/bindfit/view/3155f464-3fc5-4cd0-af0e-160047e1ff64">http://app.supramolecular.org/bindfit/view/3155f464-3fc5-4cd0-af0e-160047e1ff64</a> |
| $(R,R_p^*)\text{-H}_2\mathbf{5}$             | $(R,R)\text{-V2}$ | $2.1 * 10^7$                | 66            | <a href="http://app.supramolecular.org/bindfit/view/ecc71a2f-3a57-4ce0-ae38-57ae4abdd443">http://app.supramolecular.org/bindfit/view/ecc71a2f-3a57-4ce0-ae38-57ae4abdd443</a> |
| $(R,R_p^*)\text{-H}_2\mathbf{5}$             | $(R,R)\text{-V2}$ | $9.0 * 10^6$                | 34            | <a href="http://app.supramolecular.org/bindfit/view/59fc8613-9b40-4c43-979d-1afd74c9fd8f">http://app.supramolecular.org/bindfit/view/59fc8613-9b40-4c43-979d-1afd74c9fd8f</a> |
| Average for $(R,R_p^*)\text{-H}_2\mathbf{5}$ | $(R,R)\text{-V2}$ | $8.0 * 10^6 \pm 1.4 * 10^6$ |               |                                                                                                                                                                               |

  

| Host                                         | Guest             | K [M <sup>-1</sup> ]        | Fit error [%] | URL                                                                                                                                                                           |
|----------------------------------------------|-------------------|-----------------------------|---------------|-------------------------------------------------------------------------------------------------------------------------------------------------------------------------------|
| $(R,R_p^*)\text{-H}_2\mathbf{5}$             | $(S,S)\text{-V2}$ | $7.52 * 10^6$               | 20            | <a href="http://app.supramolecular.org/bindfit/view/d16144c9-2580-432d-9f0e-9ff4ab746d24">http://app.supramolecular.org/bindfit/view/d16144c9-2580-432d-9f0e-9ff4ab746d24</a> |
| $(R,R_p^*)\text{-H}_2\mathbf{5}$             | $(S,S)\text{-V2}$ | $7.00 * 10^6$               | 23            | <a href="http://app.supramolecular.org/bindfit/view/0316ba92-bef1-422c-86b8-d27631843a96">http://app.supramolecular.org/bindfit/view/0316ba92-bef1-422c-86b8-d27631843a96</a> |
| $(R,R_p^*)\text{-H}_2\mathbf{5}$             | $(S,S)\text{-V2}$ | $1.4 * 10^7$                | 63            | <a href="http://app.supramolecular.org/bindfit/view/3945be8a-cced-4099-b6e0-5d17c9a46187">http://app.supramolecular.org/bindfit/view/3945be8a-cced-4099-b6e0-5d17c9a46187</a> |
| Average for $(R,R_p^*)\text{-H}_2\mathbf{5}$ | $(S,S)\text{-V2}$ | $7.3 * 10^6 \pm 3.7 * 10^5$ |               |                                                                                                                                                                               |

<sup>[a]</sup> Data points with a too large fitting error (66 and 63 %) were omitted in the calculation of the final association constants

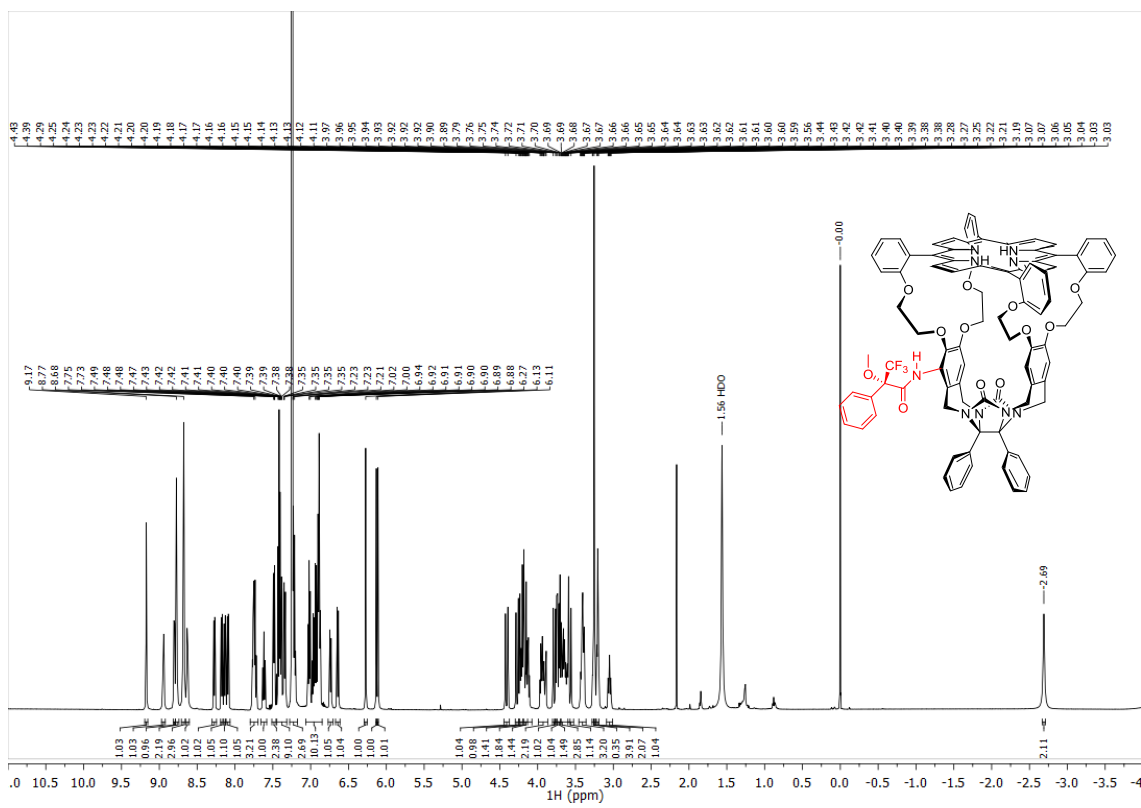

Figure S1.  $^1\text{H}$  NMR spectrum (500 MHz, 298 K) of  $(R,S_p^*)\text{-H}_2\mathbf{4}$  in  $\text{CDCl}_3$ .



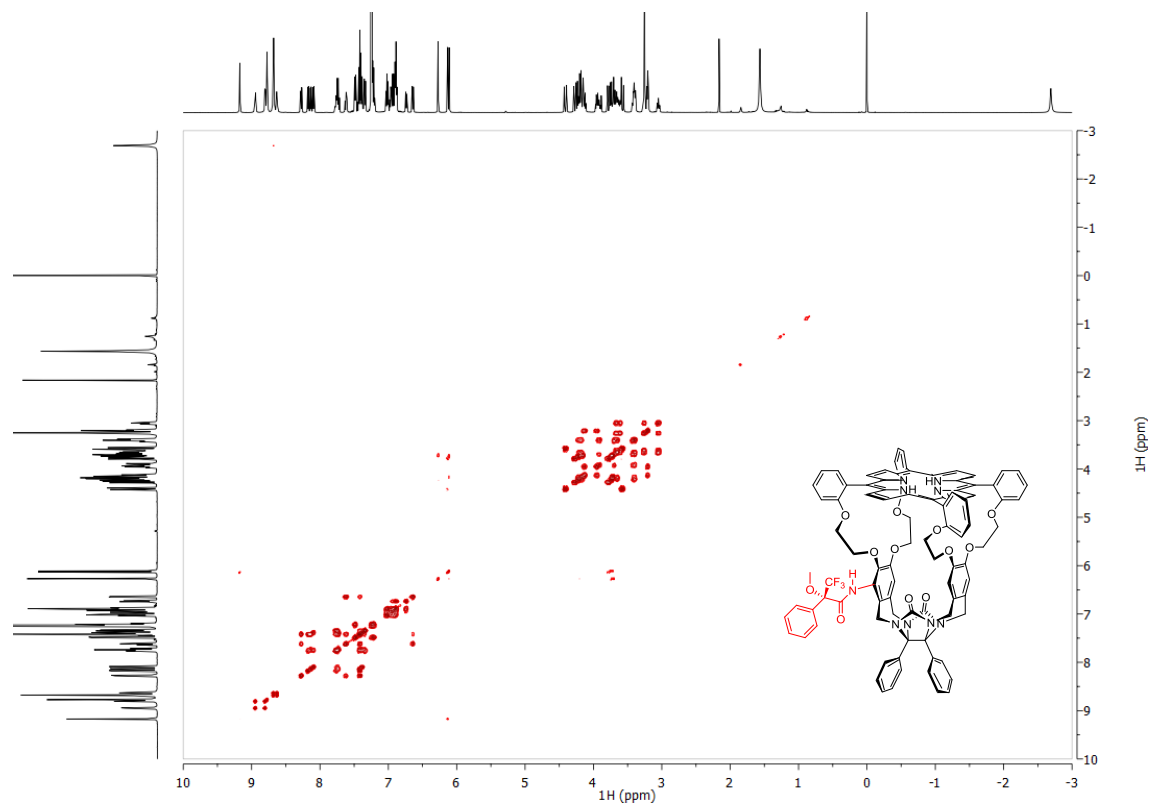

Figure S3.  $^1\text{H}$ - $^1\text{H}$  DQF-COSY NMR spectrum (500 MHz, 298 K) of  $(R,S_p^*)\text{-H}_2\text{4}$  in  $\text{CDCl}_3$ .

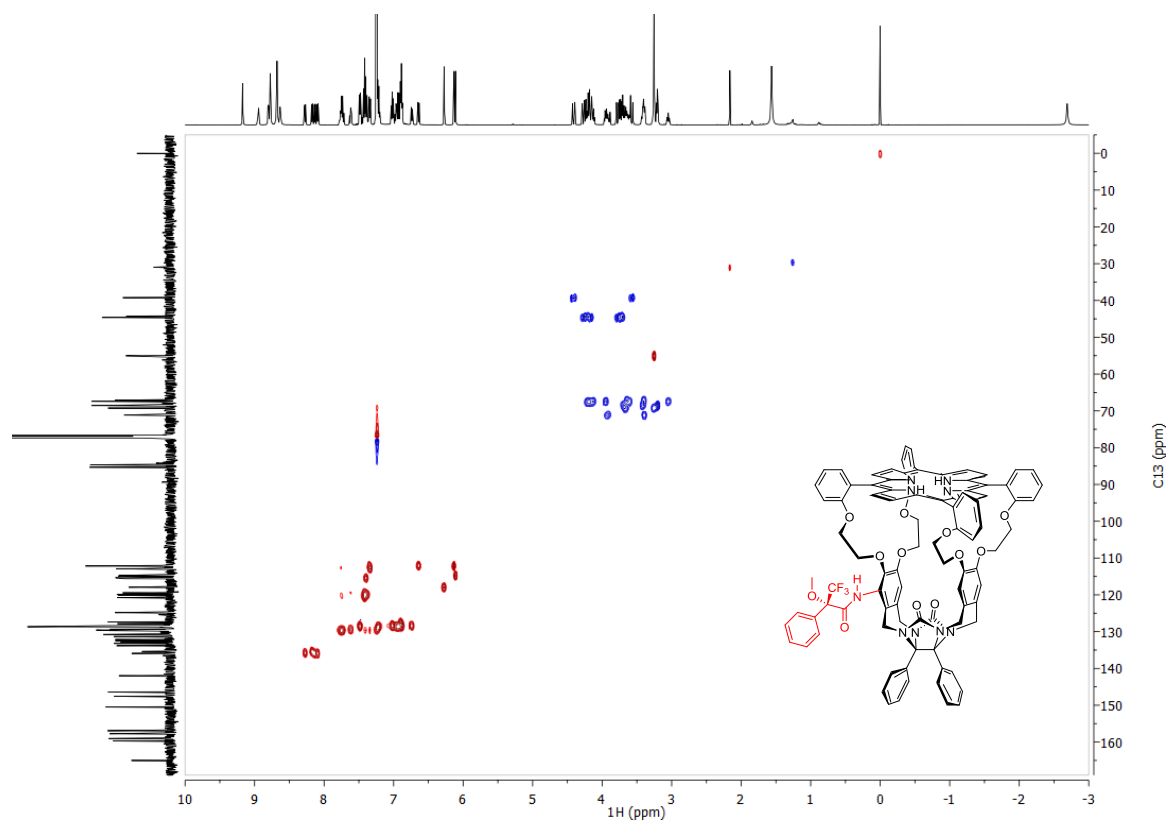

Figure S4.  $^1\text{H}$ - $^{13}\text{C}$  edited HSQC NMR spectrum (500 MHz, 298 K) of  $(R,S_\rho^*)\text{-H}_2\mathbf{4}$  in  $\text{CDCl}_3$ .  $\text{CH}_2$  groups are indicated in blue and  $\text{CH}/\text{CH}_3$  groups in red.



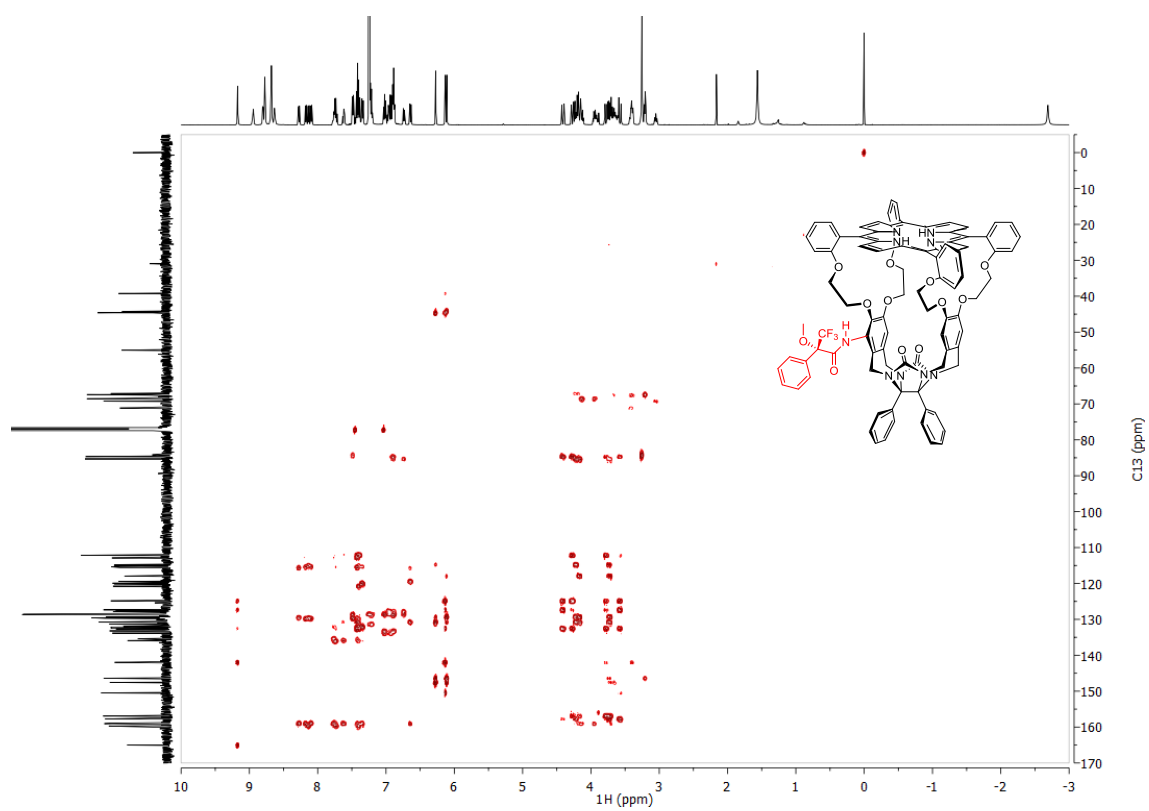

Figure S5.  $^1\text{H}$ - $^{13}\text{C}$  HMBC NMR spectrum (500 MHz, 298 K) of  $(R,S_p^*)\text{-H}_2\mathbf{4}$  in  $\text{CDCl}_3$ .

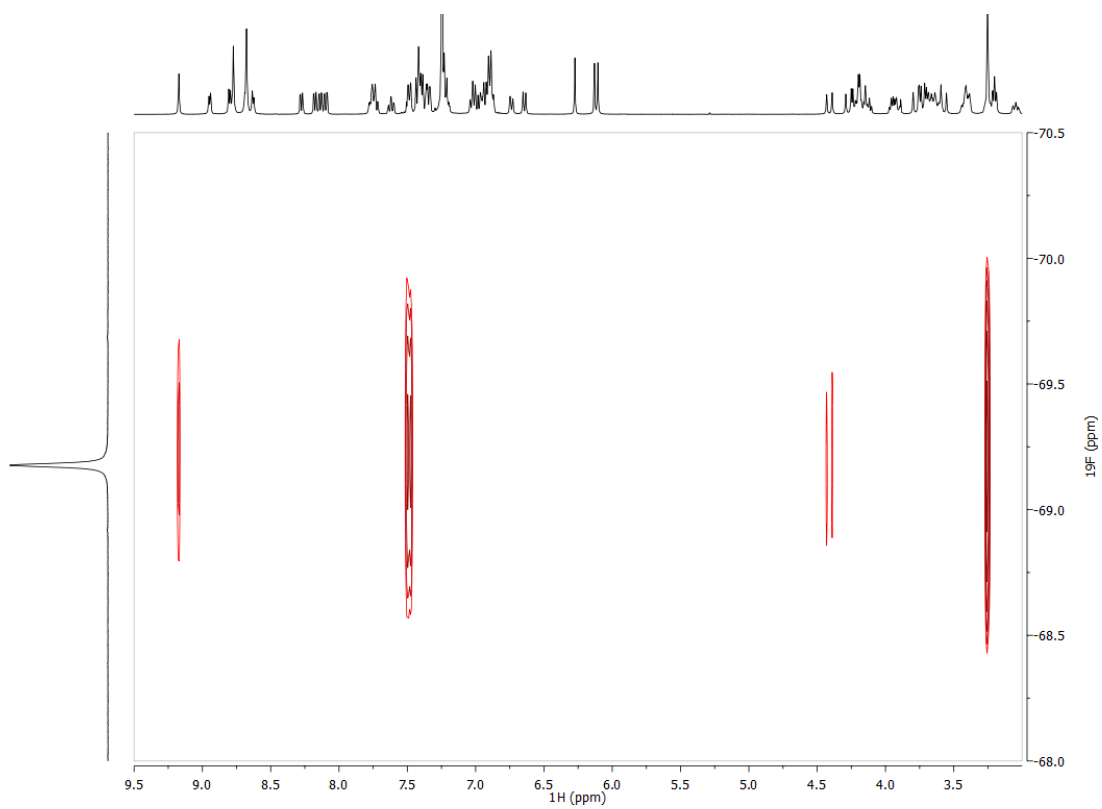

Figure S6.  $^1\text{H}$ - $^{19}\text{F}$  HOESY NMR spectrum (500 MHz, 298 K) of  $(R,S_\rho^*)\text{-H}_2\mathbf{4}$  in  $\text{CDCl}_3$ .

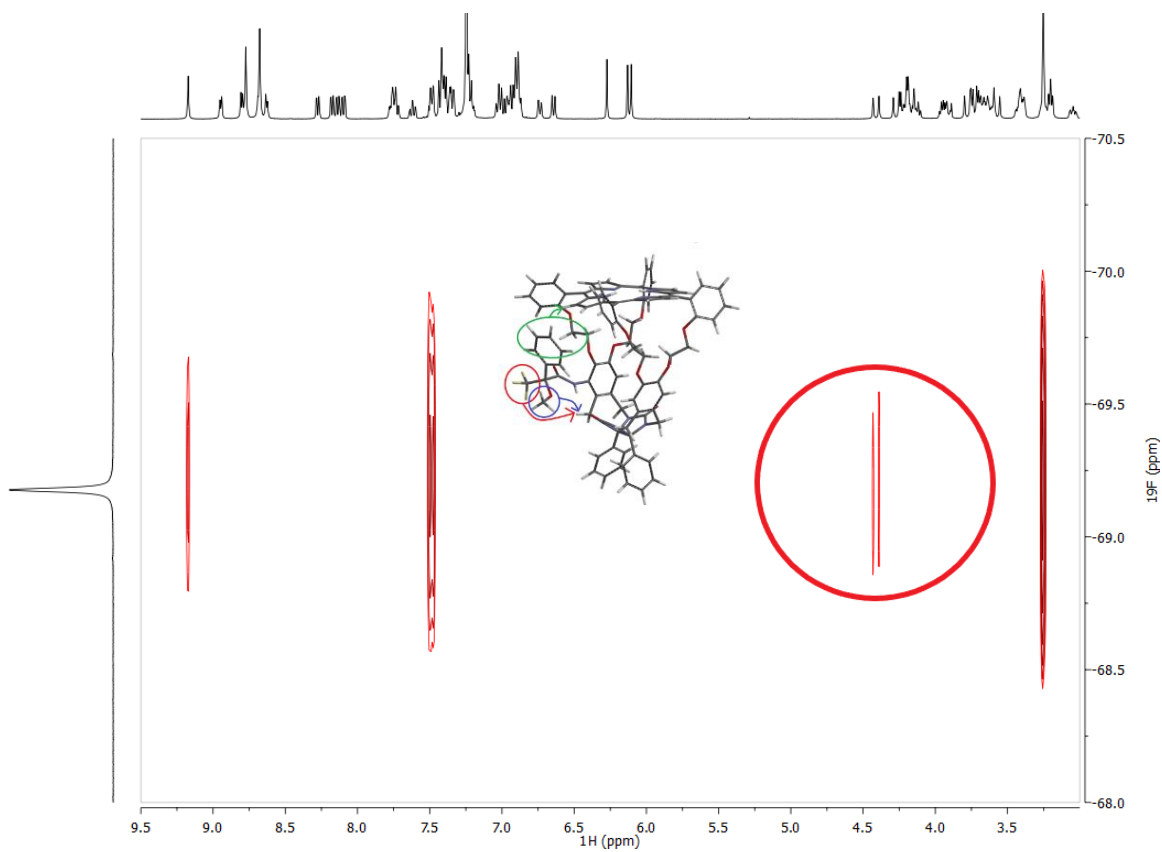

Figure S7.  $^1\text{H}$ - $^{19}\text{F}$  HOESY NMR spectrum (500 MHz, 298 K) of  $(R,S_p^*)\text{-H}_2\mathbf{4}$  in  $\text{CDCl}_3$ . (Key nOe contacts are encircled).

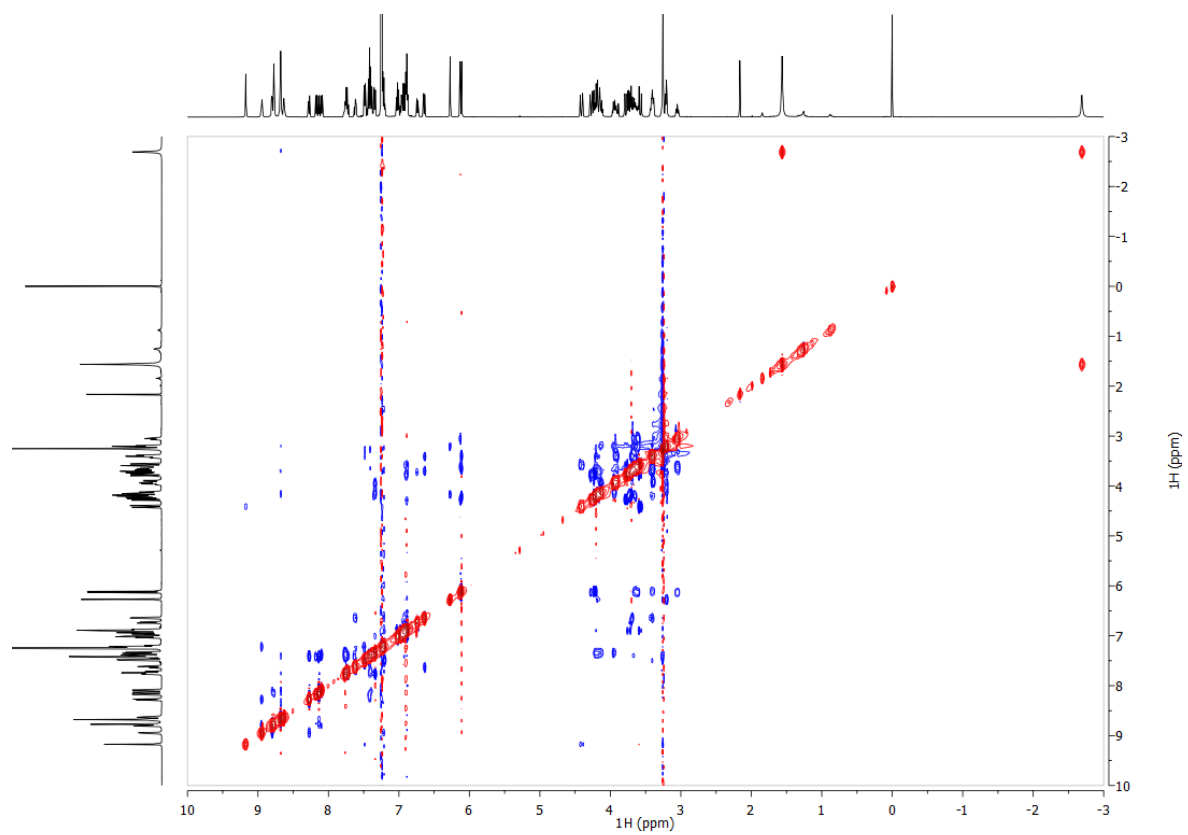

Figure S8.  $^1\text{H}$ - $^1\text{H}$  ROESY NMR spectrum (500 MHz, 298 K) of  $(R,S_p^*)\text{-H}_2\mathbf{4}$  in  $\text{CDCl}_3$ .

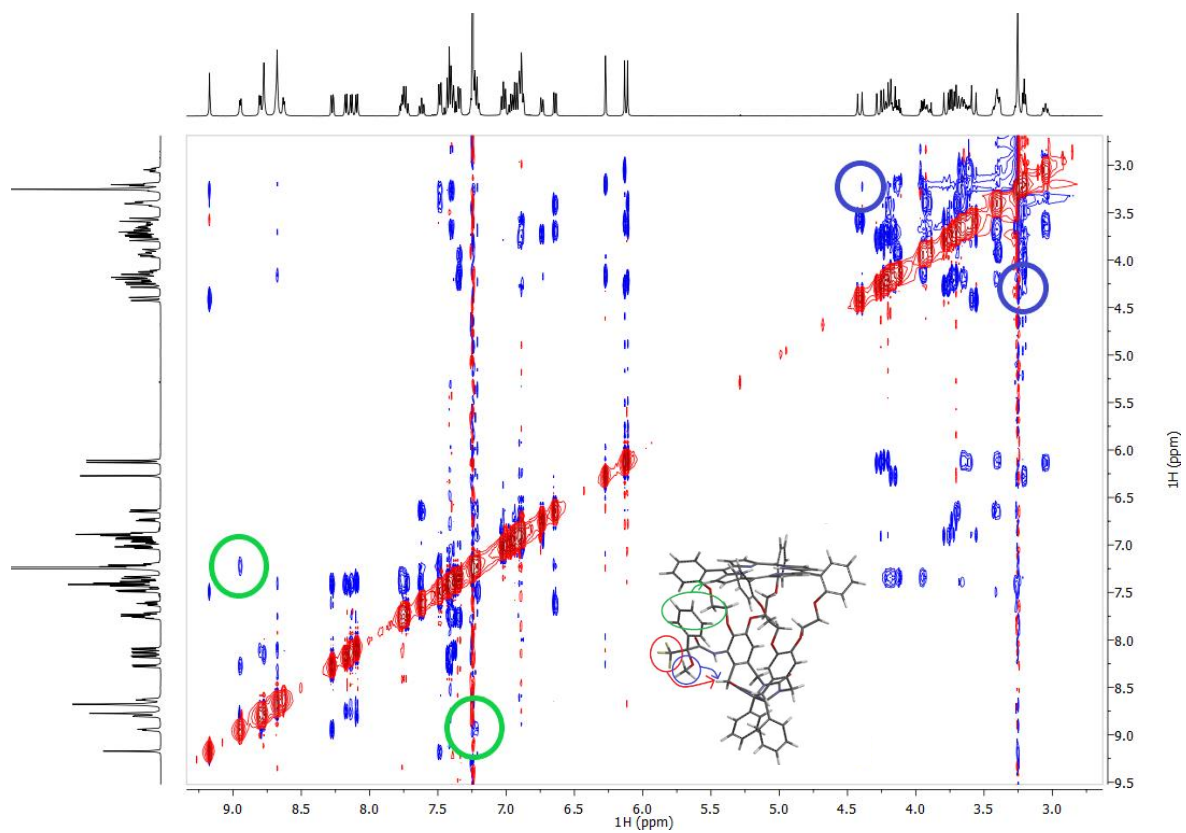

Figure S9.  $^1\text{H}$ - $^1\text{H}$  ROESY NMR spectrum (500 MHz, 298 K) of  $(R,S_p^*)\text{-H}_2\mathbf{4}$  in  $\text{CDCl}_3$ . (Key nOe contacts encircled).

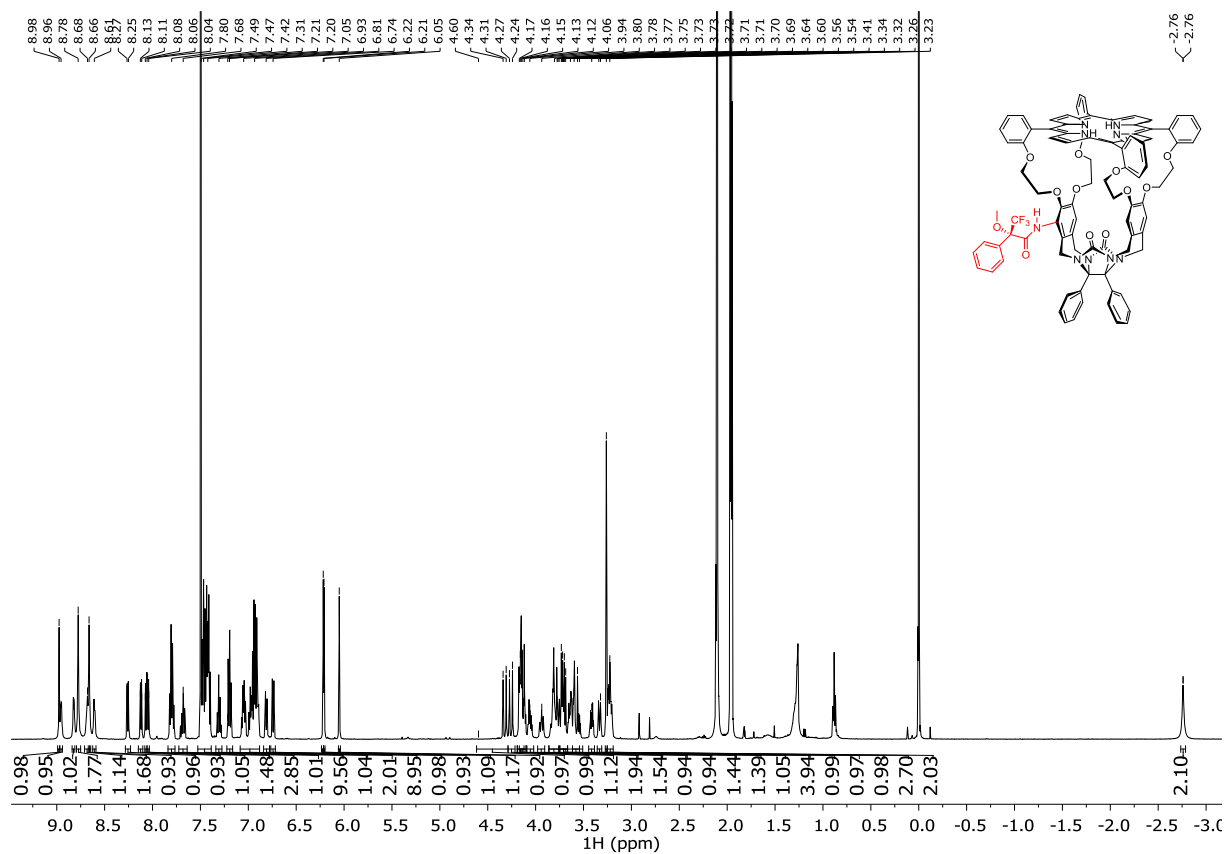

Figure S10.  $^1\text{H}$  NMR spectrum (500 MHz, 298 K) of the  $(R,S^*)\text{-H}_2\text{4}$  in  $\text{CDCl}_3:\text{D}_3\text{CCN}$ , (1:1 v/v).

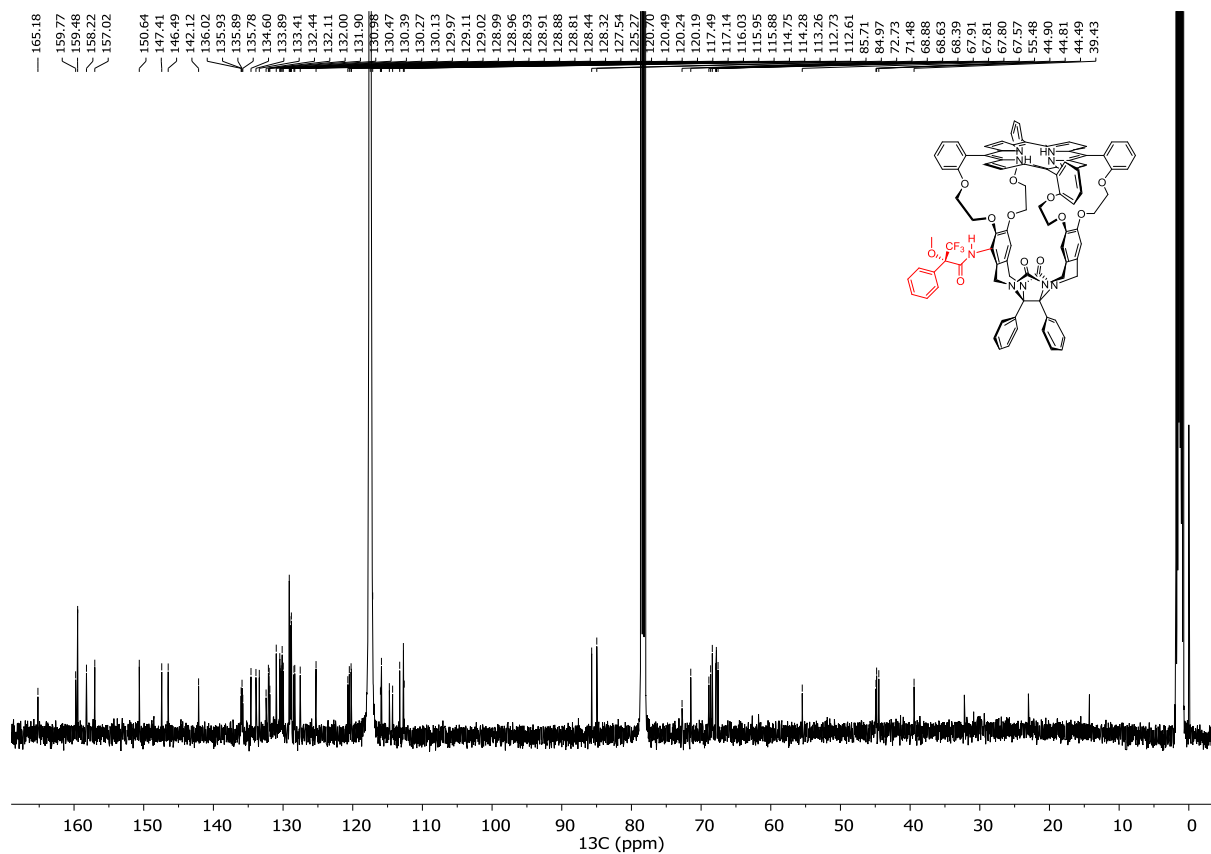

Figure S11.  $^{13}\text{C}\{^1\text{H}\}$  NMR spectrum (126 MHz, 298 K) of  $(R,S^*)\text{-H}_2\mathbf{4}$  in  $\text{CDCl}_3:\text{D}_3\text{CCN}$ , (1:1 v/v).

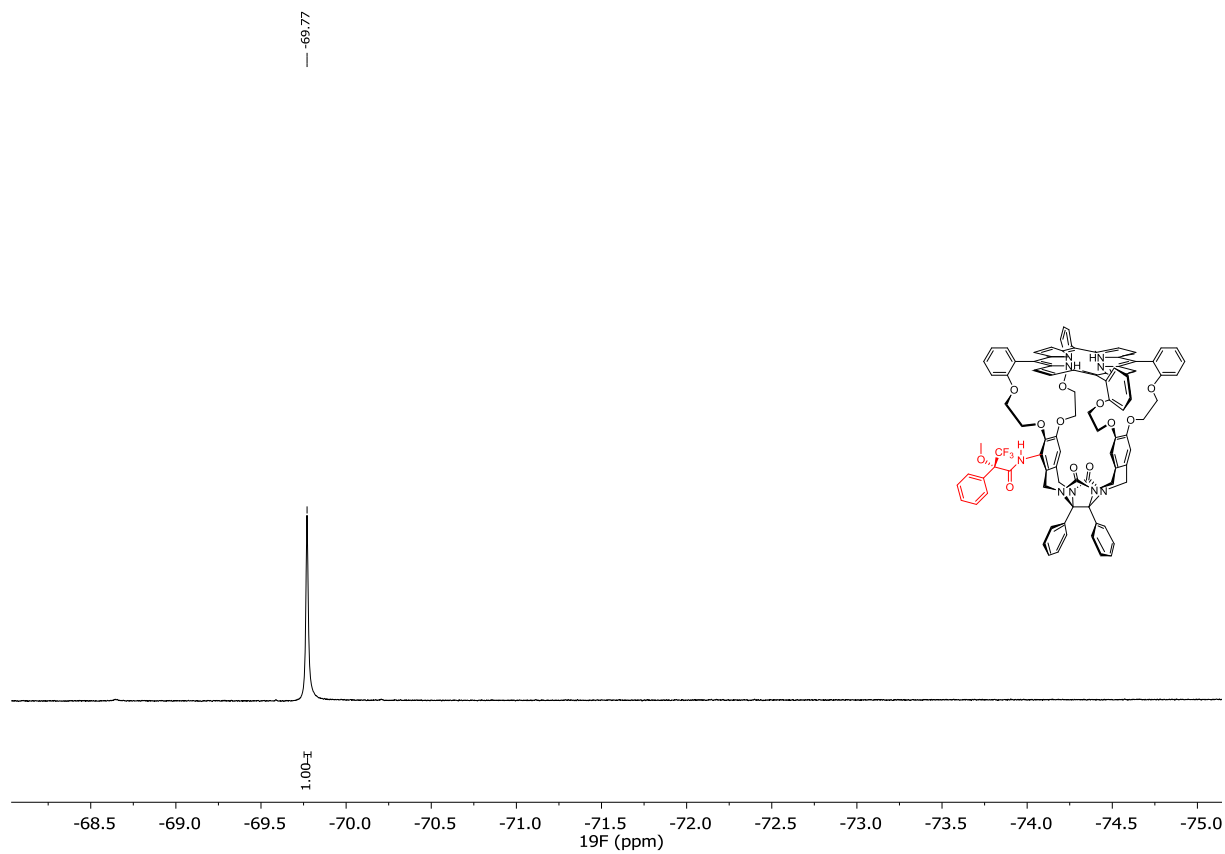

Figure S12.  $^{19}\text{F}$  NMR spectrum (471 MHz, 298 K) of  $(R,S^*)\text{-H}_2\mathbf{4}$  in  $\text{CDCl}_3$ :  $\text{D}_3\text{CCN}$ , (1:1 v/v).



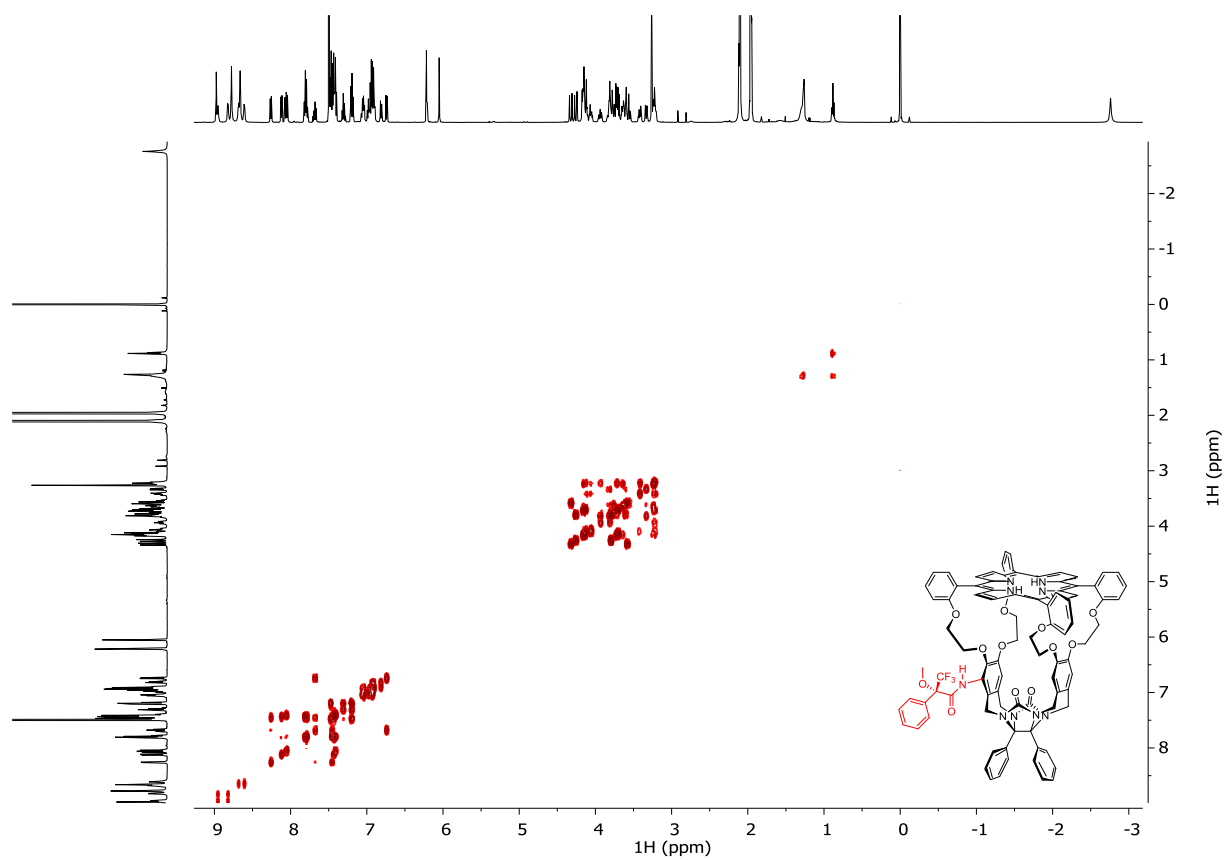

Figure S13.  $^1\text{H}$ - $^1\text{H}$  DQF-COSY NMR spectrum (500 MHz, 298 K) of (*R,S*\*)-**H<sub>2</sub>4** in  $\text{CDCl}_3$ :  
 $\text{D}_3\text{CCN}$ , (1:1 v/v).

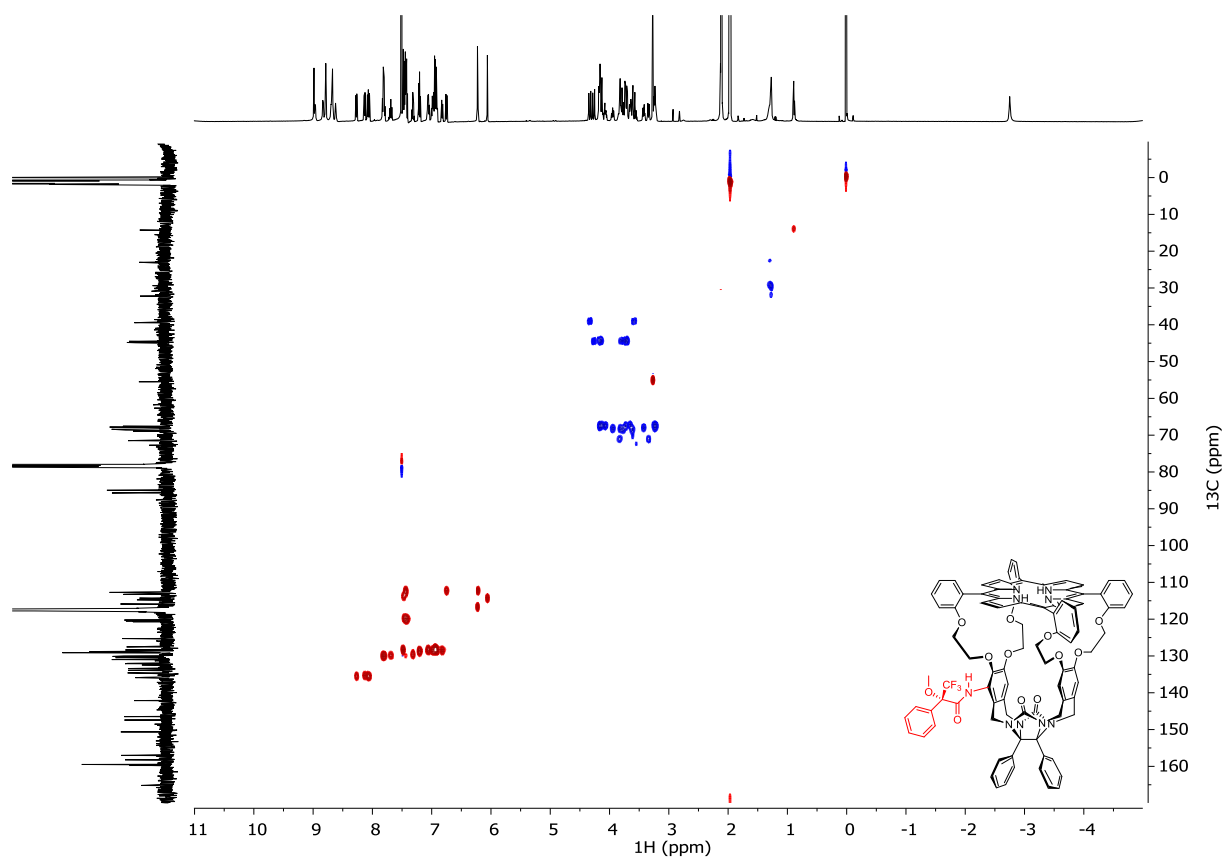

Figure S14.  $^1\text{H}$ - $^{13}\text{C}$  edited HSQC NMR spectrum (500 MHz, 298 K) of  $(R,S^*)\text{-H}_2\mathbf{4}$  in  $\text{CDCl}_3$ :  $\text{D}_3\text{CCN}$ , (1:1 v/v).  $\text{CH}_2$  groups are indicated in blue and  $\text{CH}/\text{CH}_3$  groups in red.

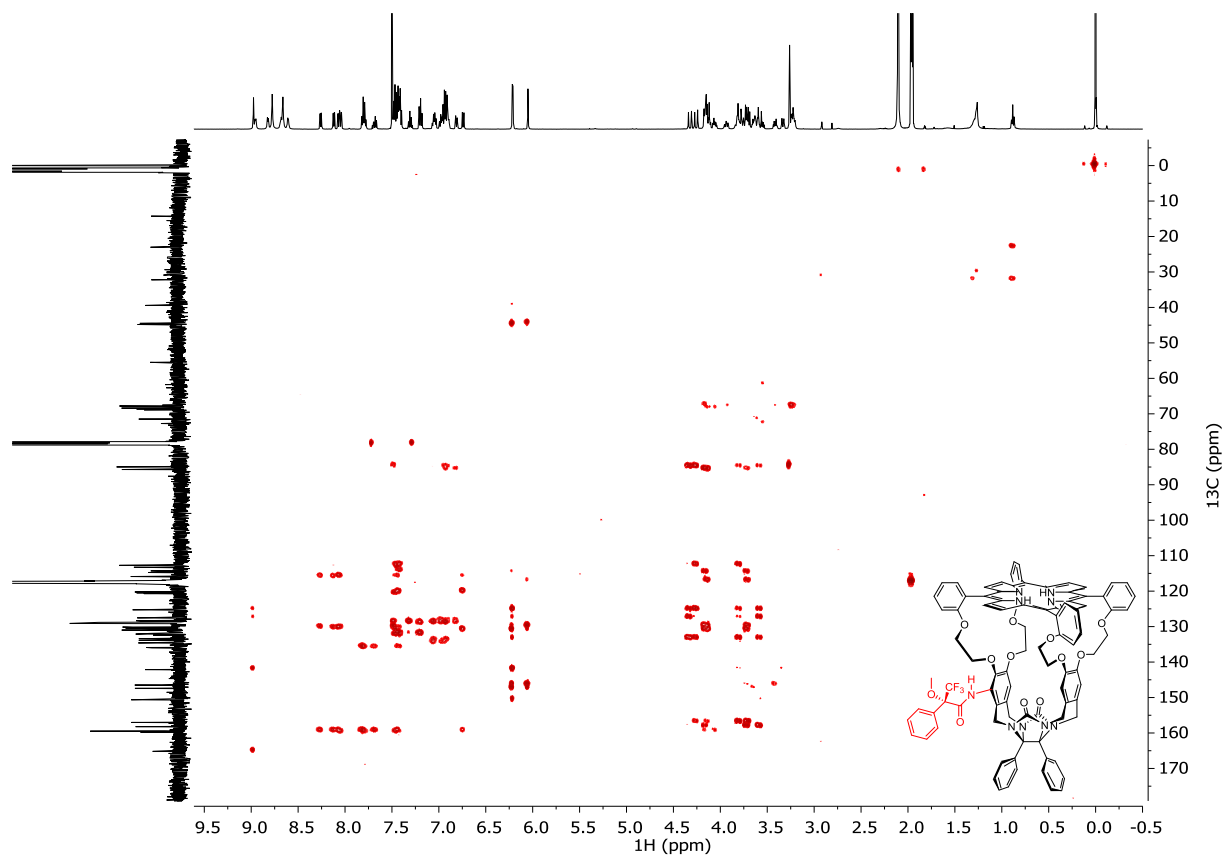

Figure S15.  $^1\text{H}$ - $^{13}\text{C}$  HMBC NMR spectrum (500 MHz, 298 K) of (*R,S*\*)-**H<sub>24</sub>** in  $\text{CDCl}_3$ : $\text{D}_3\text{CCN}$ , (1:1 v/v).

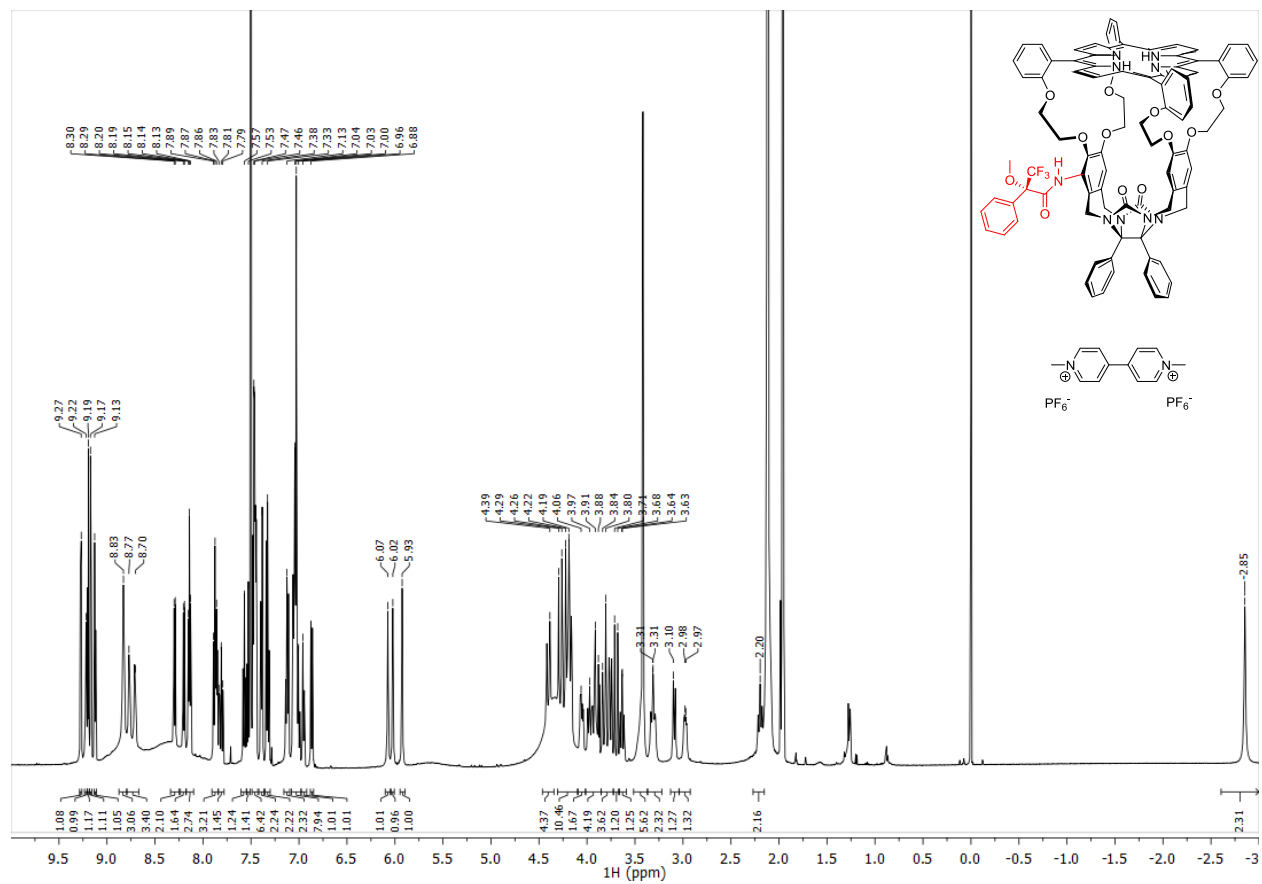

Figure S16.  $^1\text{H}$  NMR spectrum (500 MHz, 298 K) of the  $(R,S)\text{-H}_2\mathbf{4}$  complex with  $\mathbf{V1}$  in  $\text{CDCl}_3:\text{D}_3\text{CCN}$ , (1:1 v/v).

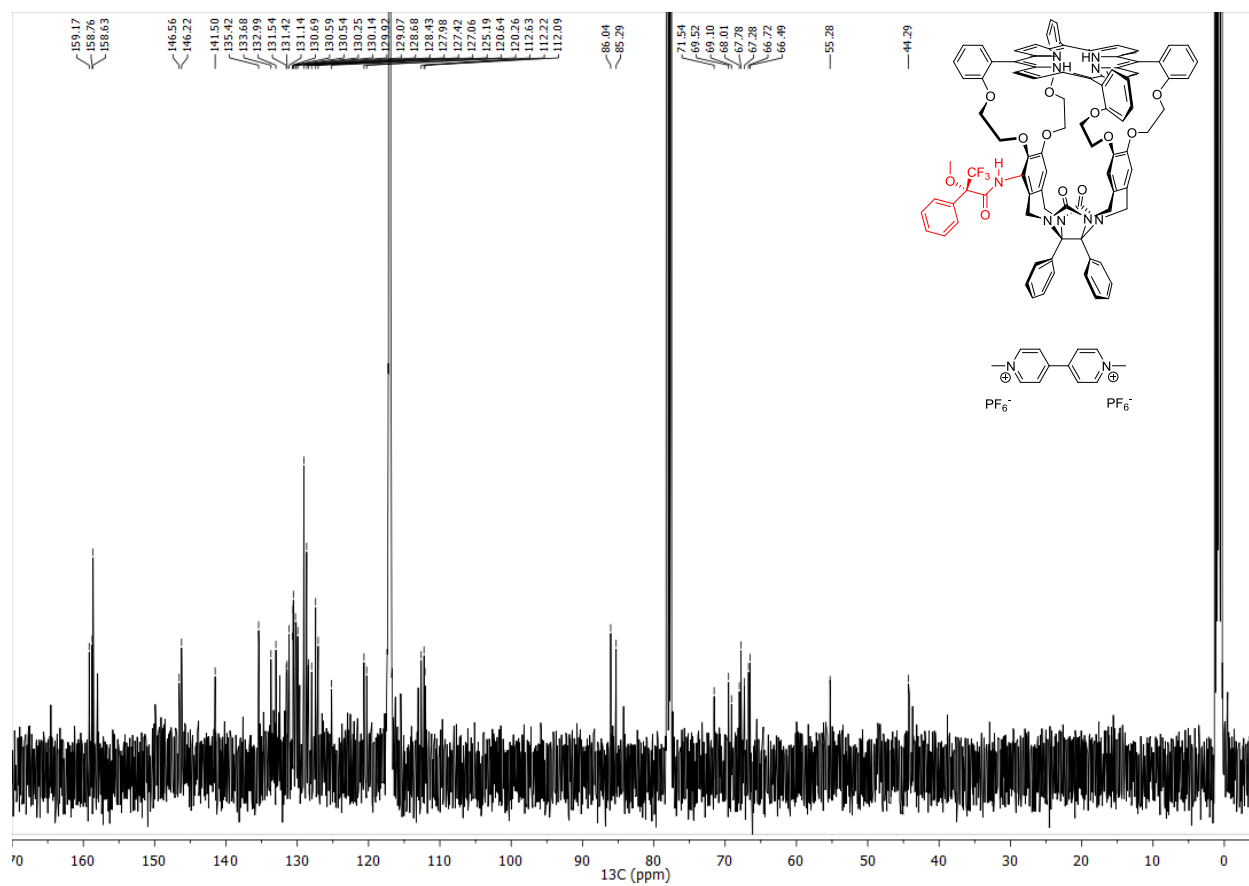

Figure S17.  $^{13}\text{C}\{^1\text{H}\}$  NMR spectrum (126 MHz, 298 K) of the  $(R,S^*)\text{-H}_2\mathbf{4}$  complex with **V1** in  $\text{CDCl}_3$ :  $\text{D}_3\text{CCN}$ , (1:1 v/v).

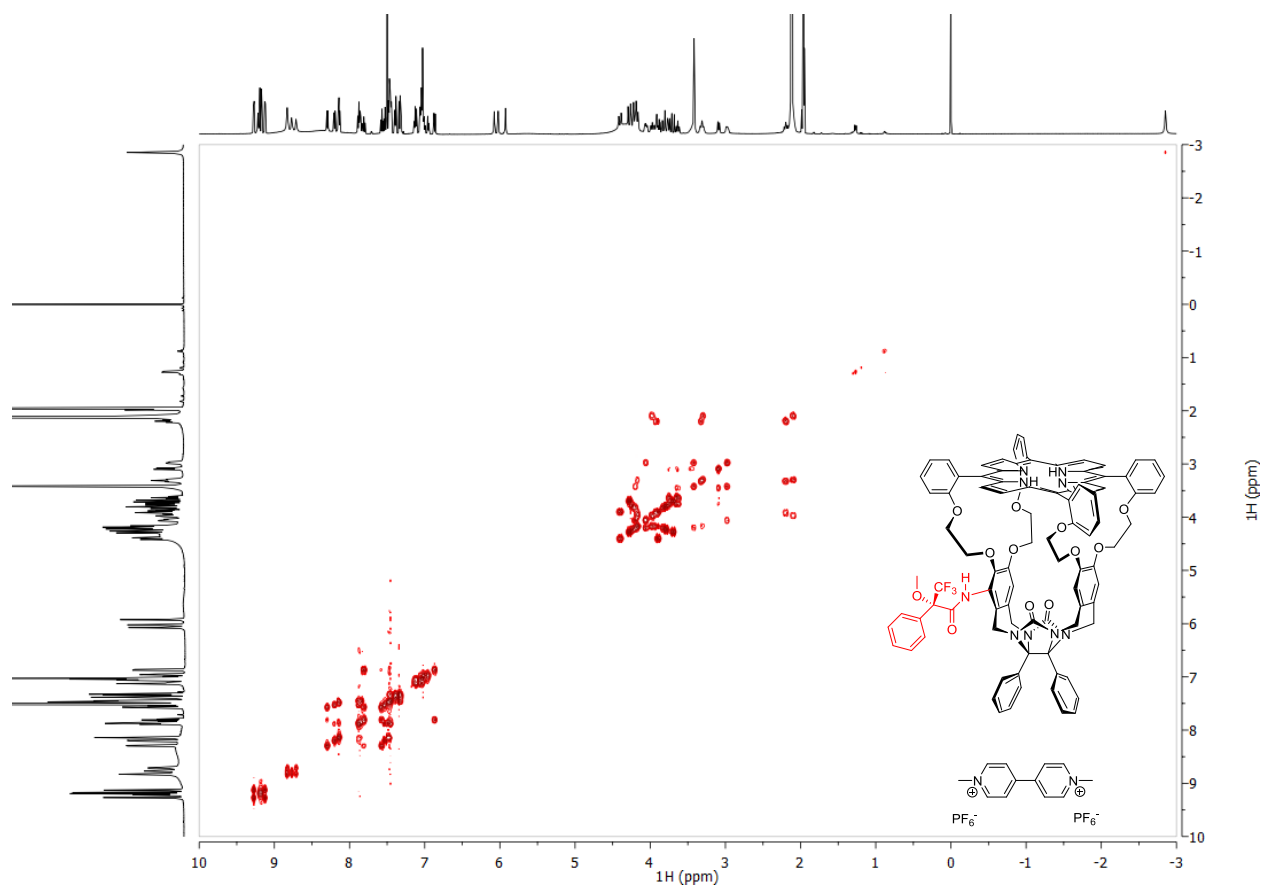

Figure S18.  $^1\text{H}$ - $^1\text{H}$  DQF-COSY NMR spectrum (500 MHz, 298 K) of the  $(R,S^*)\text{-H}_24$  complex with **V1** in  $\text{CDCl}_3$ :  $\text{D}_3\text{CCN}$ , (1:1 v/v).

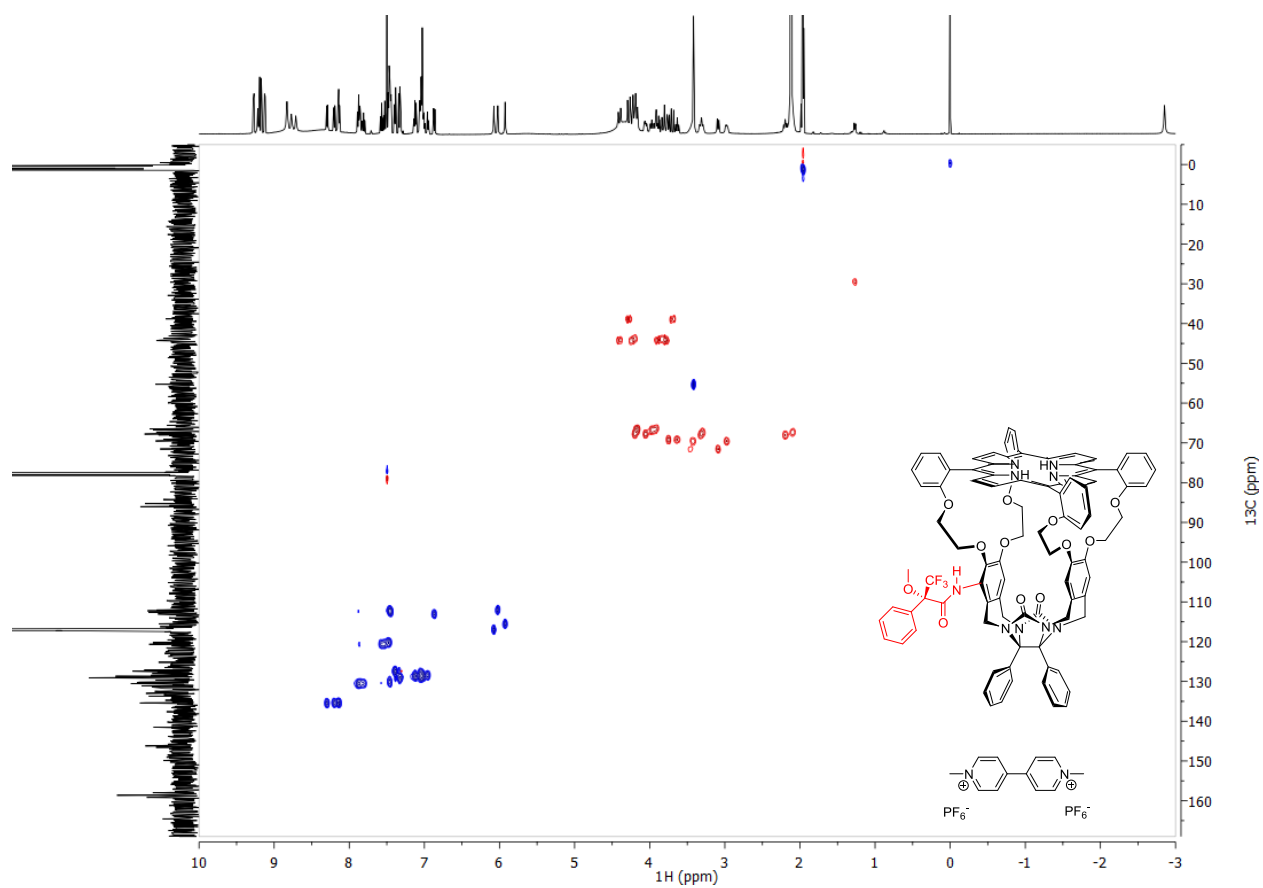

Figure S19.  $^1\text{H}$ - $^{13}\text{C}$  HSQC edited NMR spectrum (500 MHz, 298 K) of the  $(R,S^*)\text{-H}_2\text{4}$  complex with **V1** in  $\text{CDCl}_3$ :  $\text{D}_3\text{CCN}$ , (1:1 v/v).  $\text{CH}_2$  groups are indicated in blue and  $\text{CH}/\text{CH}_3$  groups in red.

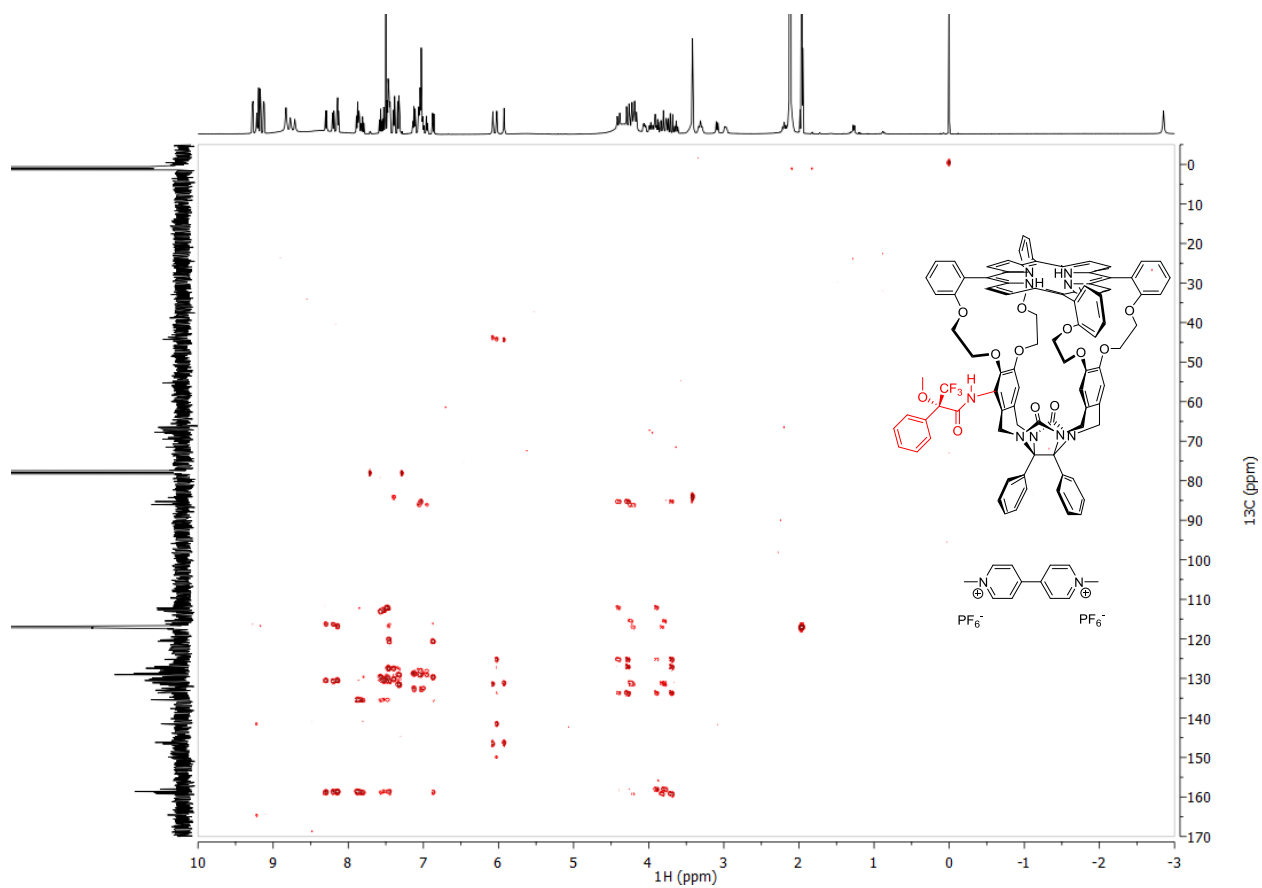

Figure S20.  $^1\text{H}$ - $^{13}\text{C}$  HMBC NMR spectrum (500 MHz, 298 K) of the  $(R,S)$ - $\text{H}_24$  complex with **V1** in  $\text{CDCl}_3$ :  $\text{D}_3\text{CCN}$ , (1:1 v/v).



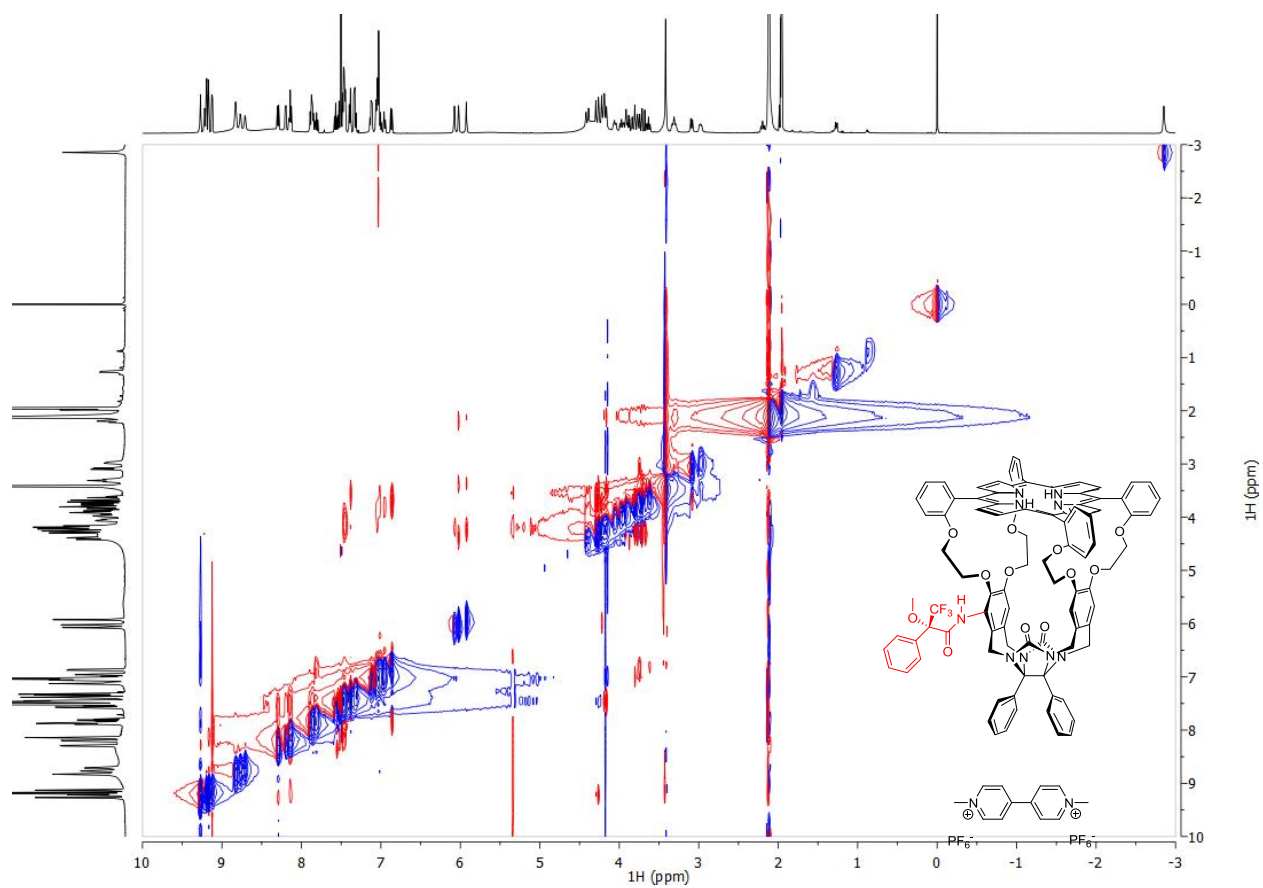

Figure S21.  $^1\text{H}$ - $^1\text{H}$  ROESY NMR spectrum (500 MHz, 298 K) of the  $(R,S^*)$ - $\text{H}_2\mathbf{4}$  complex with  $\mathbf{V1}$  in  $\text{CDCl}_3$ :  $\text{D}_3\text{CCN}$ , (1:1 v/v).

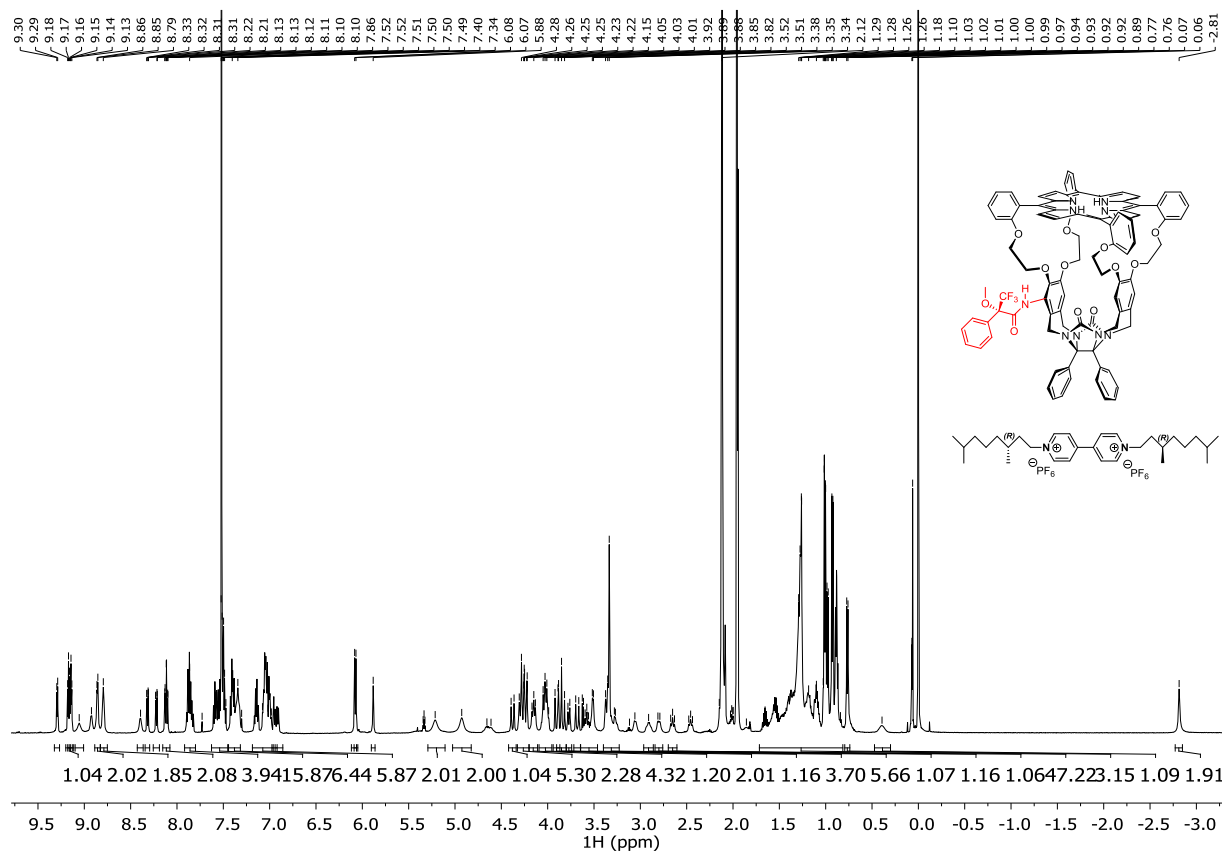

Figure S22.  $^1\text{H}$  NMR spectrum (500 MHz, 298 K) of the  $(R,S^*)$ - $\text{H}_24$  complex with  $(R,R)$ - $\text{V}2$  in  $\text{CDCl}_3$ :  $\text{D}_3\text{CCN}$ , (1:1 v/v).

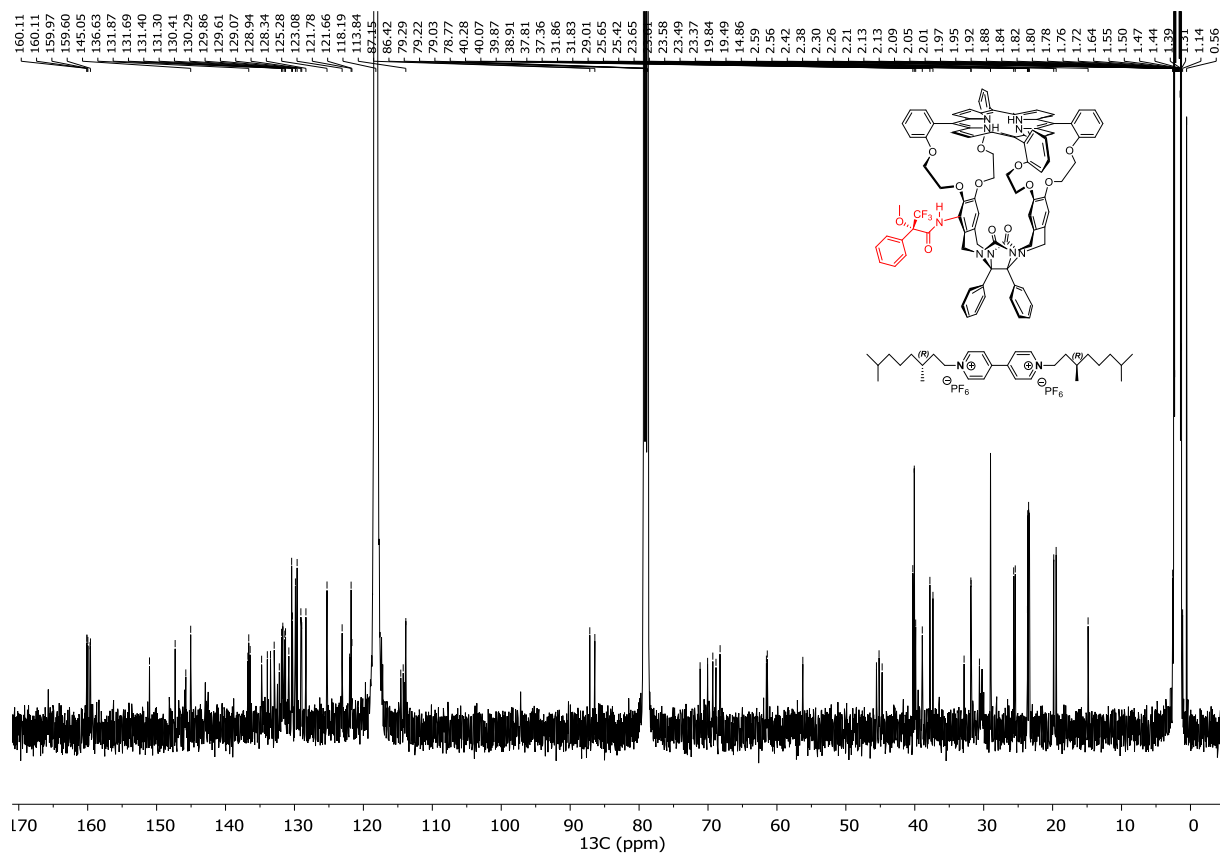

Figure S23.  $^{13}\text{C}\{^1\text{H}\}$  NMR spectrum (126 MHz, 298 K) of  $(R,S^*)$ -H<sub>2</sub>4 complex with  $(R,R)$ -V2 in  $\text{CDCl}_3$ :  $\text{D}_3\text{CCN}$ , (1:1 v/v).

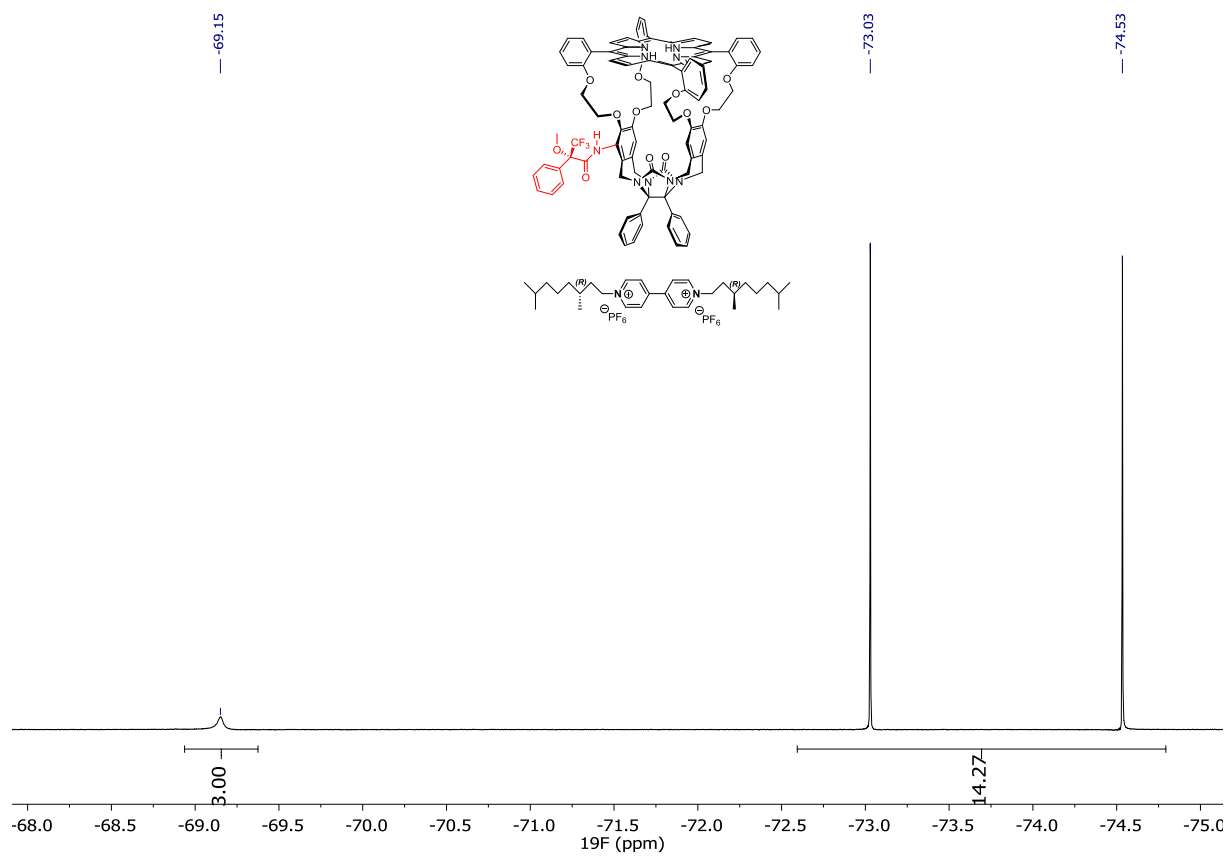

Figure S24.  $^{19}\text{F}$  NMR spectrum (471 MHz, 298 K) of  $(R,S^*)\text{-H}_2\mathbf{4}$  complex with  $(R,R)\text{-V2}$  in  $\text{CDCl}_3: \text{D}_3\text{CCN}$ , (1:1 v/v).

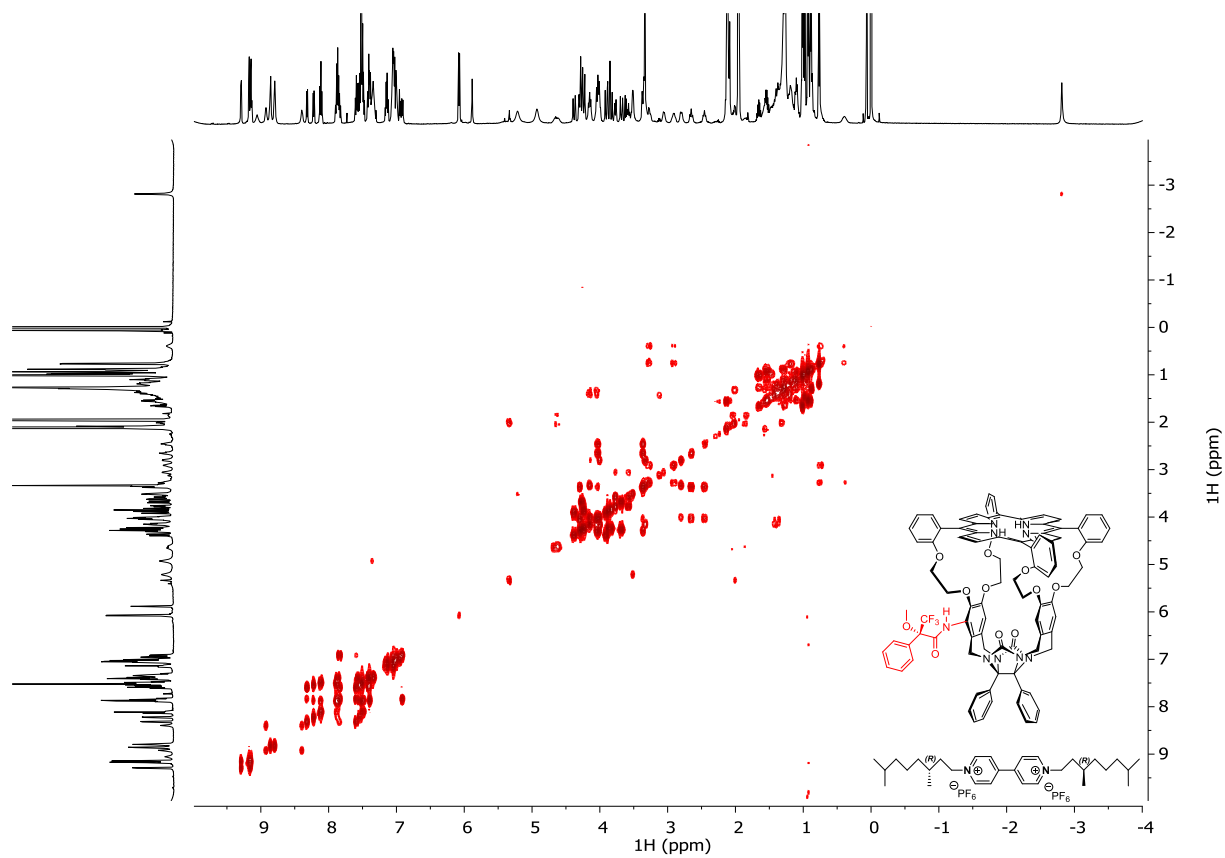

Figure S25.  $^1\text{H}$ - $^1\text{H}$  DQF-COSY NMR spectrum (500 MHz, 298 K) of  $(R,S^*)$ -**H<sub>24</sub>** complex with  $(R,R)$ -**V<sub>2</sub>** in  $\text{CDCl}_3$ :  $\text{D}_3\text{CCN}$ , (1:1 v/v).

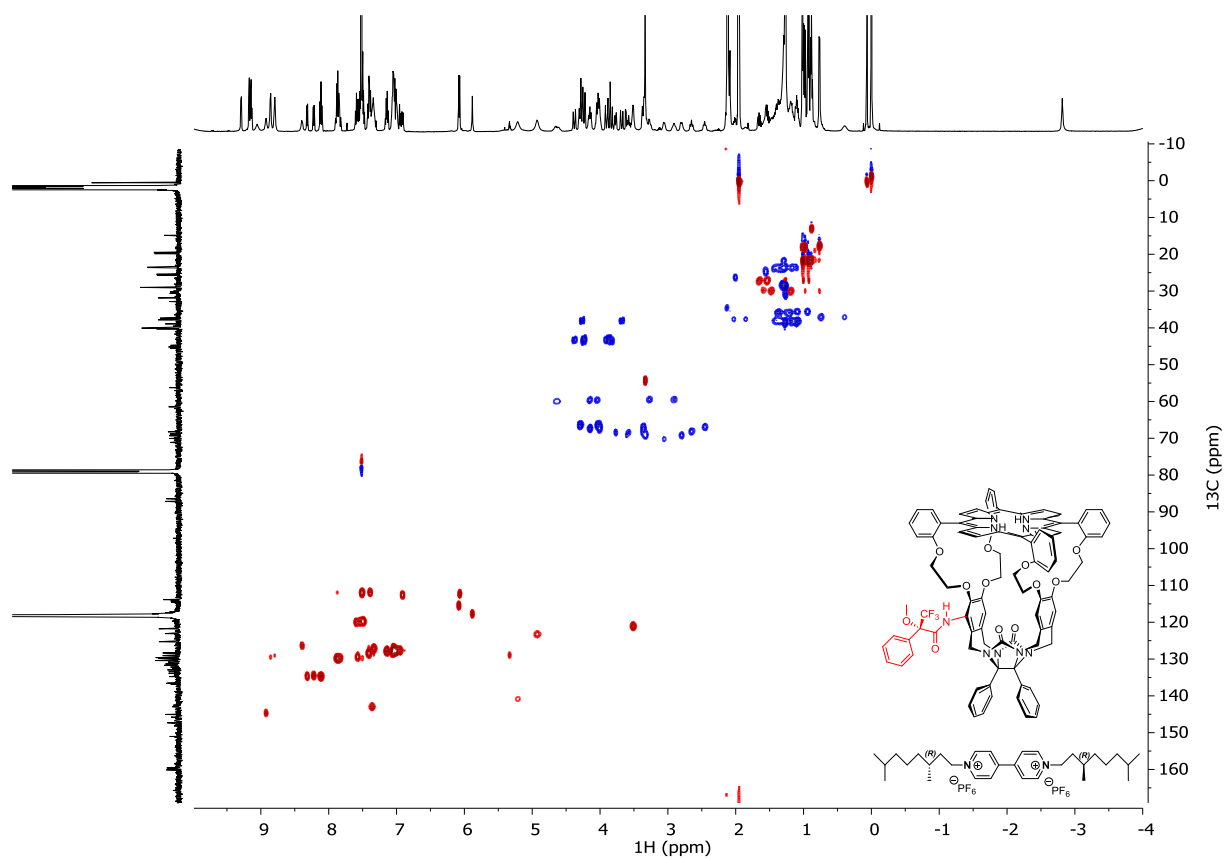

Figure S26.  $^1\text{H}$ - $^{13}\text{C}$  edited HSQC NMR spectrum (500 MHz, 298 K) of  $(R,S^*)$ -H<sub>2</sub>4 complex with  $(R,R)$ -V2 in  $\text{CDCl}_3$ :  $\text{D}_3\text{CCN}$ , (1:1 v/v).  $\text{CH}_2$  groups are indicated in blue and  $\text{CH}/\text{CH}_3$  groups in red.

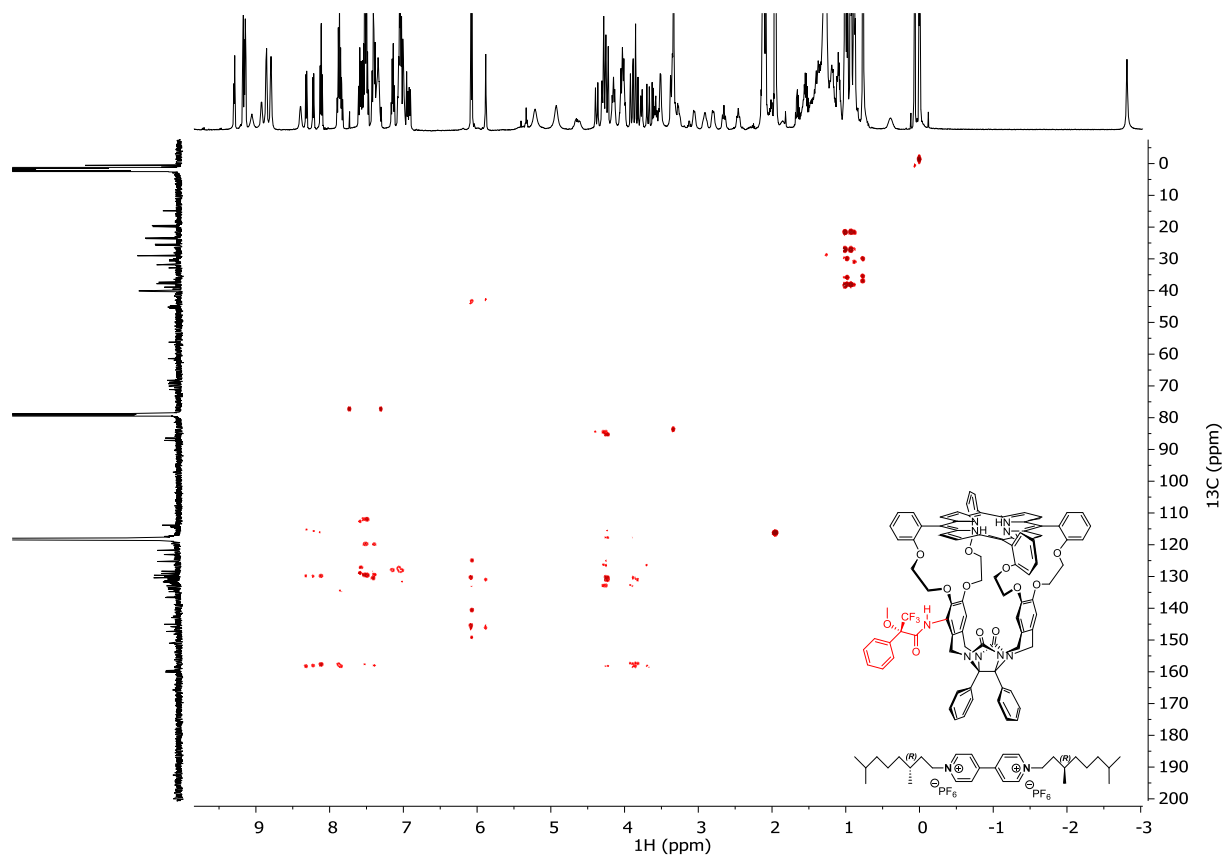

Figure S27.  $^1\text{H}$ - $^{13}\text{C}$  HMBC NMR spectrum (500 MHz, 298 K) of  $(R,S^*)$ - $\text{H}_24$  complex with  $(R,R)$ - $\text{V}2$  in  $\text{CDCl}_3$ :  $\text{D}_3\text{CCN}$ , (1:1 v/v).

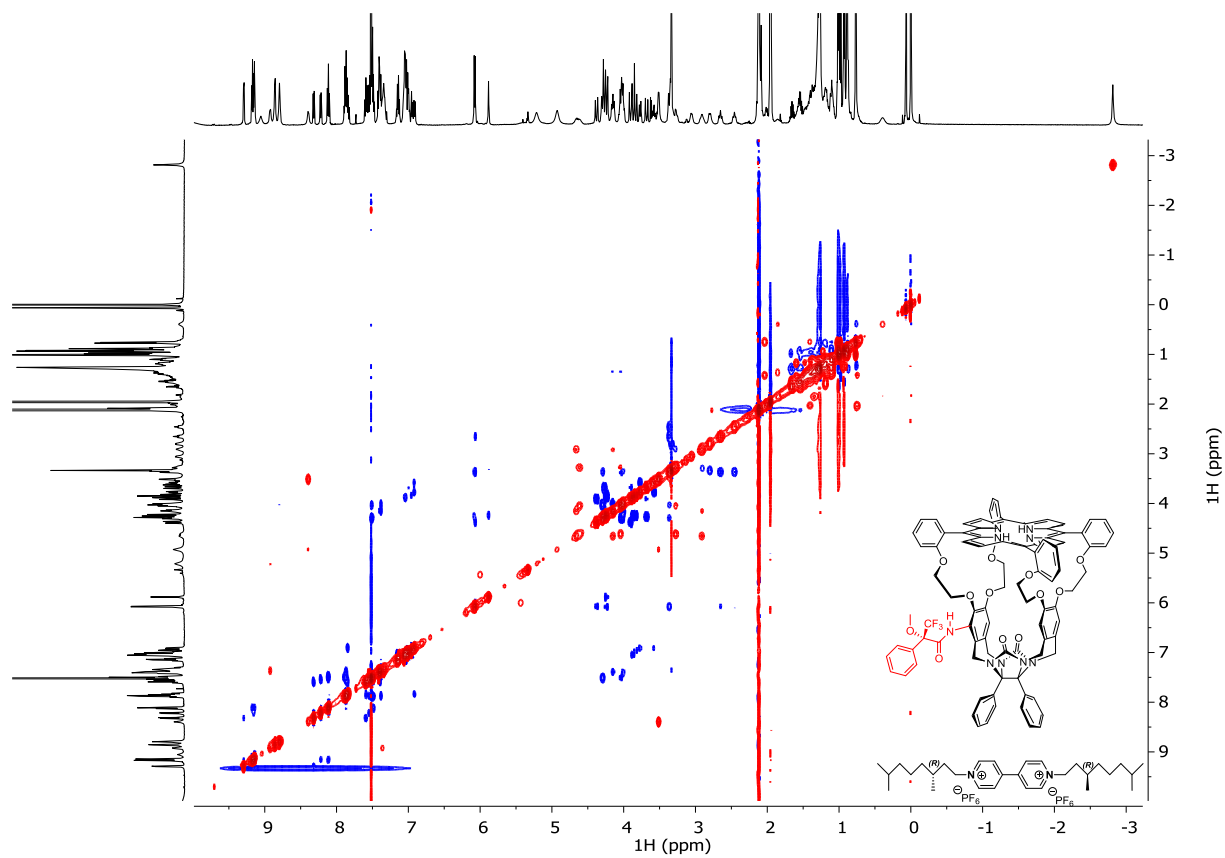

Figure S28.  $^1\text{H}$ - $^1\text{H}$  ROESY NMR spectrum (500 MHz, 298 K) of  $(R,S^*)\text{-H}_24$  complex with  $(R,R)\text{-V}2$  in  $\text{CDCl}_3$ :  $\text{D}_3\text{CCN}$ , (1:1 v/v).



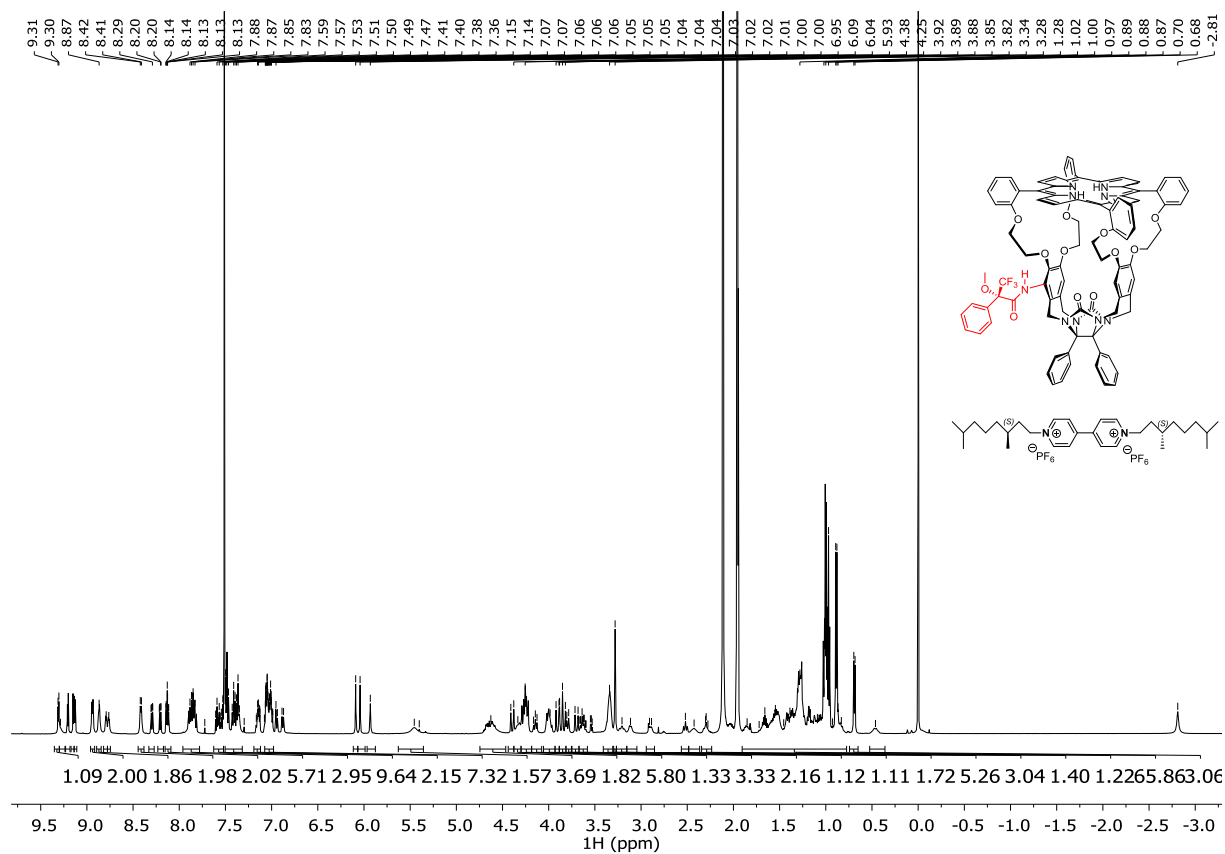

Figure S29. <sup>1</sup>H NMR spectrum (500 MHz, 298 K) of the (R,S\*)-H<sub>2</sub>4 complex with (S,S)-V<sub>2</sub> in CDCl<sub>3</sub>: D<sub>3</sub>CCN, (1:1 v/v).

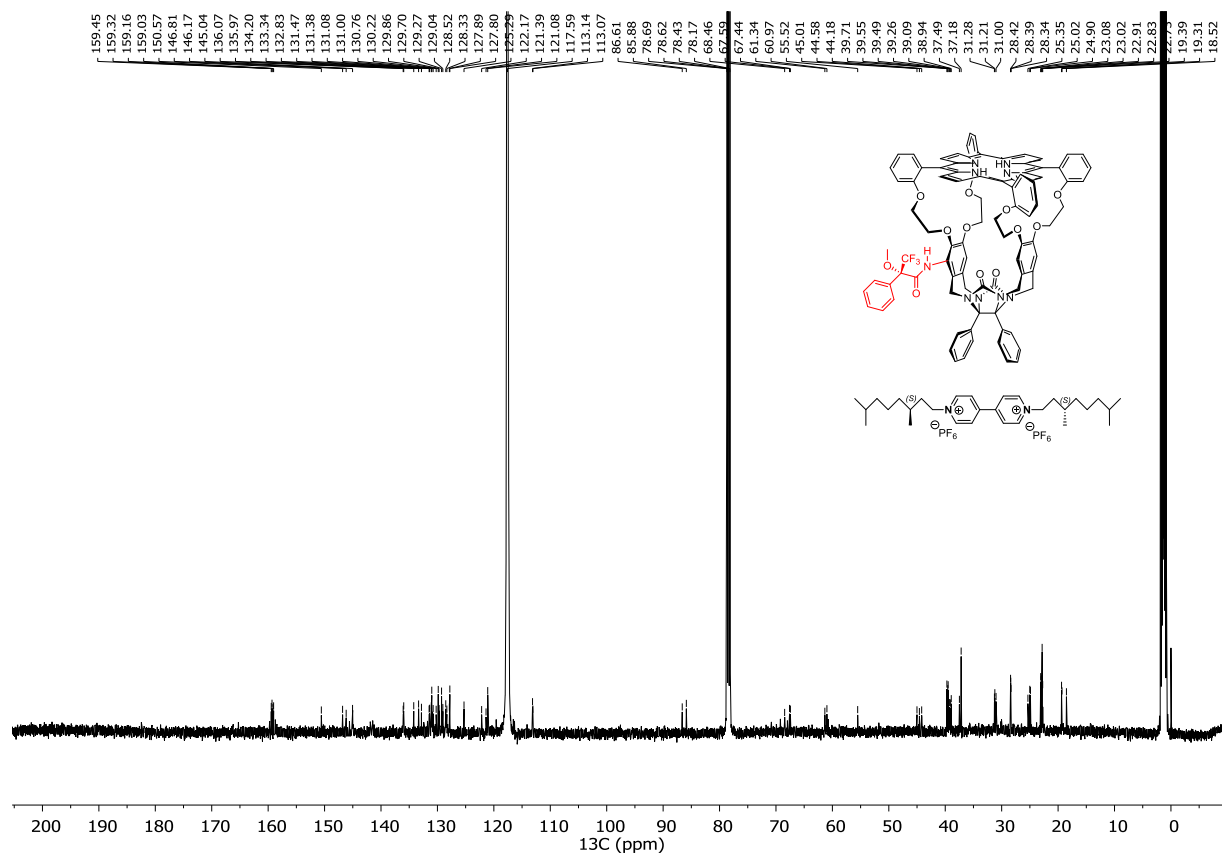

Figure S30.  $^{13}\text{C}\{^1\text{H}\}$  NMR spectrum (126 MHz, 298 K) of  $(R,S^*)\text{-H}_24$  complex with  $(S,S)\text{-V2}$  in  $\text{CDCl}_3:\text{D}_3\text{CCN}$ , (1:1 v/v).

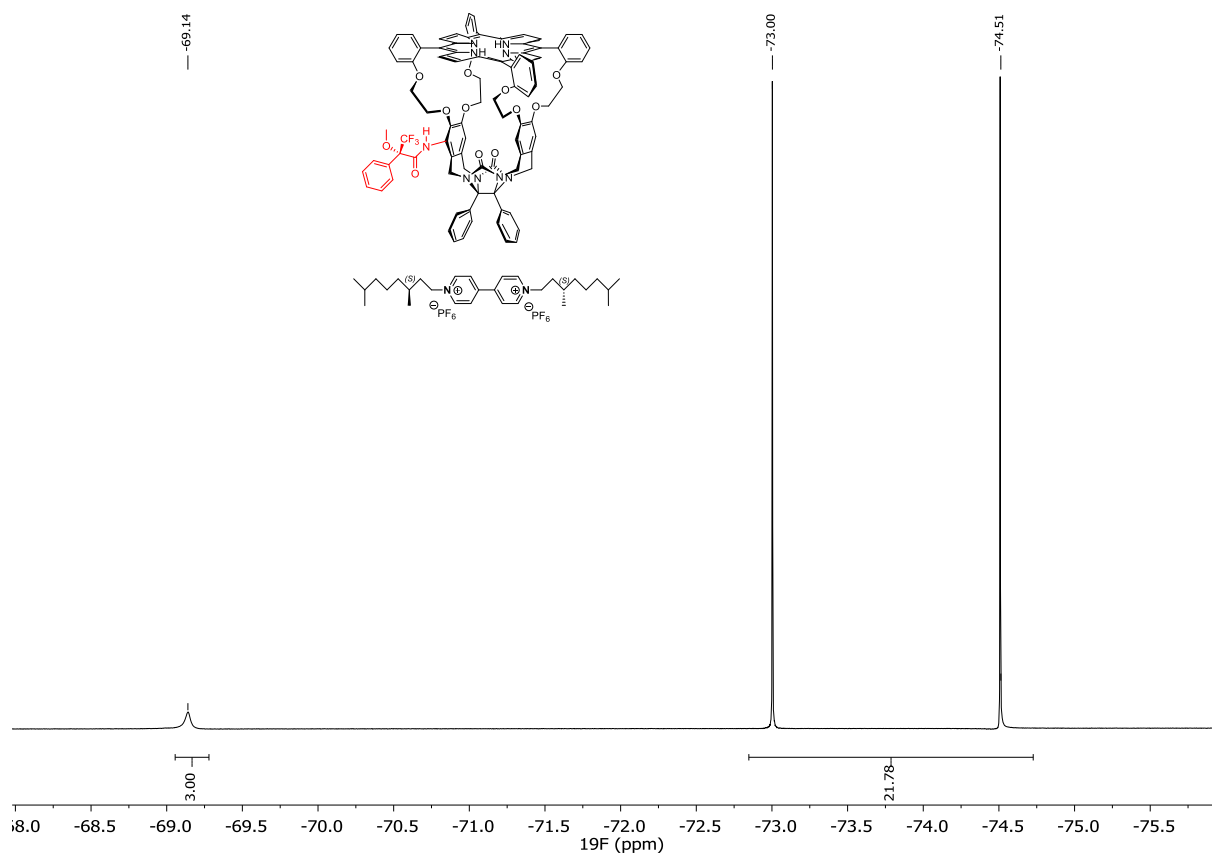

Figure S31.  $^{19}\text{F}$  NMR spectrum (471 MHz, 298 K) of  $(R,S^*)\text{-H}_2\mathbf{4}$  complex with  $(R,R)\text{-V2}$  in  $\text{CDCl}_3:\text{D}_3\text{CCN}$ , (1:1 v/v).

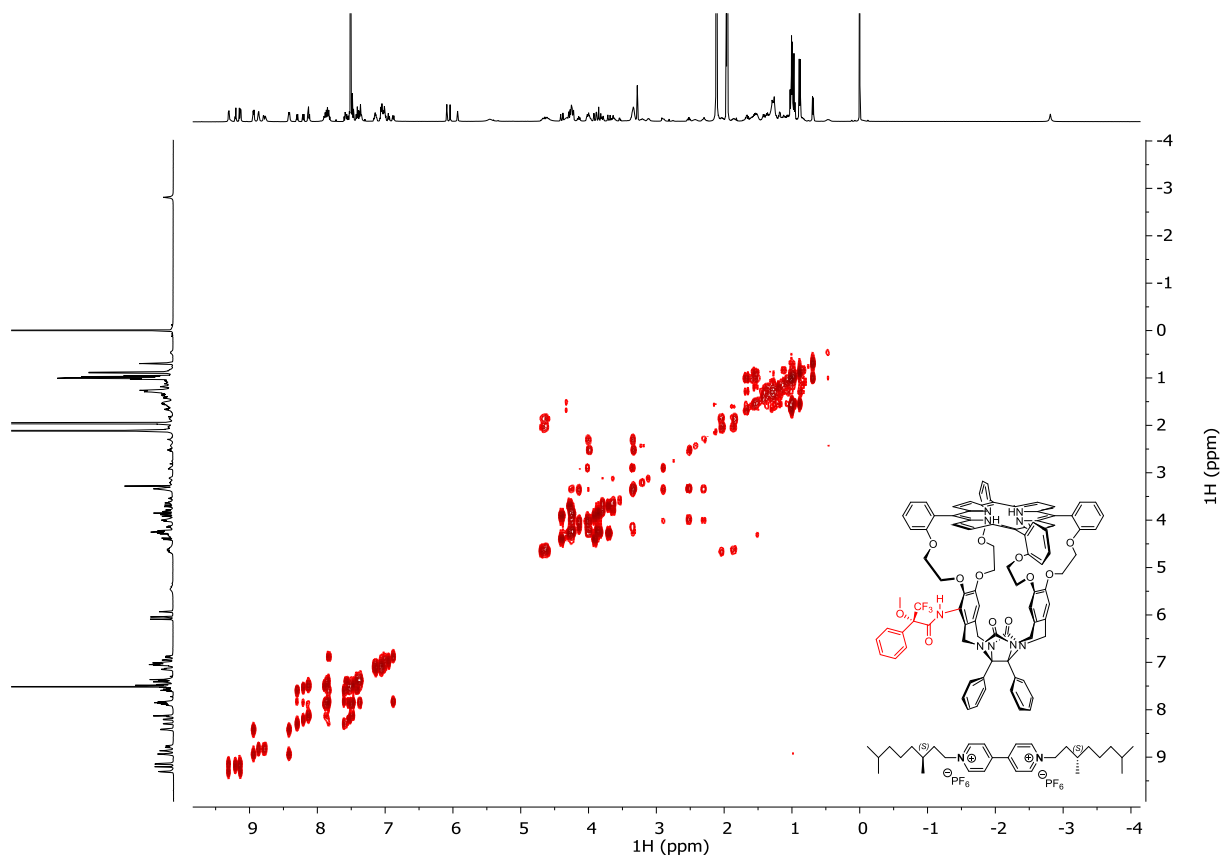

Figure S32.  $^1\text{H}$ - $^1\text{H}$  DQF-COSY NMR spectrum (500 MHz, 298 K) of  $(R,S^*)$ -**H**<sub>2</sub>**4** complex with  $(S,S)$ -**V**<sub>2</sub> in  $\text{CDCl}_3$ :  $\text{D}_3\text{CCN}$ , (1:1 v/v).

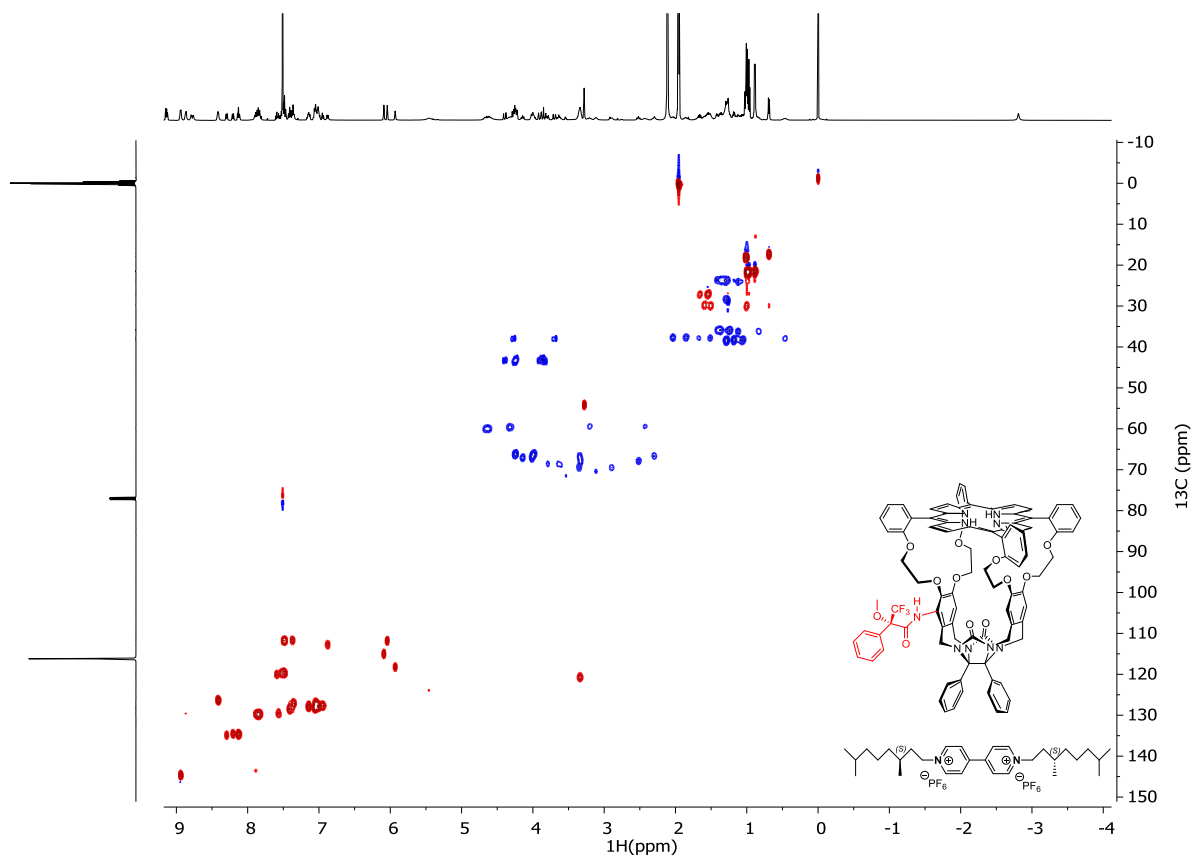

Figure S33.  $^1\text{H}$ - $^{13}\text{C}$  edited HSQC NMR spectrum (500 MHz, 298 K) of  $(R,S^*)\text{-H}_2\text{4}$  complex with  $(S,S)\text{-V2}$  in  $\text{CDCl}_3$ :  $\text{D}_3\text{CCN}$ , (1:1 v/v).  $\text{CH}_2$  groups are indicated in blue and  $\text{CH}/\text{CH}_3$  groups in red.

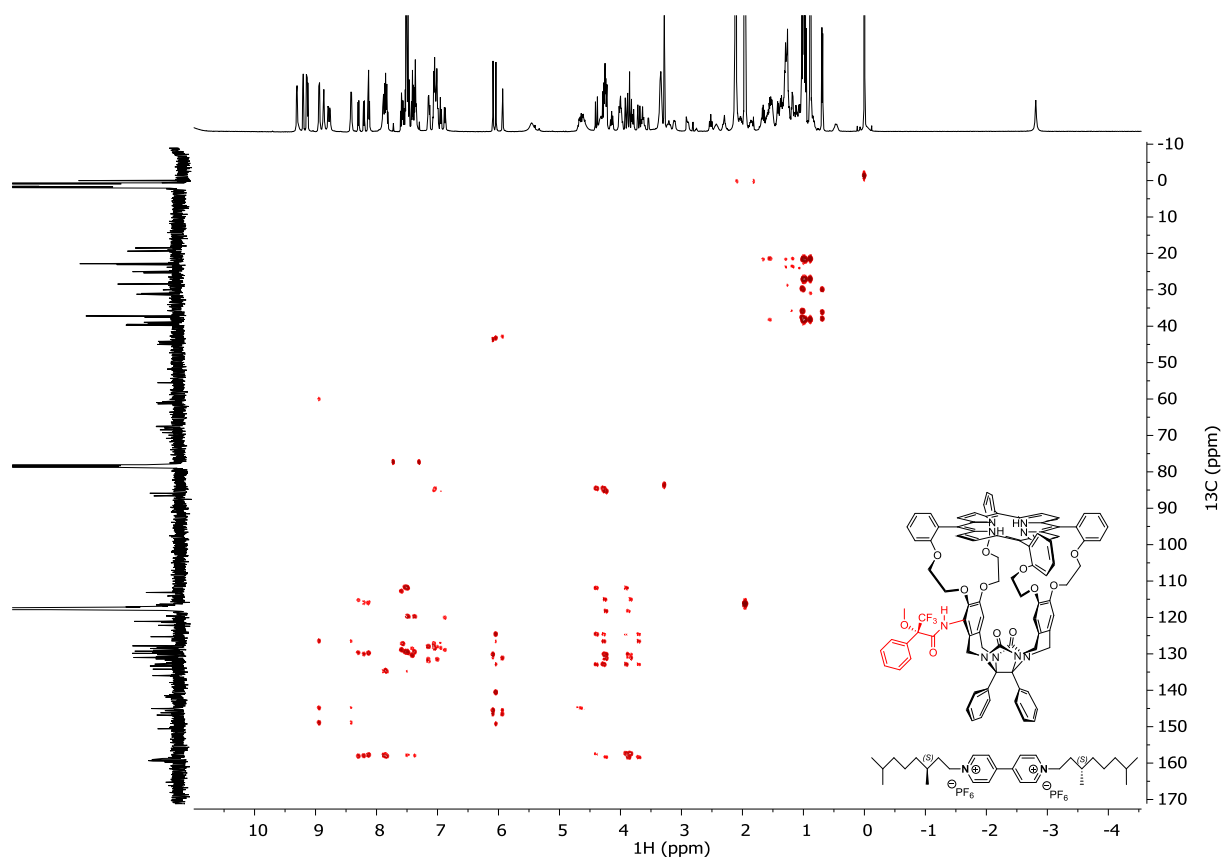

Figure S34.  $^1\text{H}$ - $^{13}\text{C}$  HMBC NMR spectrum (500 MHz, 298 K) of  $(R,S^*)$ -**H<sub>2</sub>4** complex with  $(S,S)$ -**V2** in  $\text{CDCl}_3$ :  $\text{D}_3\text{CCN}$ , (1:1 v/v).

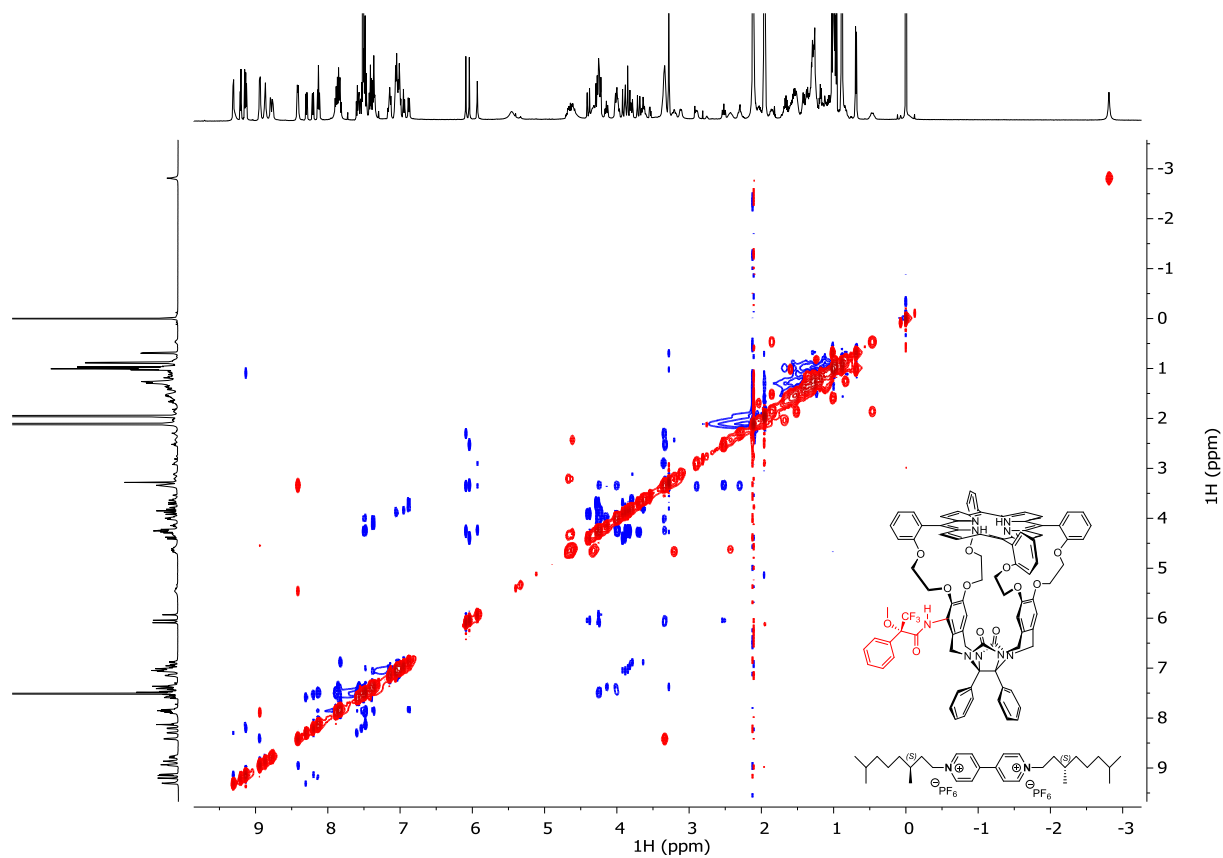

Figure S35.  $^1\text{H}$ - $^1\text{H}$  ROESY NMR spectrum (500 MHz, 298 K) of  $(R,S^*)\text{-H}_2\text{4}$  complex with  $(S,S)\text{-V}_2$  in  $\text{CDCl}_3$ :  $\text{D}_3\text{CCN}$ , (1:1 v/v).

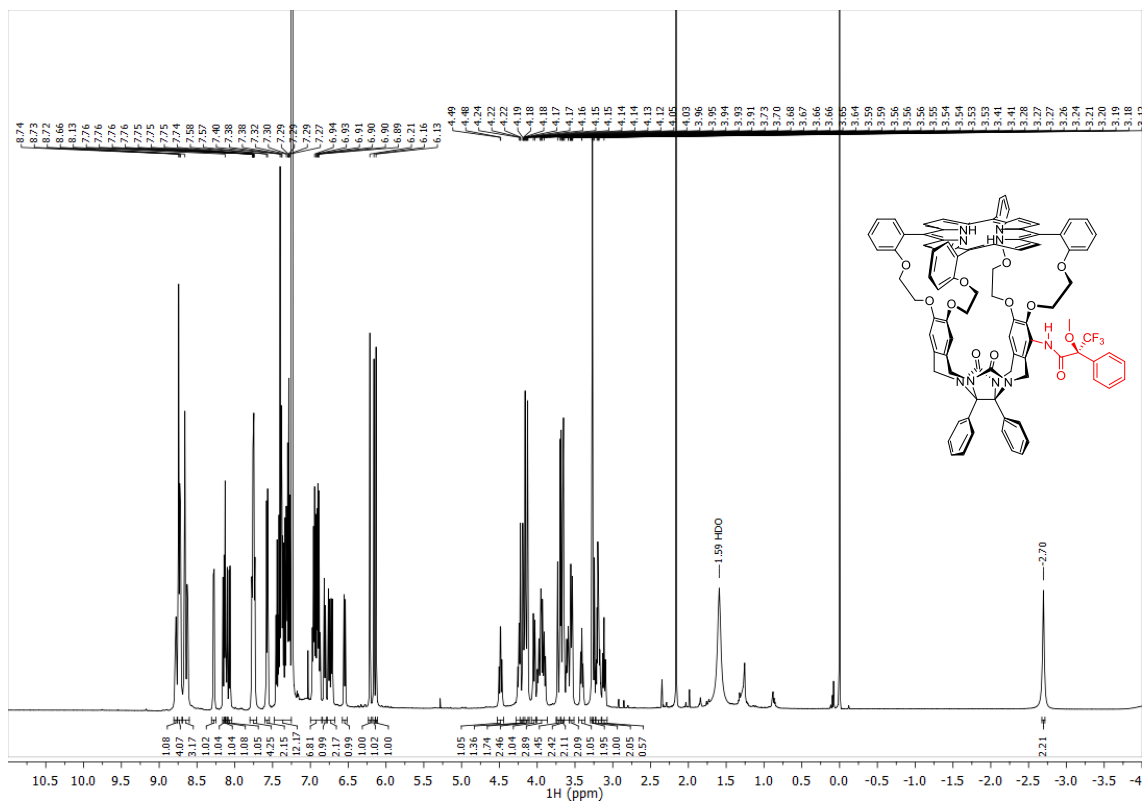

Figure S36. <sup>1</sup>H NMR spectrum (500 MHz, 298 K) of (*R,R<sub>p</sub>\**)-**H**<sub>25</sub> in CDCl<sub>3</sub>.



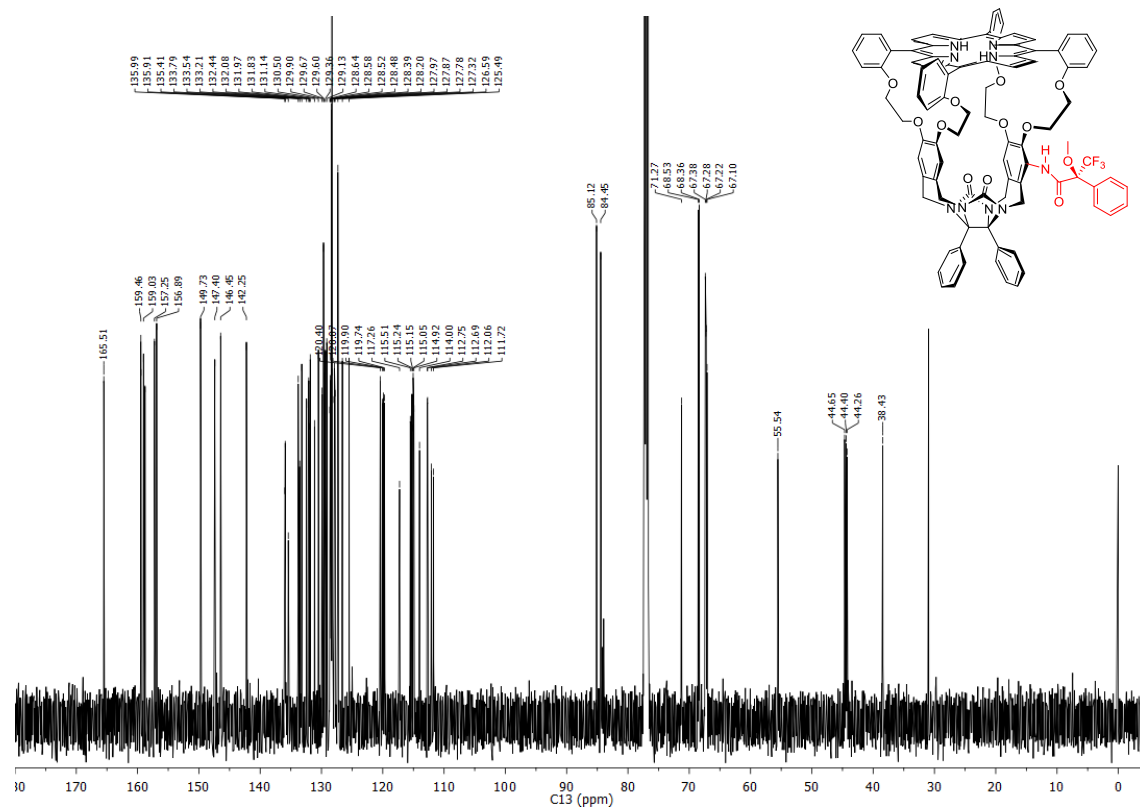

Figure S37.  $^{13}\text{C}\{^1\text{H}\}$  NMR spectrum (126 MHz, 298 K) of  $(R,R^*)\text{-H}_2\mathbf{5}$  in  $\text{CDCl}_3$ .

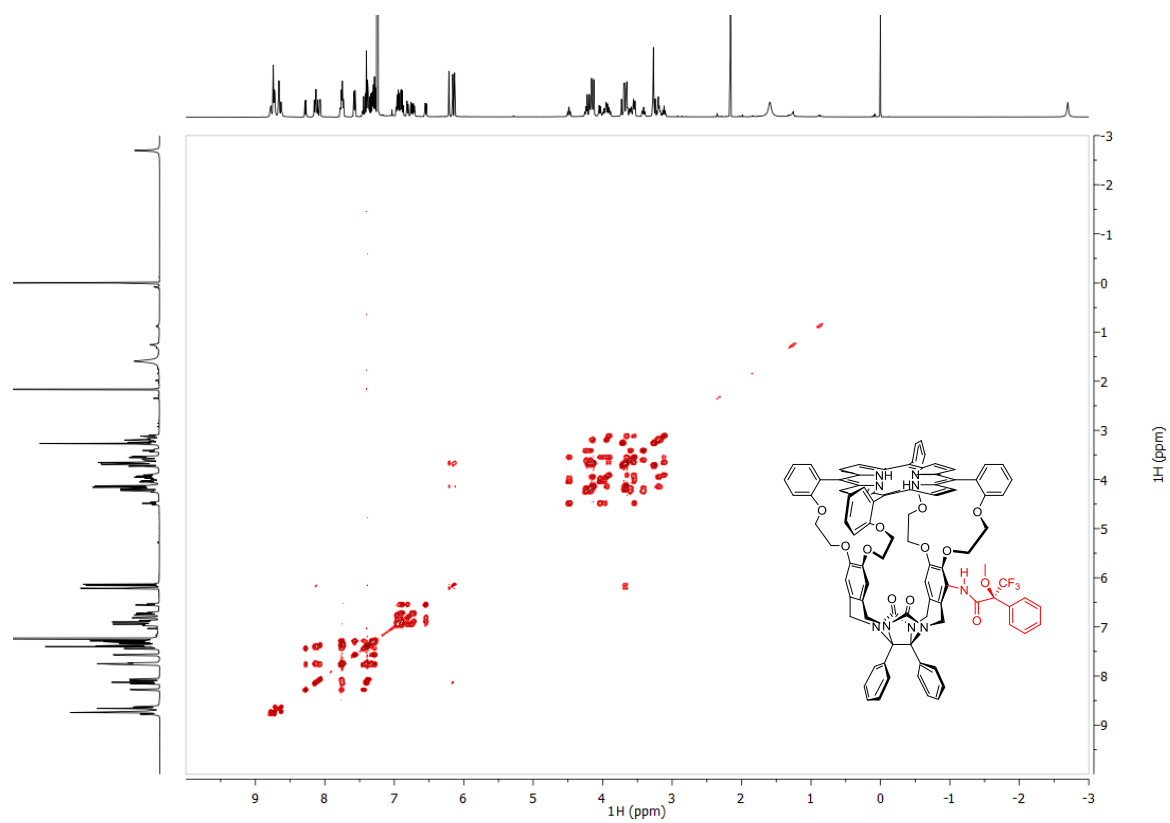

Figure S38.  $^1\text{H}$ - $^1\text{H}$  DQF-COSY NMR spectrum (500 MHz, 298 K) of  $(R,R_p)$ -**H25** in  $\text{CDCl}_3$ .

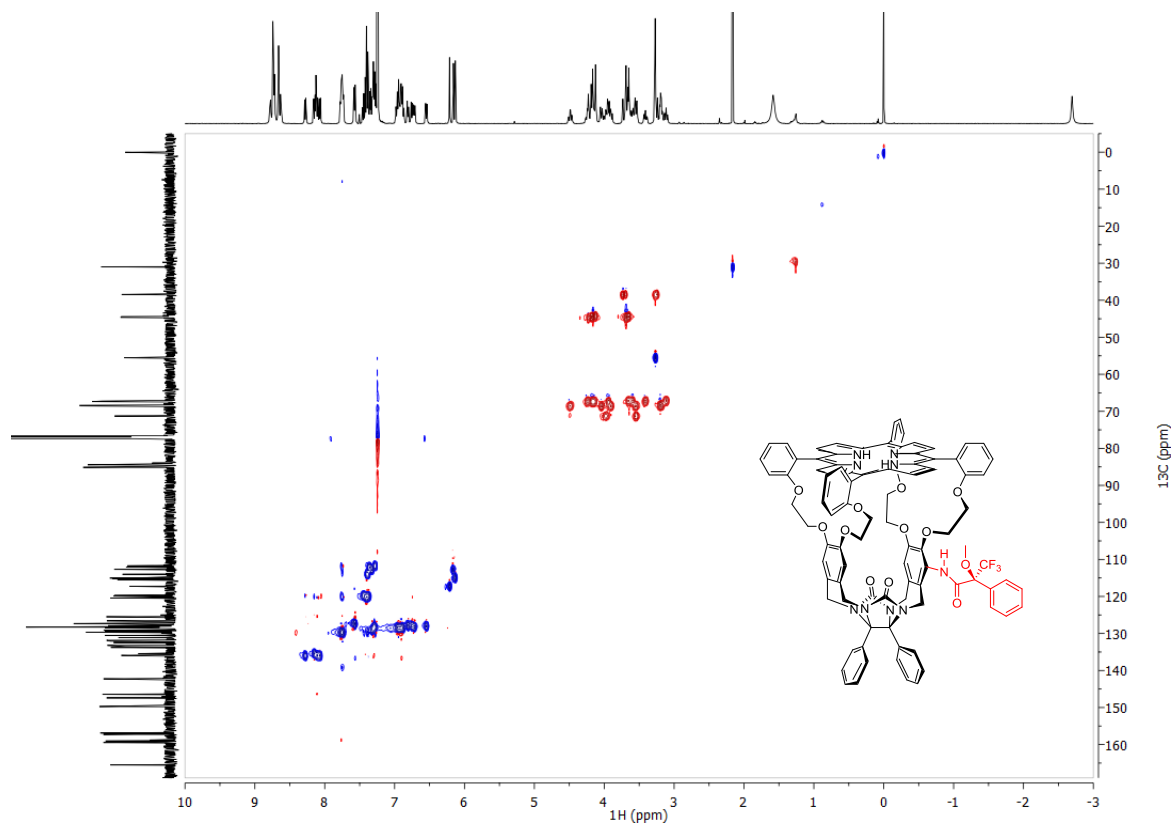

Figure S39.  $^1\text{H}$ - $^{13}\text{C}$  edited HSQC NMR spectrum (500 MHz, 298 K) of  $(R,R_p^*)\text{-H}_2\text{5}$  in  $\text{CDCl}_3$ .  $\text{CH}_2$  groups are indicated in blue and  $\text{CH}/\text{CH}_3$  groups in red.

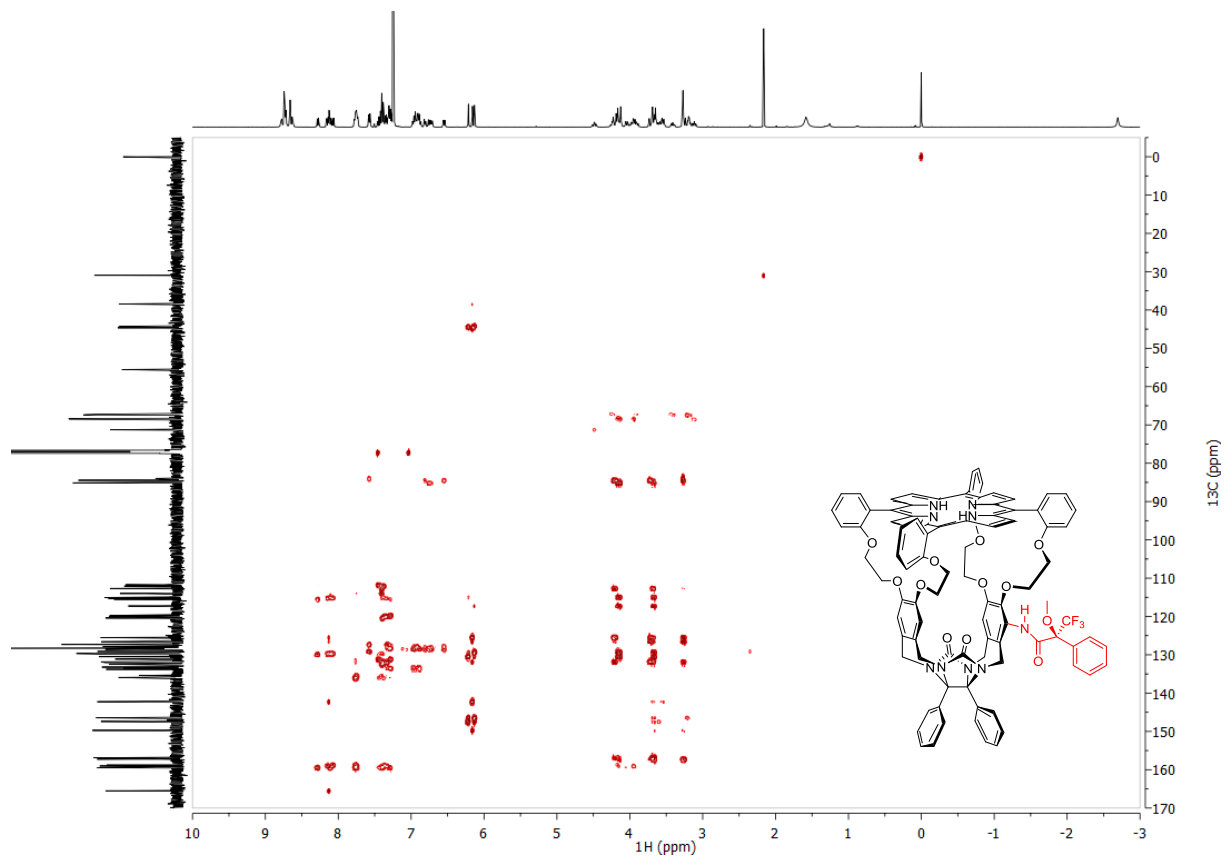

Figure S40.  $^1\text{H}$ - $^{13}\text{C}$  HMBC NMR spectrum (500 MHz, 298 K) of  $(R,R^*)\text{-H}_2\text{5}$  in  $\text{CDCl}_3$ .

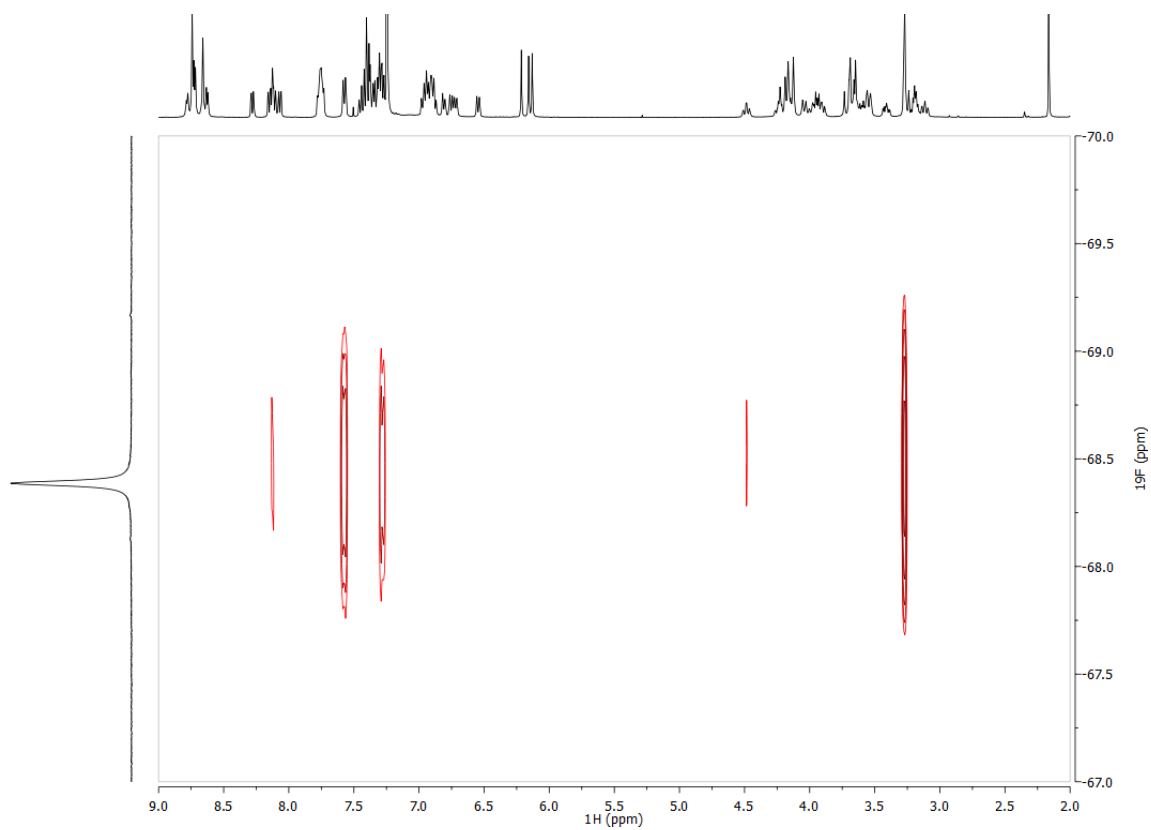

Figure S41.  $^1\text{H}$ - $^{19}\text{F}$  HOESY NMR spectrum (500 MHz, 298 K) of  $(R,R^*)$ -**H<sub>2</sub>5** in  $\text{CDCl}_3$ .

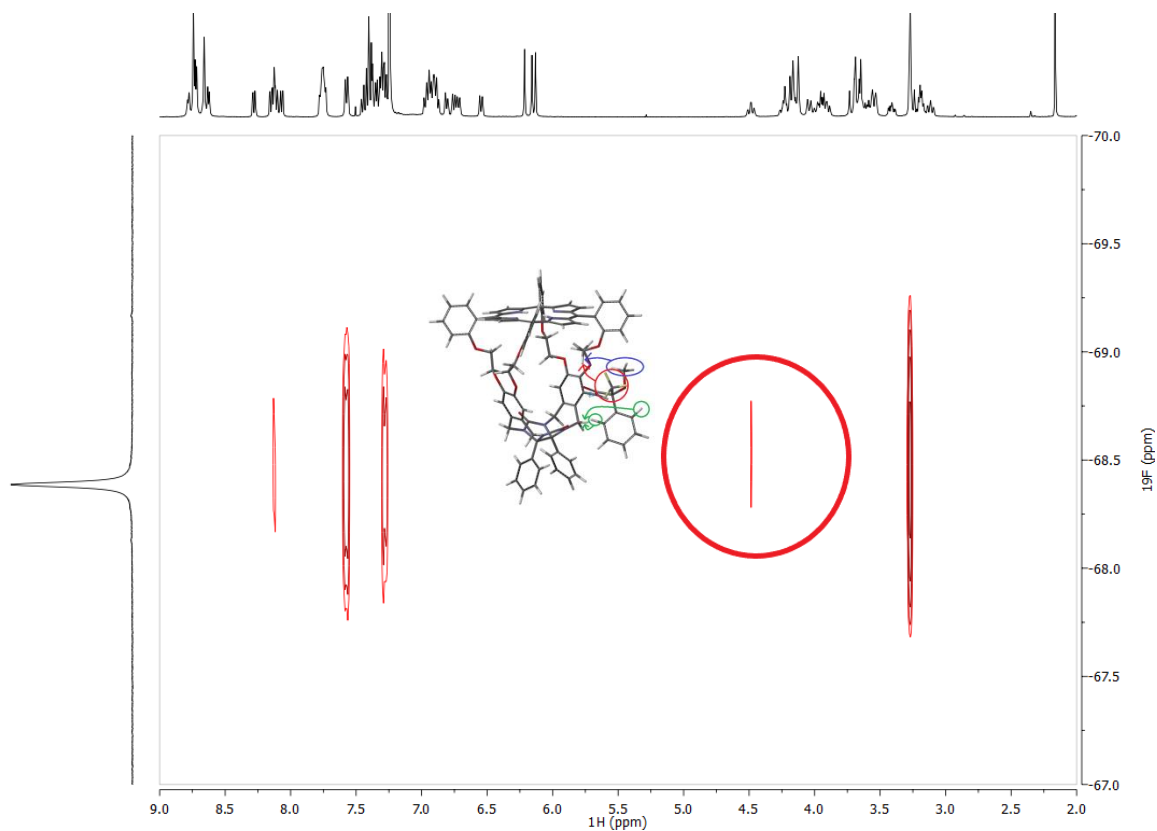

Figure S42.  $^1\text{H}$ - $^{19}\text{F}$  HOESY NMR spectrum (500 MHz, 298 K) of  $(R,R_p^*)\text{-H}_2\mathbf{5}$  in  $\text{CDCl}_3$ . (Key nOe contacts encircled).

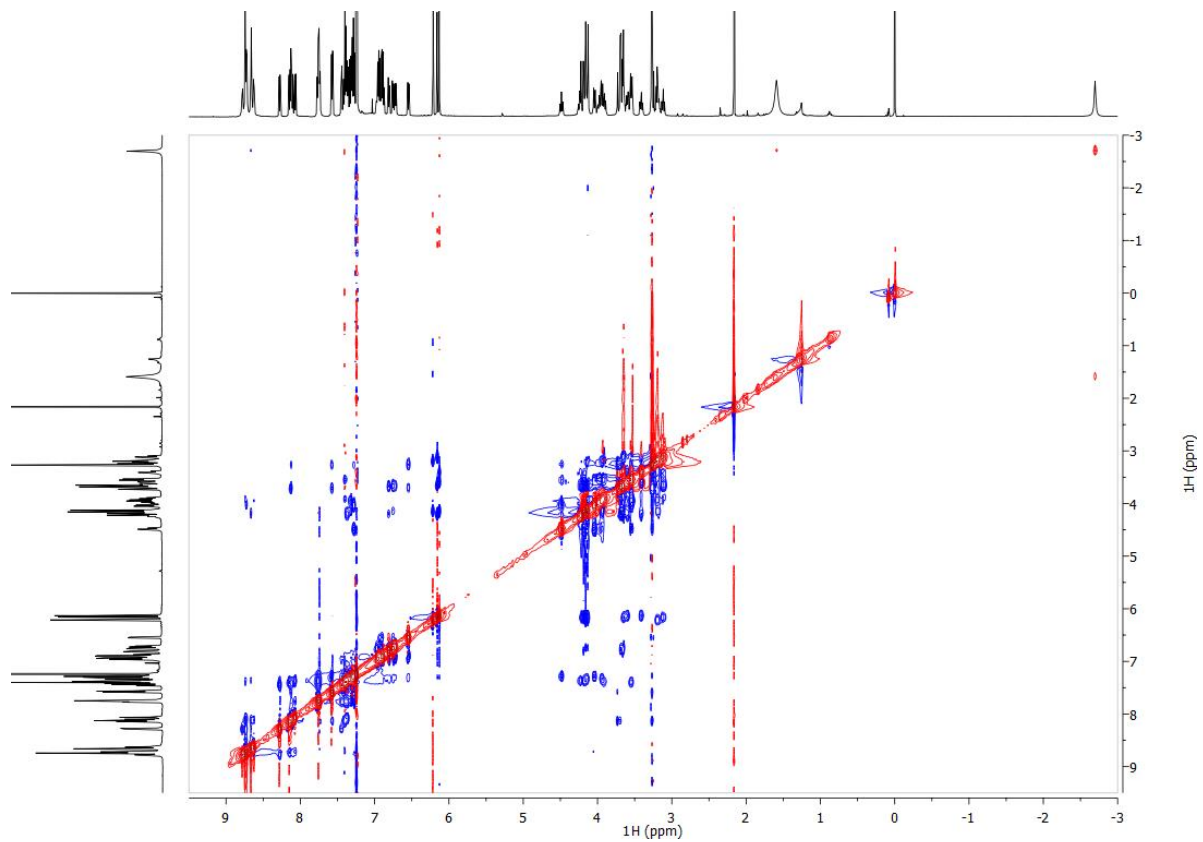

Figure S43.  $^1\text{H}$ - $^1\text{H}$  ROESY NMR spectrum (500 MHz, 298 K) of  $(R,R^*)\text{-H}_2\mathbf{5}$  in  $\text{CDCl}_3$ .

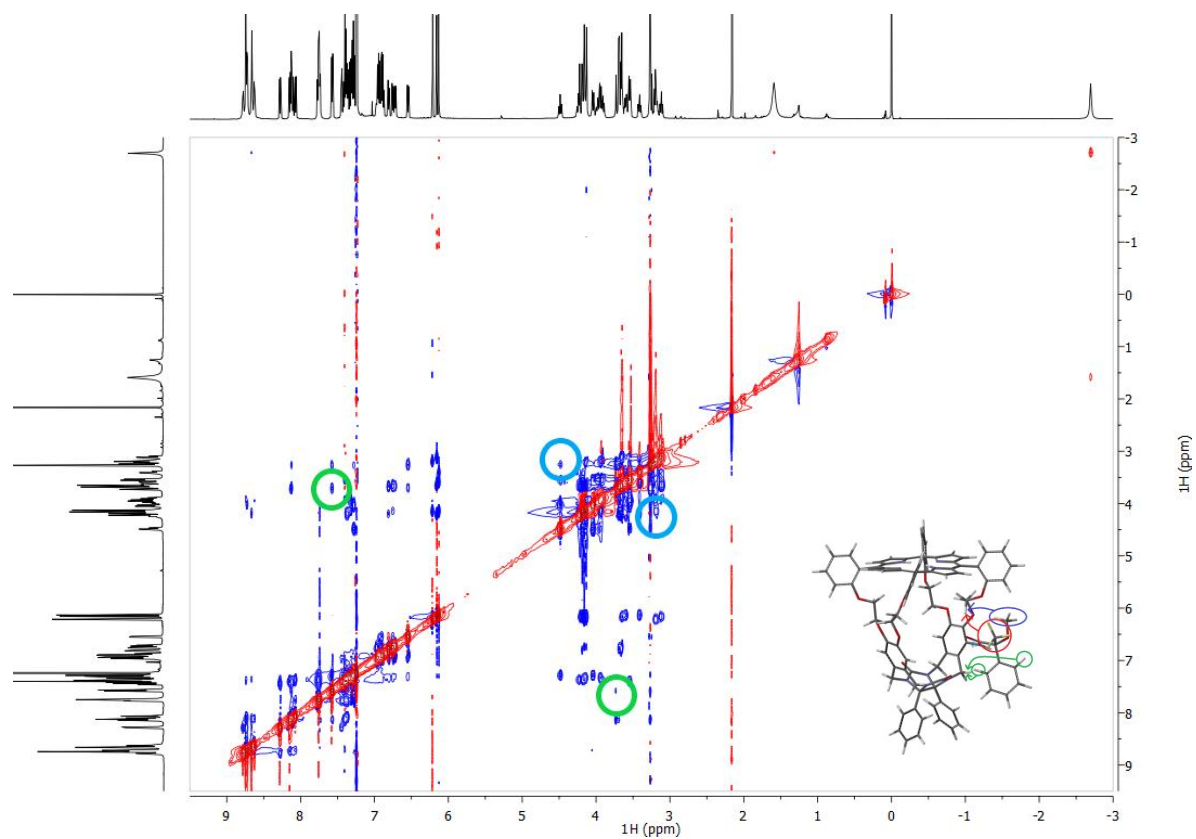

Figure S44.  $^1\text{H}$ - $^1\text{H}$  ROESY NMR spectrum (500 MHz, 298 K) of  $(R,R_p^*)\text{-H}_2\mathbf{5}$  in  $\text{CDCl}_3$ . (Key nOe contacts encircled).



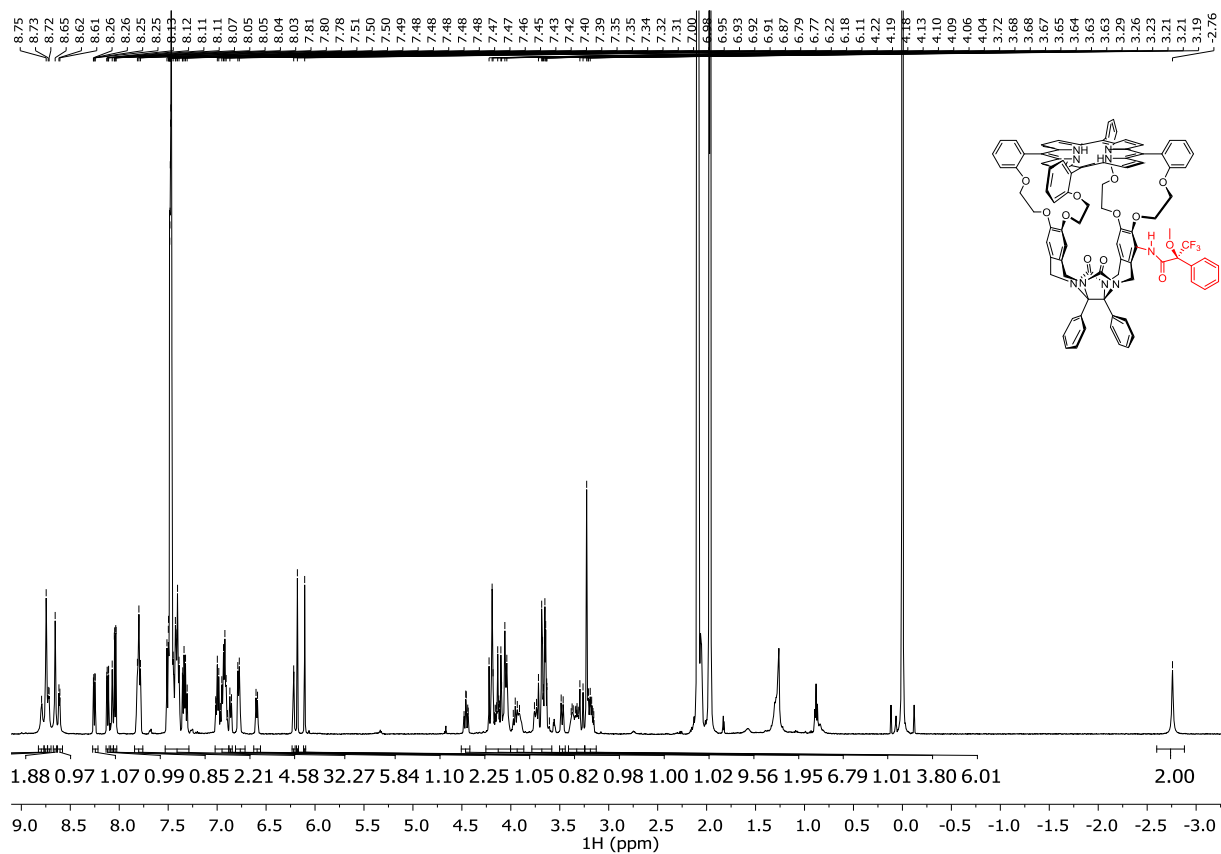

Figure S45. <sup>1</sup>H NMR spectrum (500 MHz, 298 K) of (R,R\*)-H<sub>2</sub>5 in CDCl<sub>3</sub>: D<sub>3</sub>CCN, (1:1 v/v).

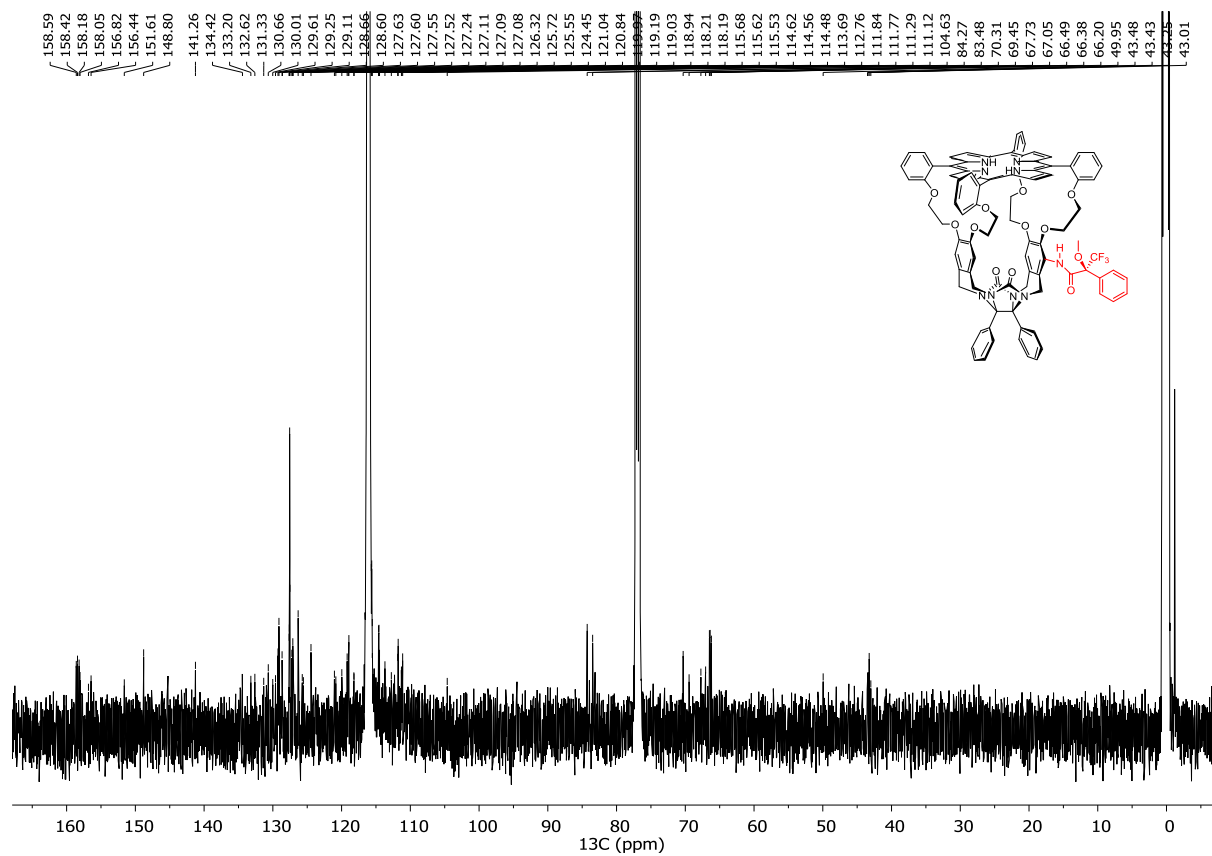

Figure S46.  $^{13}\text{C}\{^1\text{H}\}$  NMR spectrum (126 MHz, 298 K) of  $(R,R^*)\text{-H}_2\text{5}$  in  $\text{CDCl}_3$ :  $\text{D}_3\text{CCN}$ , (1:1 v/v).

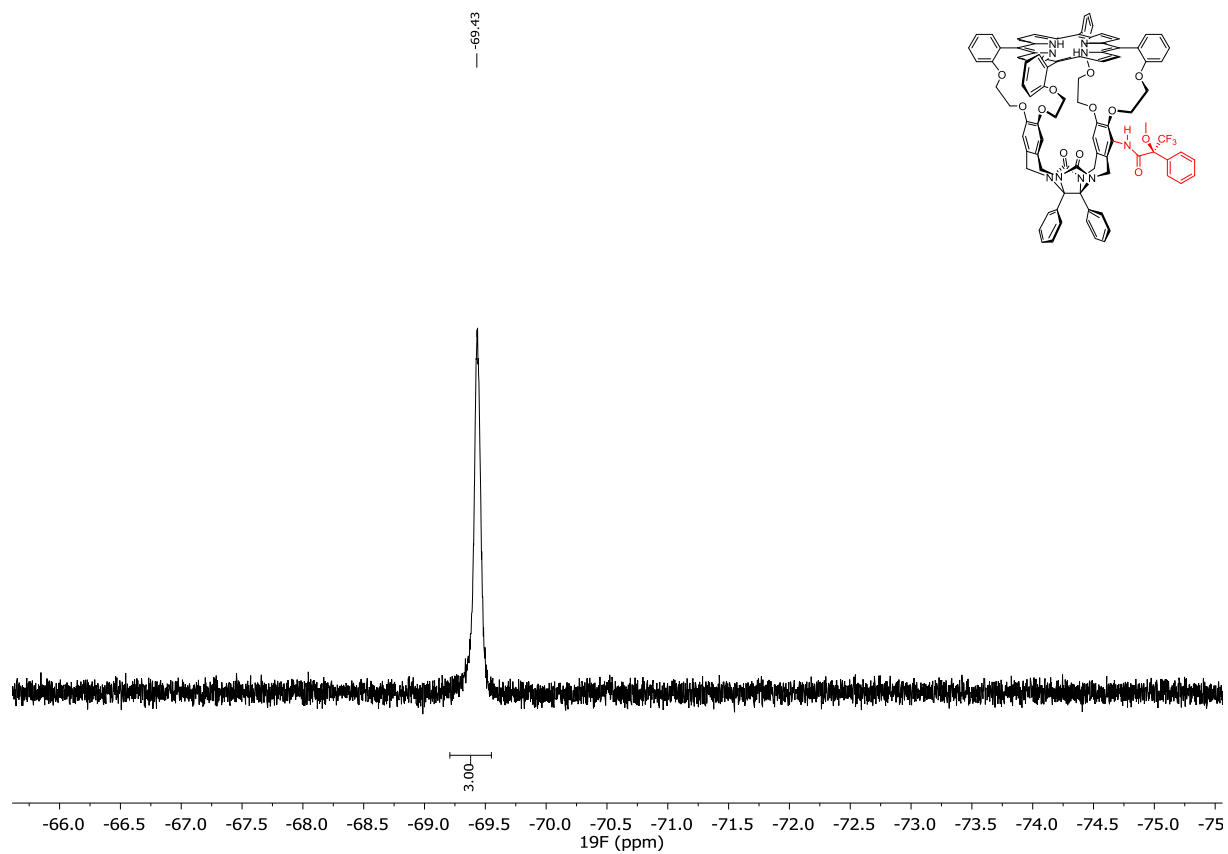

Figure S47.  $^{19}\text{F}$  NMR spectrum (471 MHz, 298 K) of  $(R,R^*)\text{-H}_2\text{5}$   $\text{CDCl}_3$ :  $\text{D}_3\text{CCN}$ , (1:1 v/v).

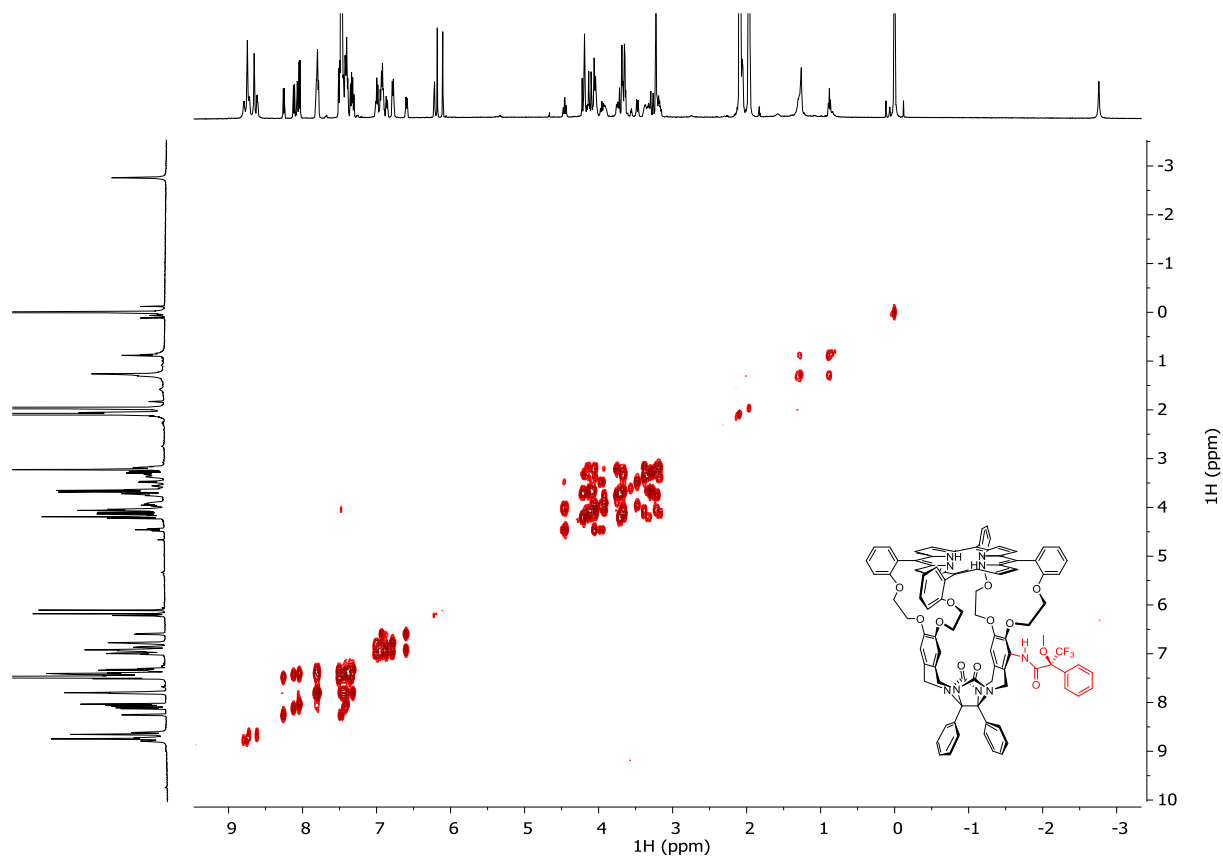

Figure S48.  $^1\text{H}$ - $^1\text{H}$  DQF-COSY NMR spectrum (500 MHz, 298 K) of (*R,R*\*)-**H<sub>2</sub>5** in  $\text{CDCl}_3$ :  $\text{D}_3\text{CCN}$ , (1:1 v/v).

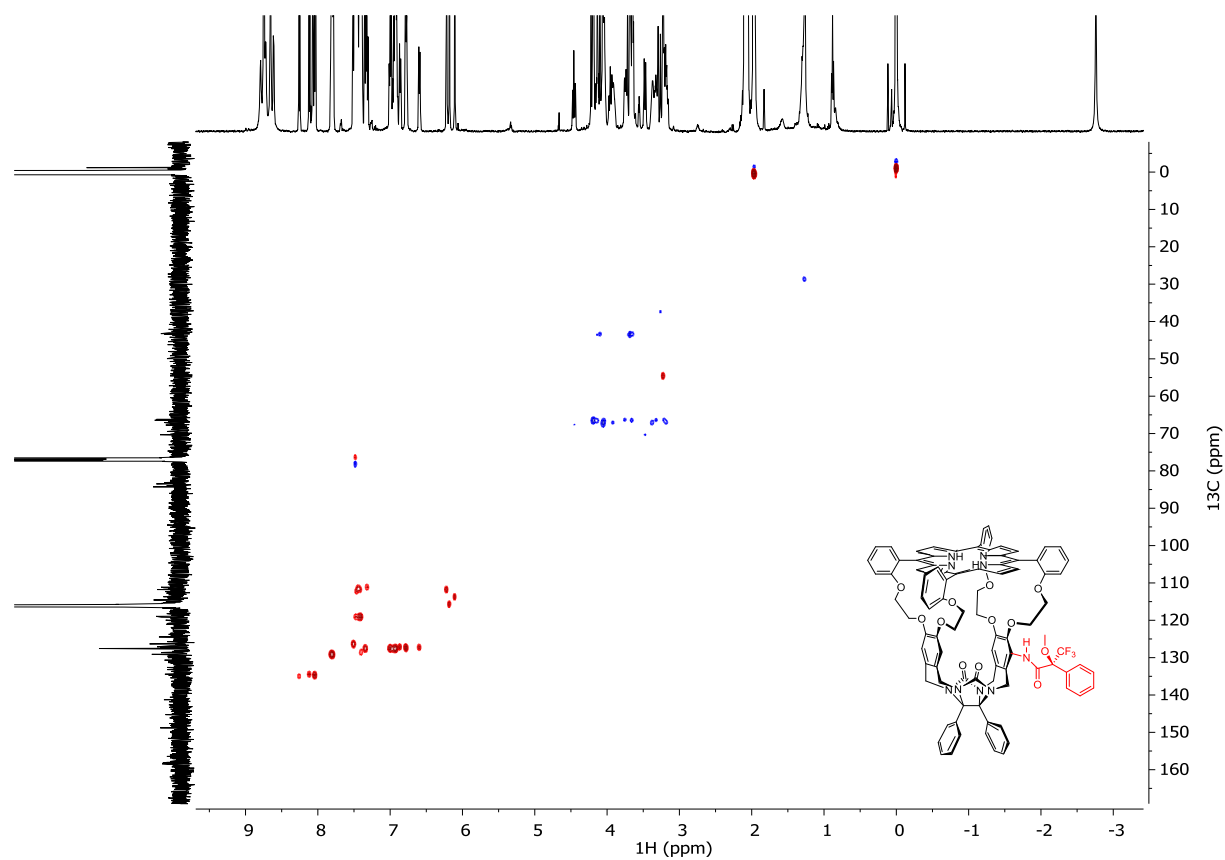

Figure S49.  $^1\text{H}$ - $^{13}\text{C}$  edited HSQC NMR spectrum (500 MHz, 298 K) of  $(R,R^*)\text{-H}_2\text{5}$  in  $\text{CDCl}_3$ :  $\text{D}_3\text{CCN}$ , (1:1 v/v).  $\text{CH}_2$  groups are indicated in blue and  $\text{CH}/\text{CH}_3$  groups in red.

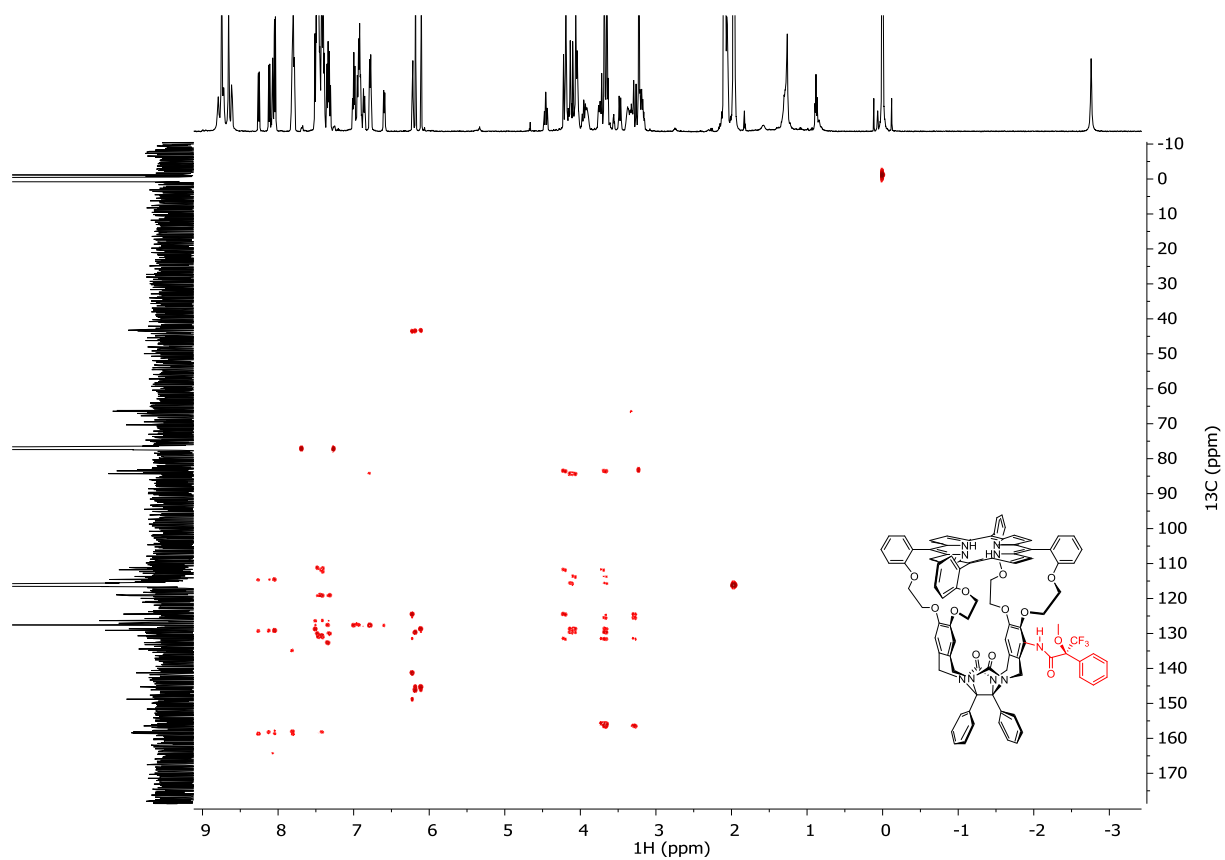

Figure S50. <sup>1</sup>H-<sup>13</sup>C HMBC NMR spectrum (500 MHz, 298 K) of (*R,R*\*)-**H<sub>2</sub>5** in CDCl<sub>3</sub>:D<sub>3</sub>CCN, (1:1 v/v).

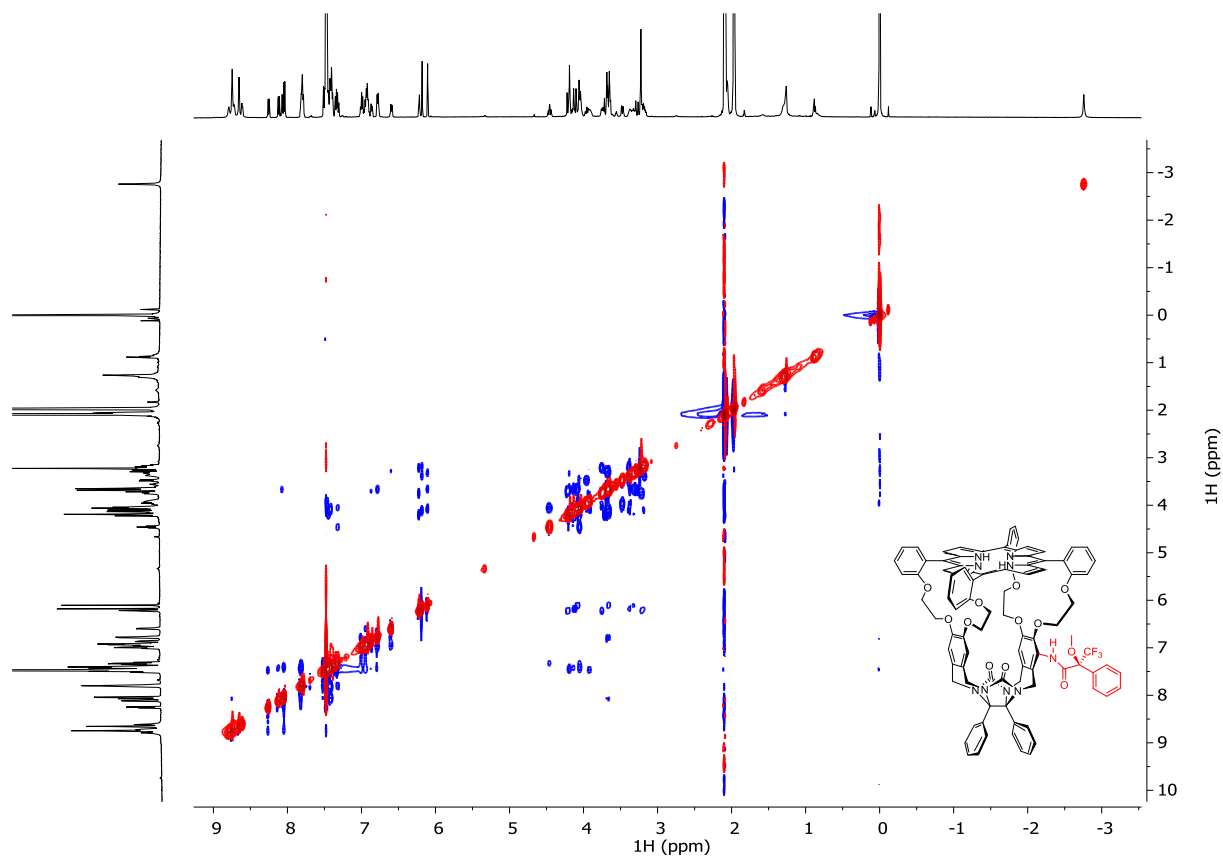

Figure S51.  $^1\text{H}$ - $^1\text{H}$  ROESY NMR spectrum (500 MHz, 298 K) of  $(R,R^*)\text{-H}_2\text{5}$  in  $\text{CDCl}_3$ :  
 $\text{D}_3\text{CCN}$ , (1:1 v/v).

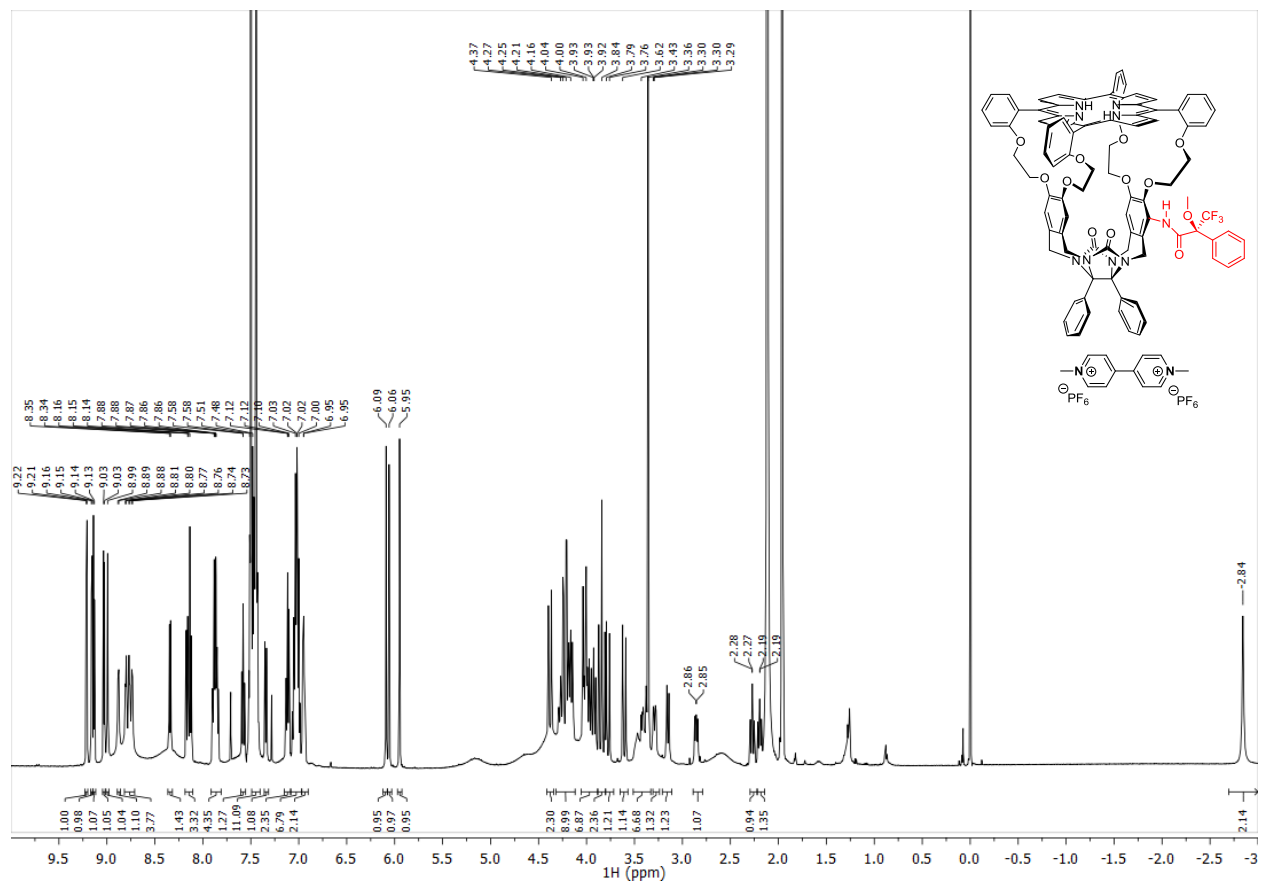

Figure S52.  $^1\text{H}$  NMR spectrum (500 MHz, 298 K) of the  $(R,R)$ - $\text{H}_25$  complex with **V1** in  $\text{CDCl}_3: \text{D}_3\text{CCN}$ , (1:1 v/v).



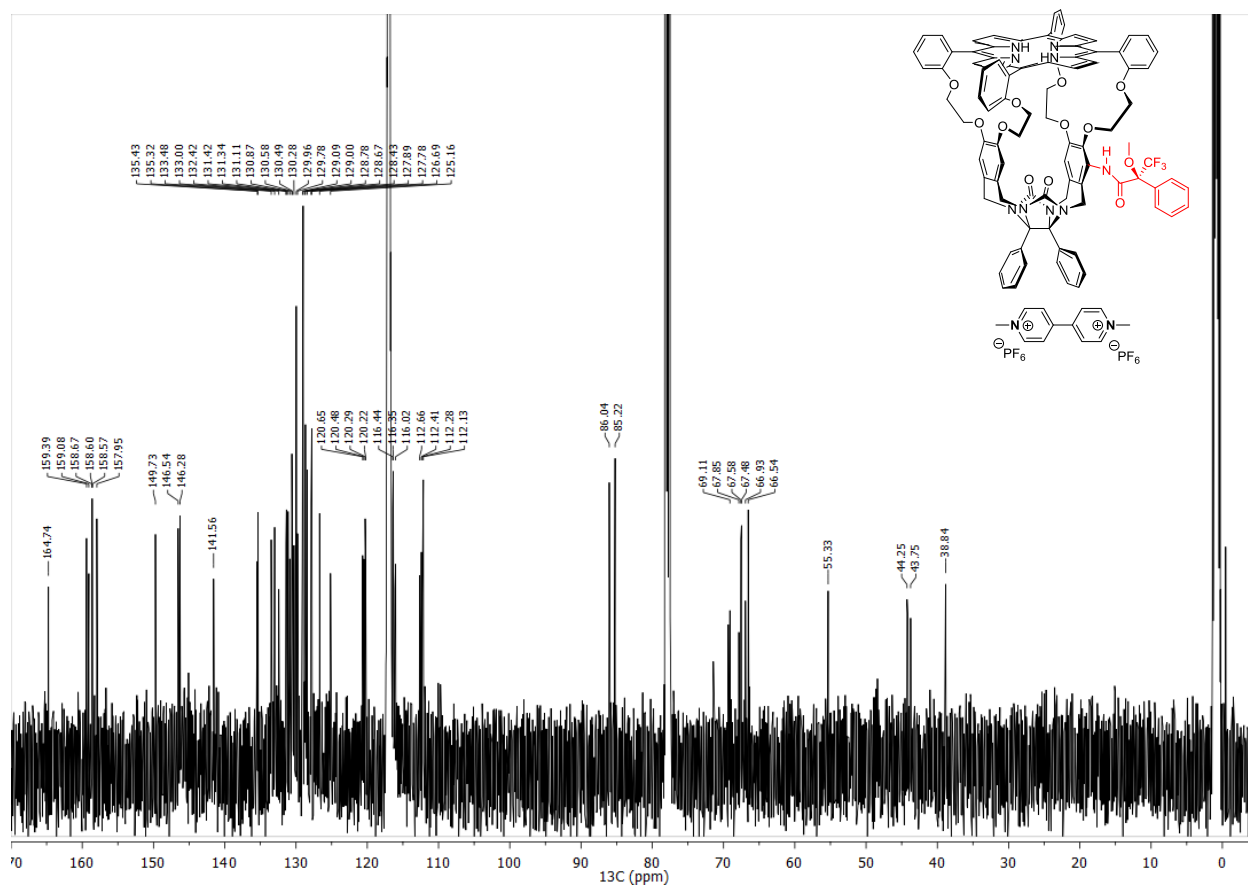

Figure S53.  $^{13}\text{C}\{^1\text{H}\}$  NMR spectrum (126 MHz, 298 K) of the (*R,R*\*)-**H<sub>2</sub>5** complex with **V1** in  $\text{CDCl}_3$ :  $\text{D}_3\text{CCN}$ , (1:1 v/v).

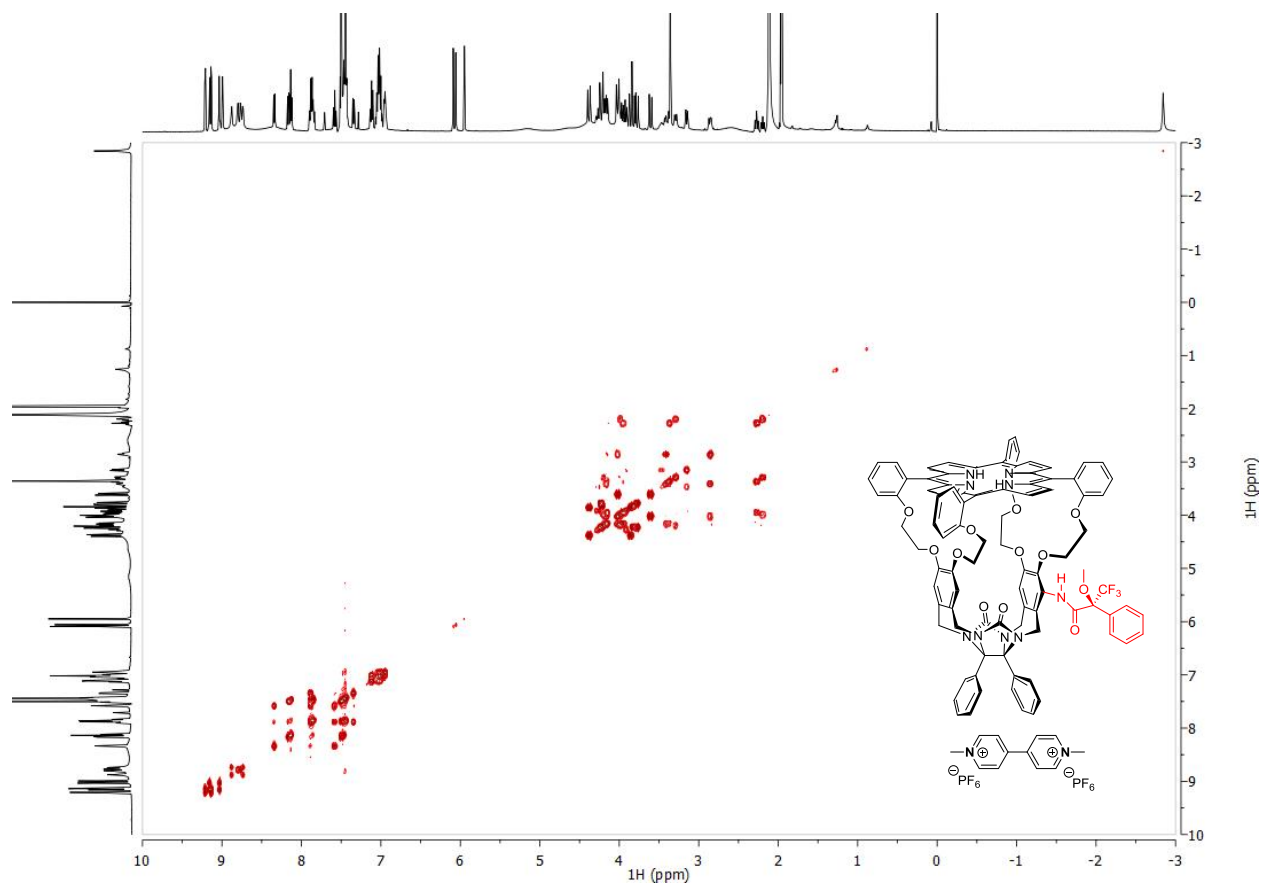

Figure S54.  $^1\text{H}$ - $^1\text{H}$  COSY NMR spectrum (500 MHz, 298 K) of the (*R,R*<sup>\*</sup>)-**H**<sub>25</sub> complex with **V1** in  $\text{CDCl}_3$ :  $\text{D}_3\text{CCN}$ , (1:1 v/v).

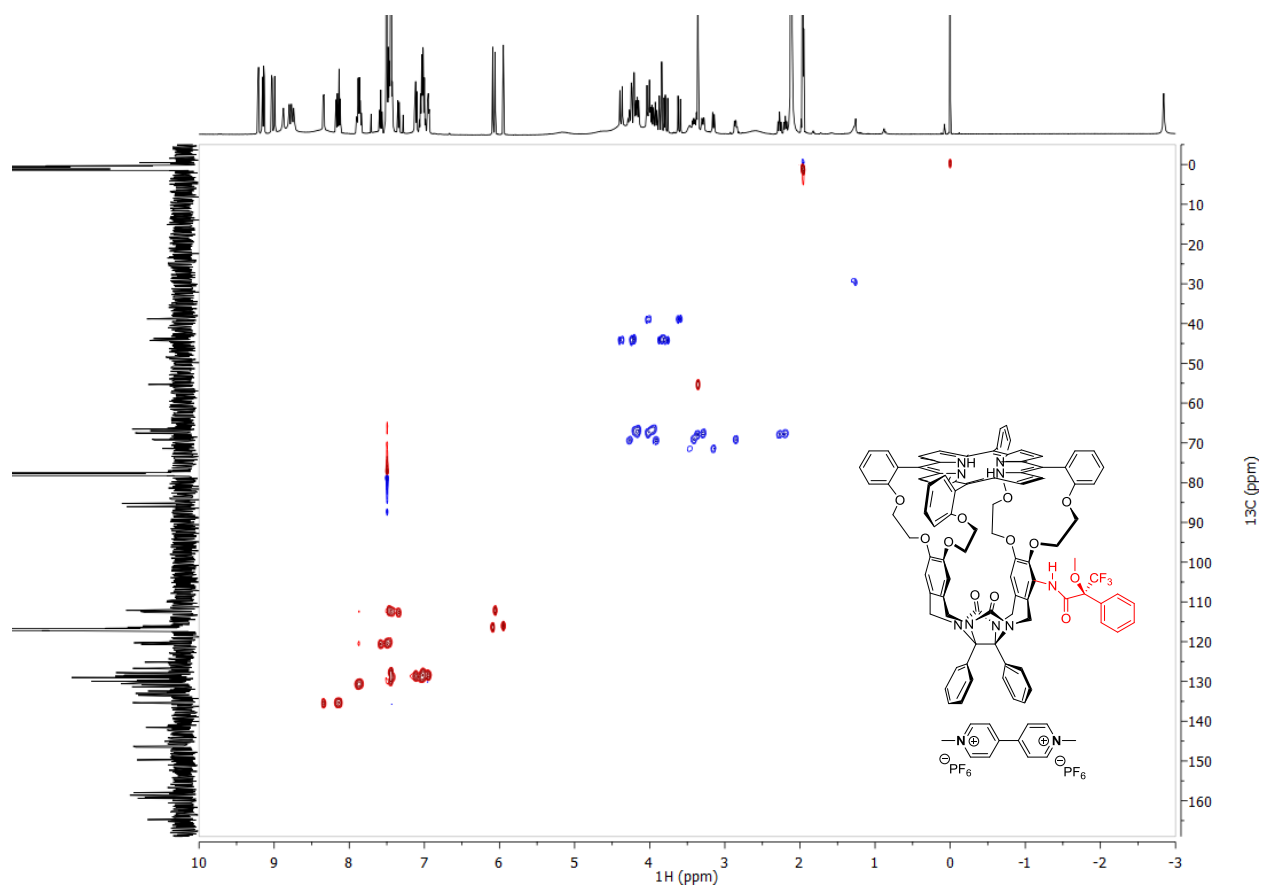

Figure S55.  $^1\text{H}$ - $^{13}\text{C}$  HSQC edited NMR spectrum (500 MHz, 298 K) of the  $(R,R^*)\text{-H}_2\text{5}$  complex with **V1** in  $\text{CDCl}_3$ :  $\text{D}_3\text{CCN}$ , (1:1 v/v).  $\text{CH}_2$  groups are indicated in blue and  $\text{CH/CH}_3$  groups in red.

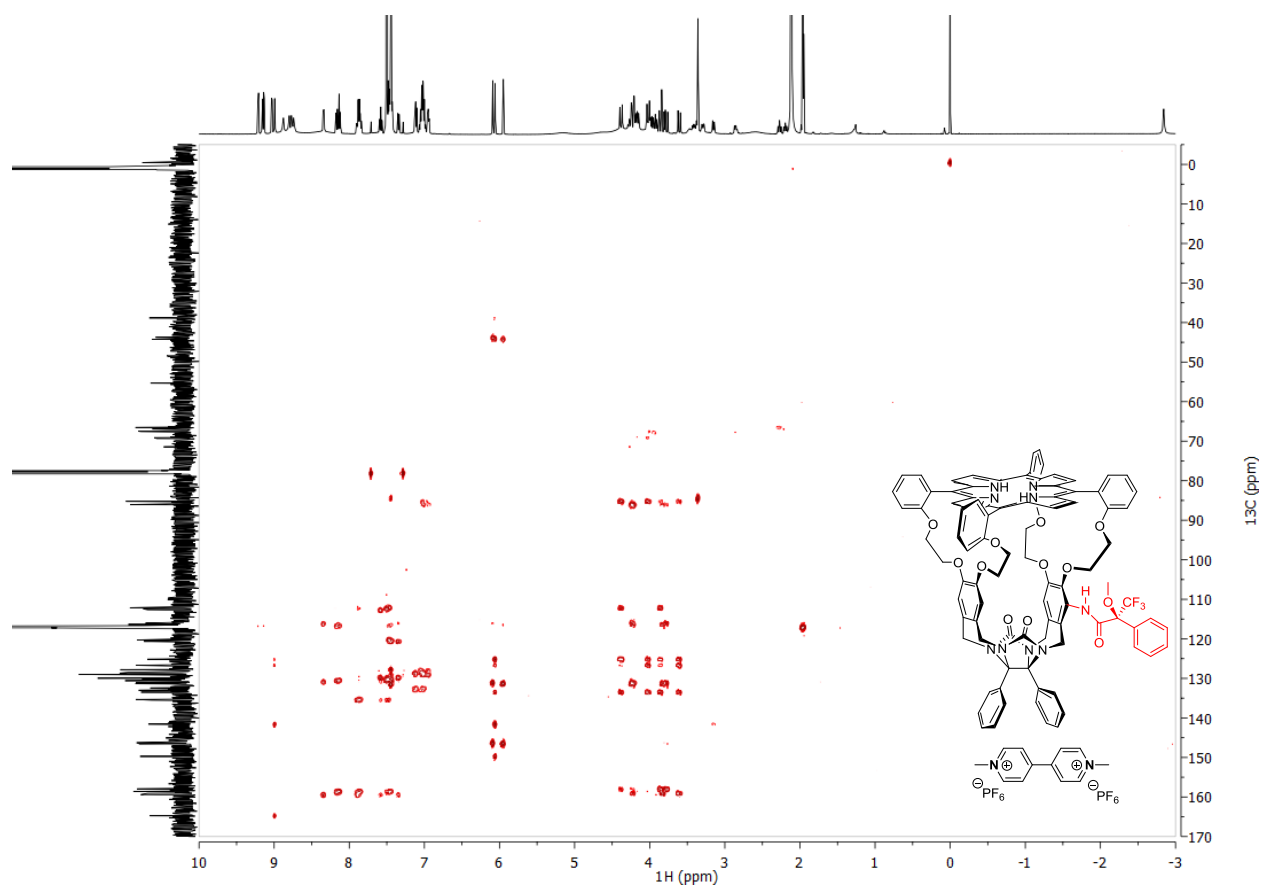

Figure S56.  $^1\text{H}$ - $^{13}\text{C}$  HMBC NMR spectrum (500 MHz, 298 K) of the (*R,R*\*)-**H<sub>2</sub>5** complex with **V1** in  $\text{CDCl}_3$ :  $\text{D}_3\text{CCN}$ , (1:1 v/v).

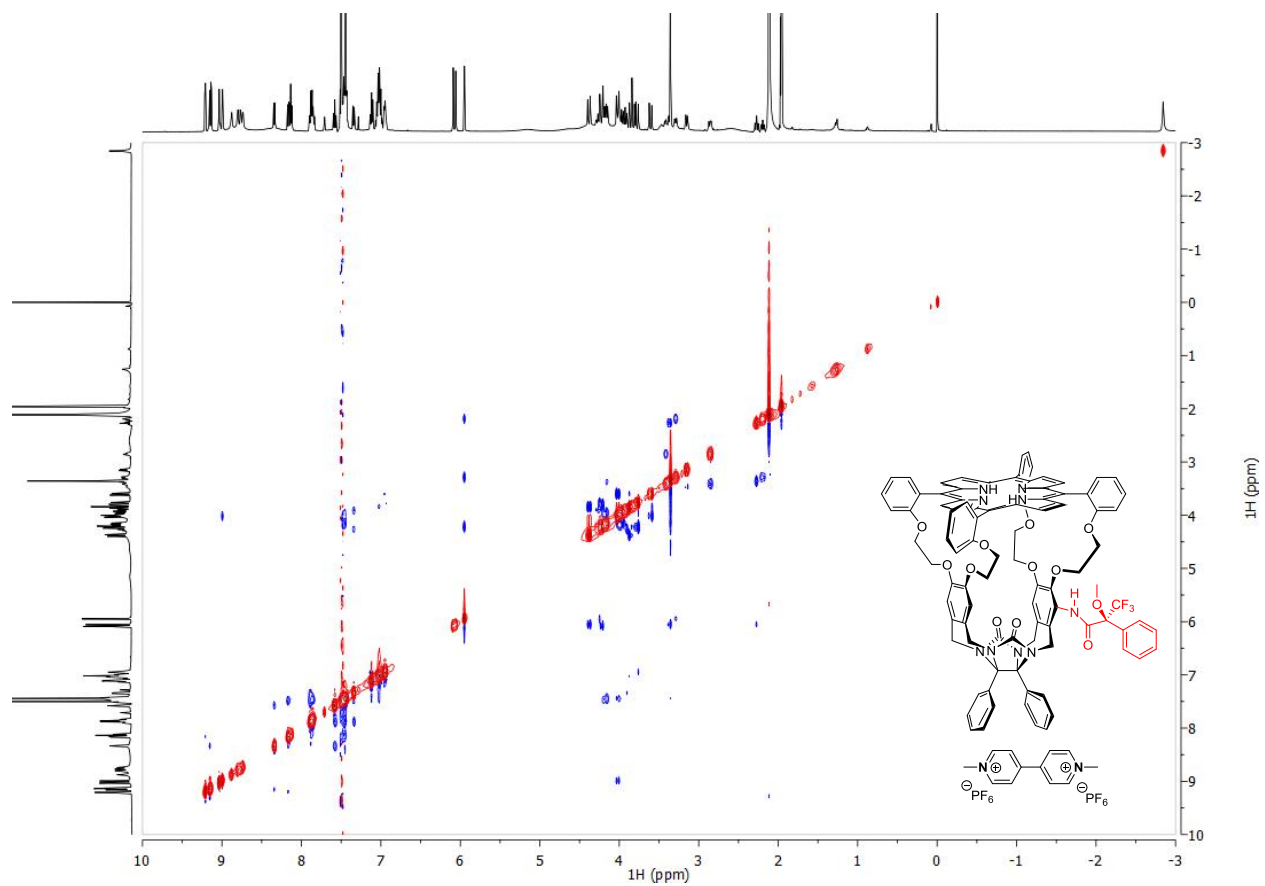

Figure S57.  $^1\text{H}$ - $^1\text{H}$  ROESY NMR spectrum (500 MHz, 298 K) of the  $(R,R^*)$ -**H**<sub>25</sub> complex with **V****1** in  $\text{CDCl}_3$ :  $\text{D}_3\text{CCN}$ , (1:1 v/v).

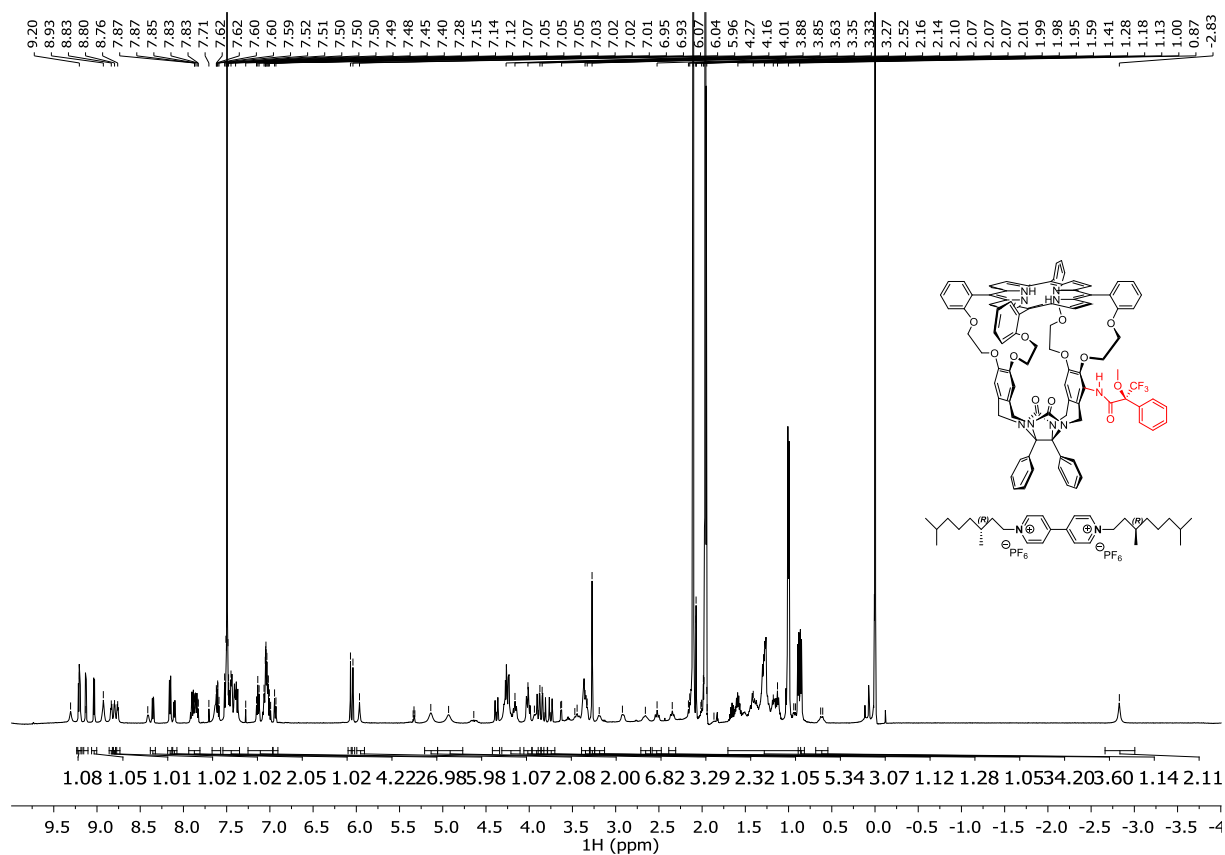

Figure S58.  $^1\text{H}$  NMR spectrum (500 MHz, 298 K) of  $(R,R^*)\text{-H}_2\text{5}$  complex with  $(R,R)\text{-V2}$  in  $\text{CDCl}_3$ :  $\text{D}_3\text{CCN}$ , (1:1 v/v).

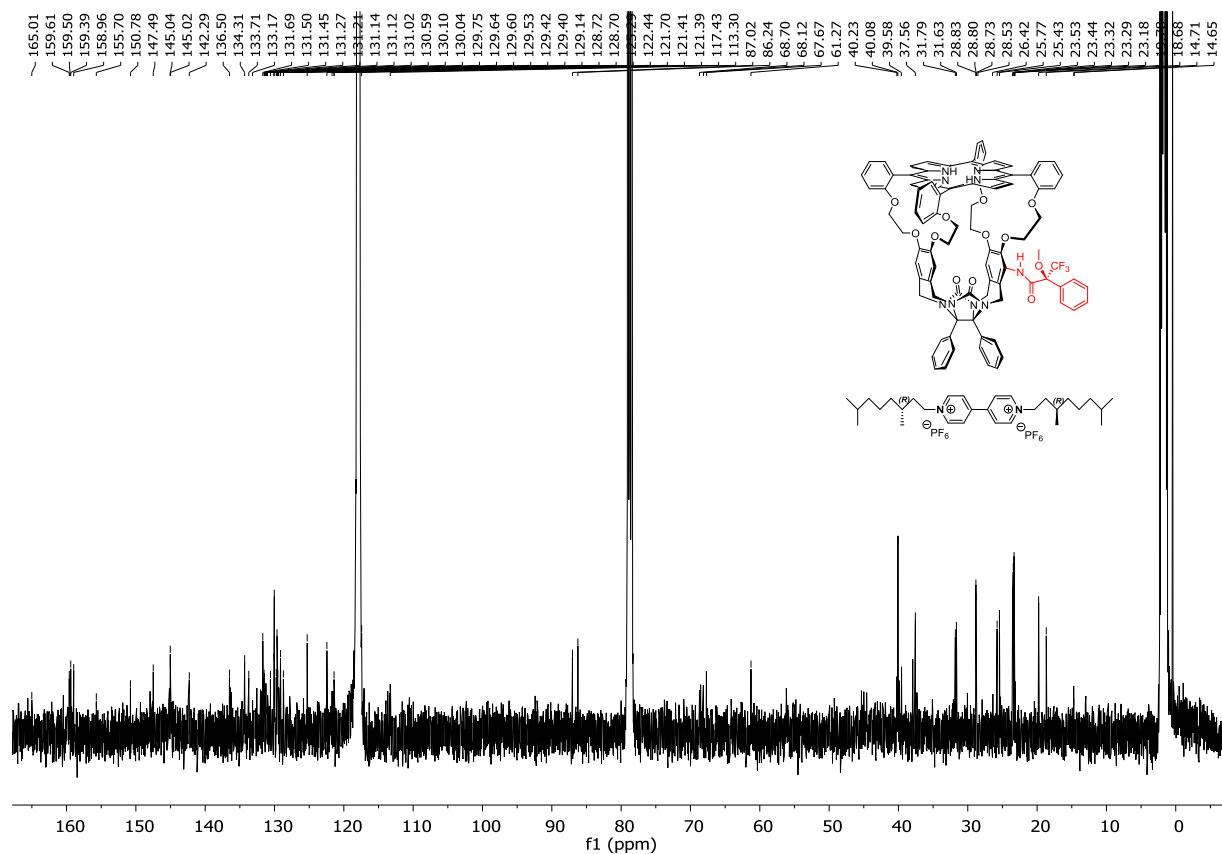

Figure S59.  $^{13}\text{C}\{^1\text{H}\}$  NMR spectrum (126 MHz, 298 K) of  $(R,R^*)\text{-H}_2\mathbf{5}$  complex with  $(R,R)\text{-V}\mathbf{2}$  in  $\text{CDCl}_3: \text{D}_3\text{CCN}$ , (1:1 v/v).

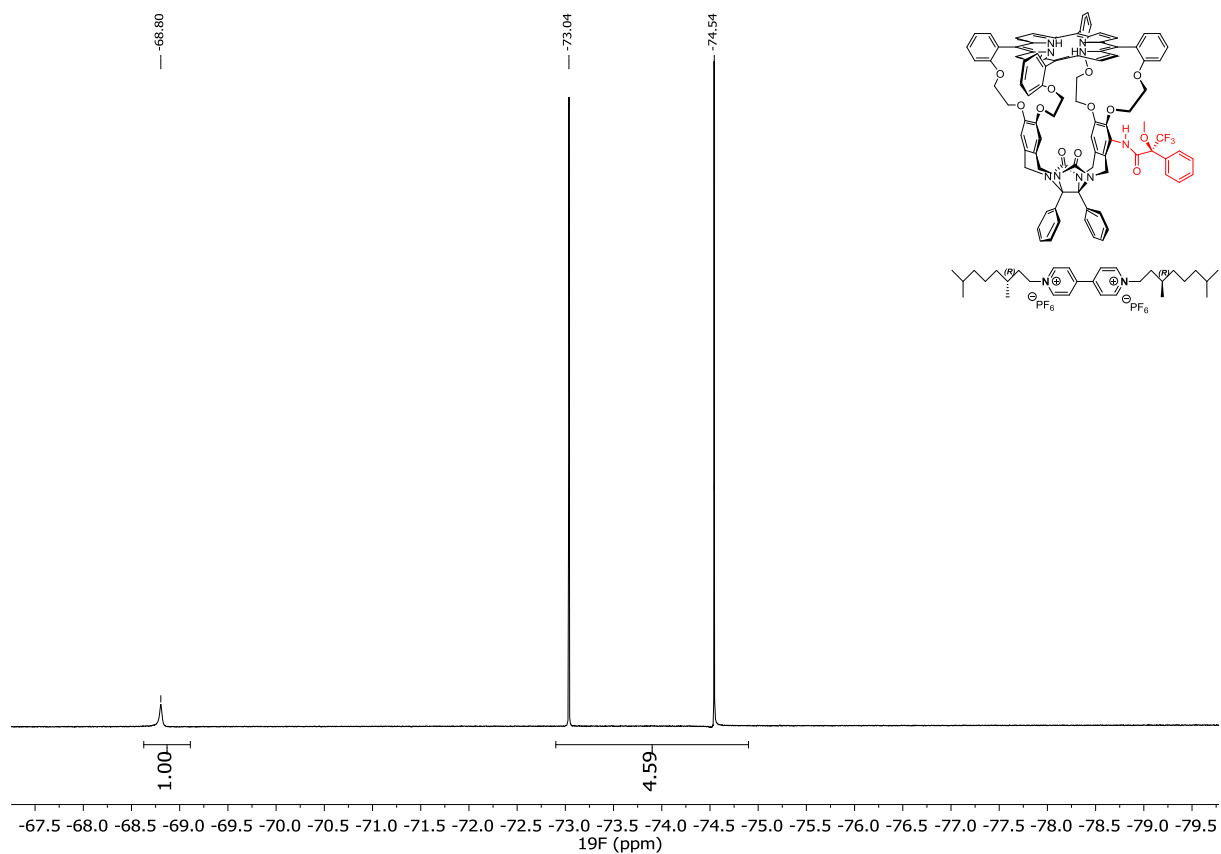

Figure S60.  $^{19}\text{F}$  NMR spectrum (471 MHz, 298 K) of  $(R,R^*)$ -H<sub>2</sub>5 complex with  $(R,R)$ -V2 in  $\text{CDCl}_3$ :  $\text{D}_3\text{CCN}$ , (1:1 v/v).



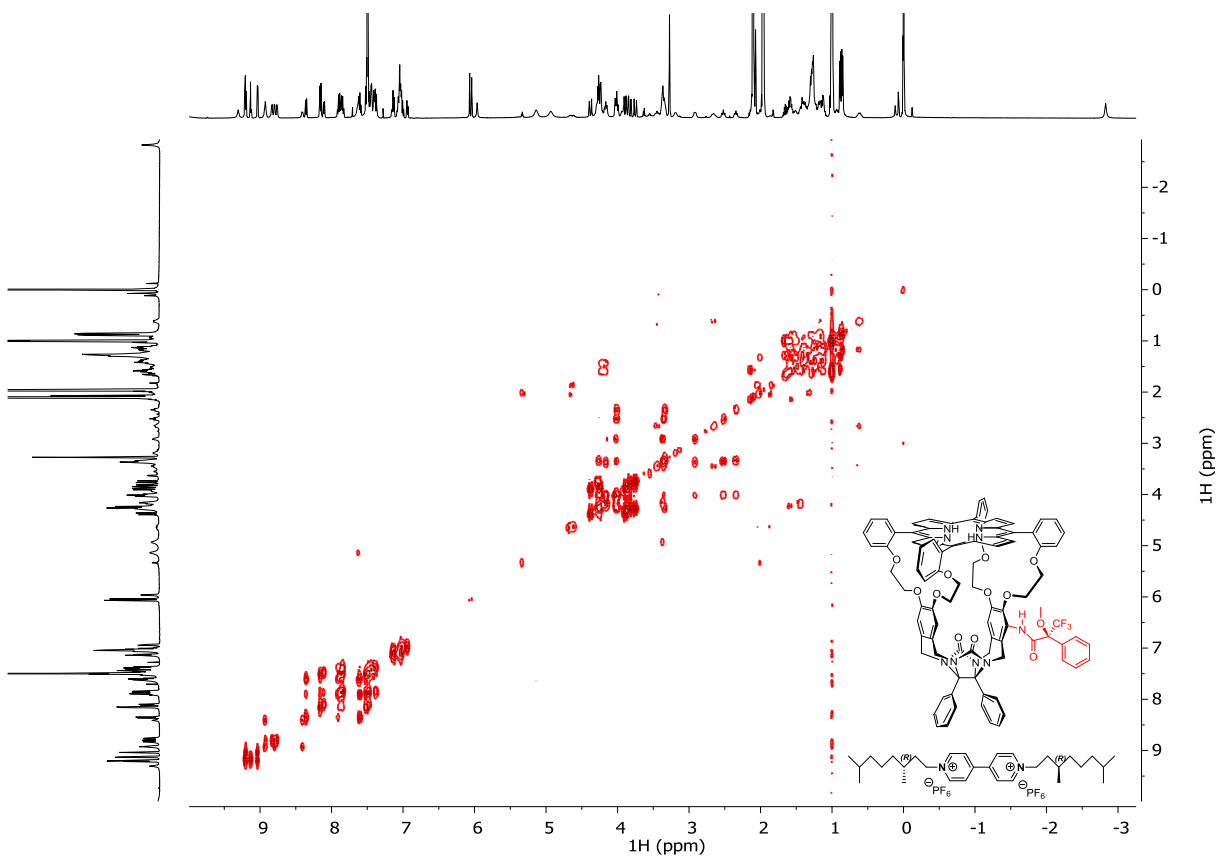

Figure S61.  $^1\text{H}$ - $^1\text{H}$  DQF-COSY NMR spectrum (500 MHz, 298 K) of  $(R,R^*)$ -**H<sub>2</sub>5** complex with  $(R,R)$ -**V2** in  $\text{CDCl}_3$ :  $\text{D}_3\text{CCN}$ , (1:1 v/v).

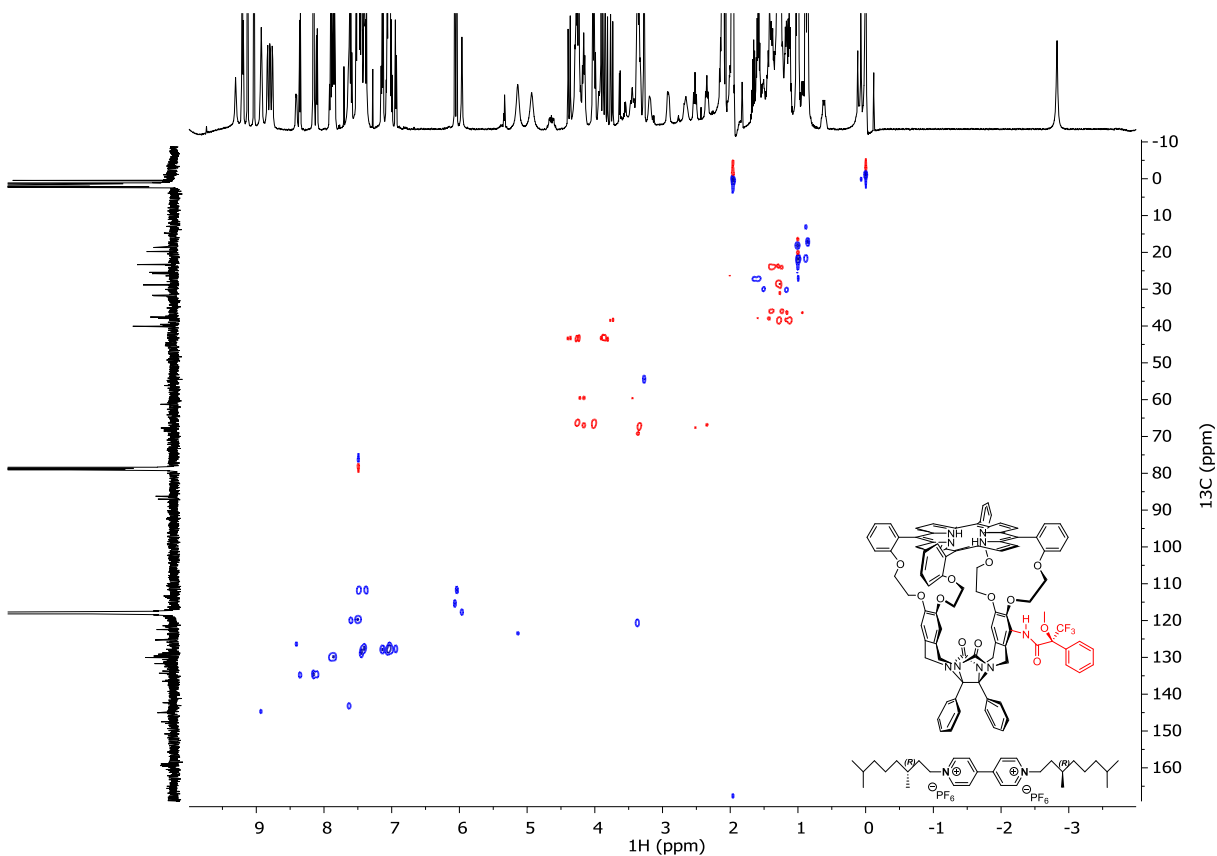

Figure S62.  $^1\text{H}$ - $^{13}\text{C}$  edited HSQC NMR spectrum (500 MHz, 298 K) of  $(R,R^*)$ -**H25** complex with  $(R,R)$ -**V2** in  $\text{CDCl}_3$ :  $\text{D}_3\text{CCN}$ , (1:1 v/v).  $\text{CH}_2$  groups are indicated in blue and  $\text{CH}/\text{CH}_3$  groups in red.

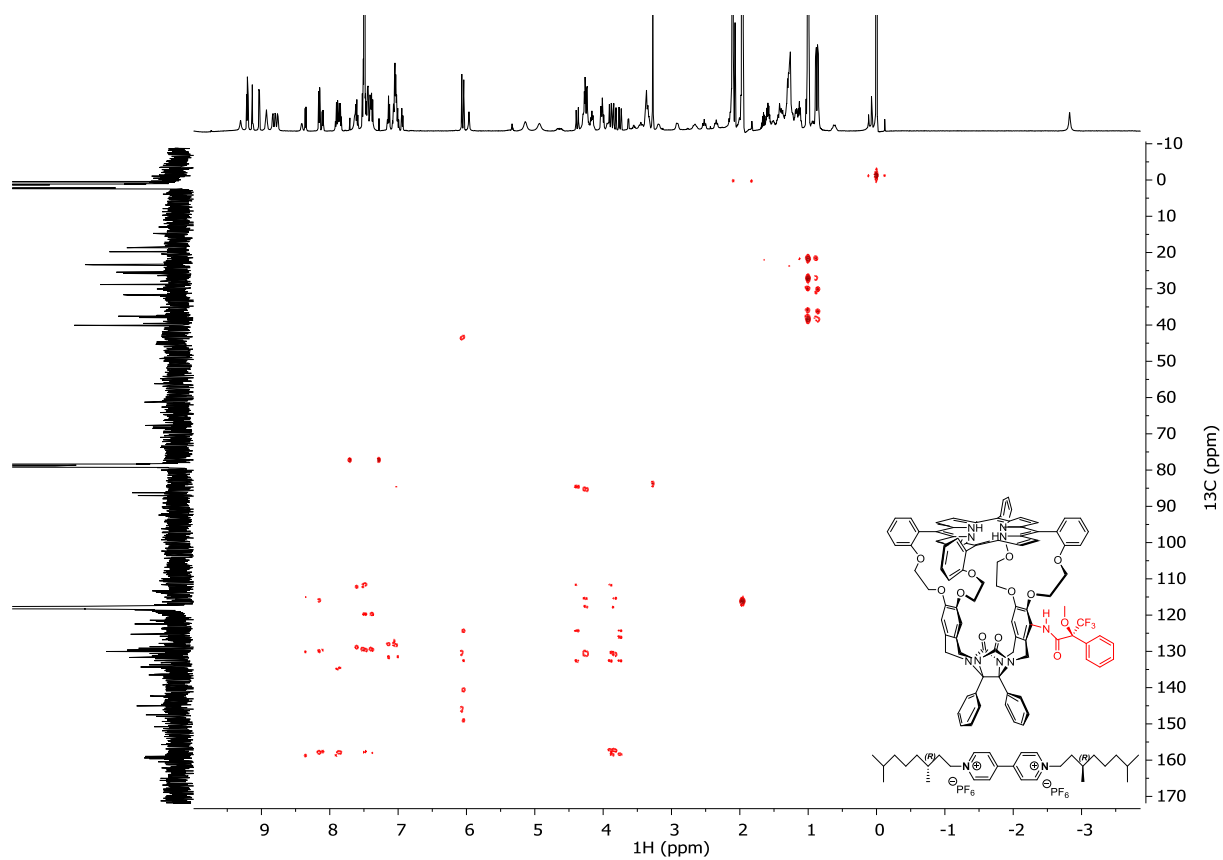

Figure S63.  $^1\text{H}$ - $^{13}\text{C}$  HMBC NMR spectrum (500 MHz, 298 K) of  $(R,R^*)$ -**H**<sub>25</sub> complex with  $(R,R)$ -**V**<sub>2</sub> in  $\text{CDCl}_3$ :  $\text{D}_3\text{CCN}$ , (1:1 v/v).

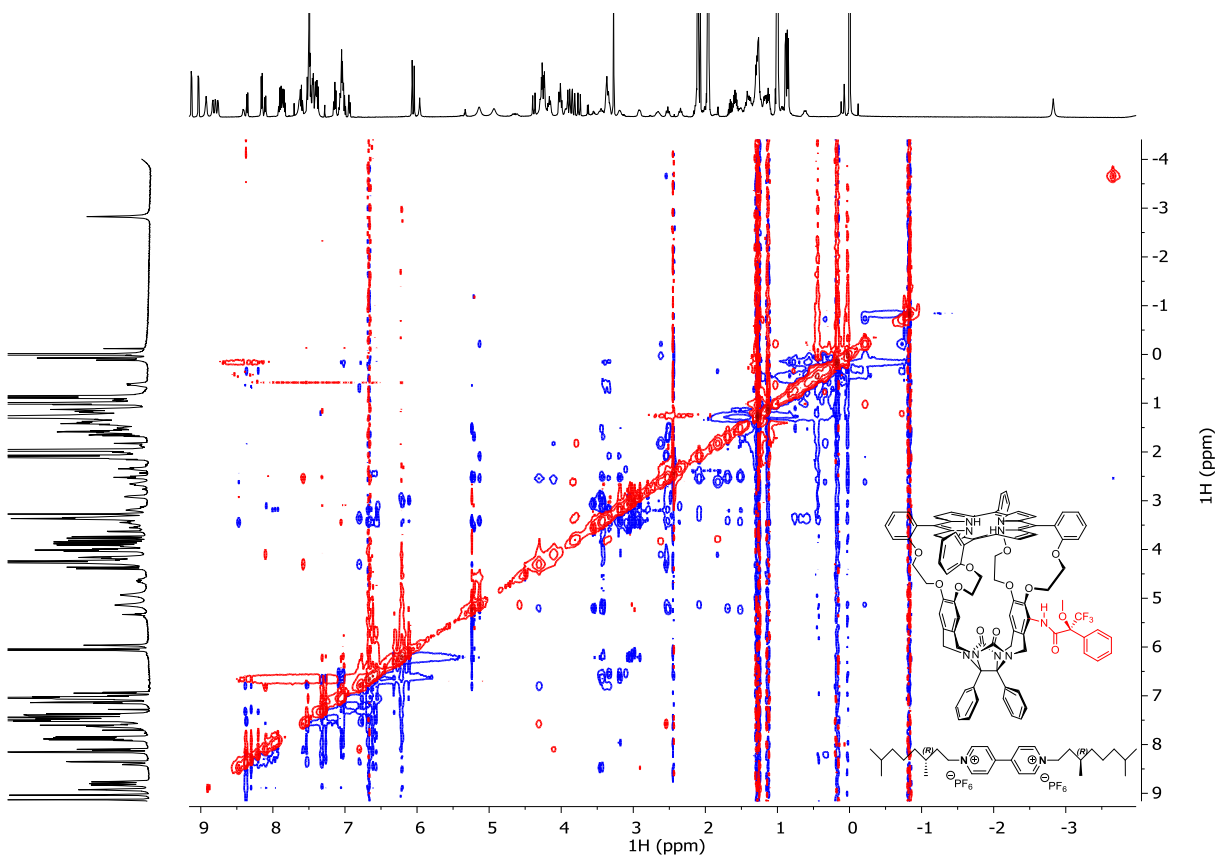

Figure S64.  $^1\text{H}$ - $^1\text{H}$  ROESY NMR spectrum (500 MHz, 298 K) of  $(R,R^*)$ -**H<sub>2</sub>5** complex with  $(R,R)$ -**V2** in  $\text{CDCl}_3$ :  $\text{D}_3\text{CCN}$ , (1:1 v/v).

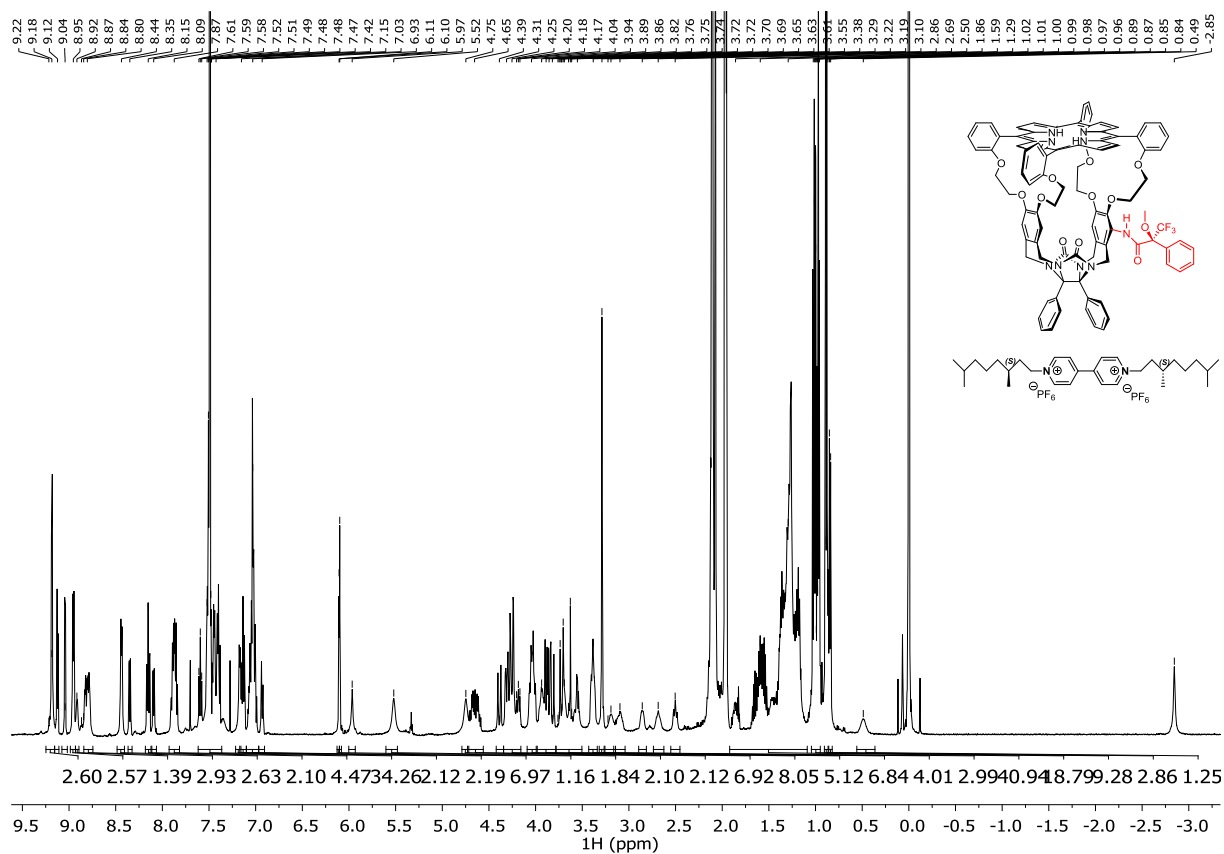

Figure S65.  $^1\text{H}$  NMR spectrum (500 MHz, 298 K) of  $(R,R^*)\text{-H}_2\mathbf{5}$  complex with  $(S,S)\text{-V2}$  in  $\text{CDCl}_3: \text{D}_3\text{CCN}$ , (1:1 v/v).

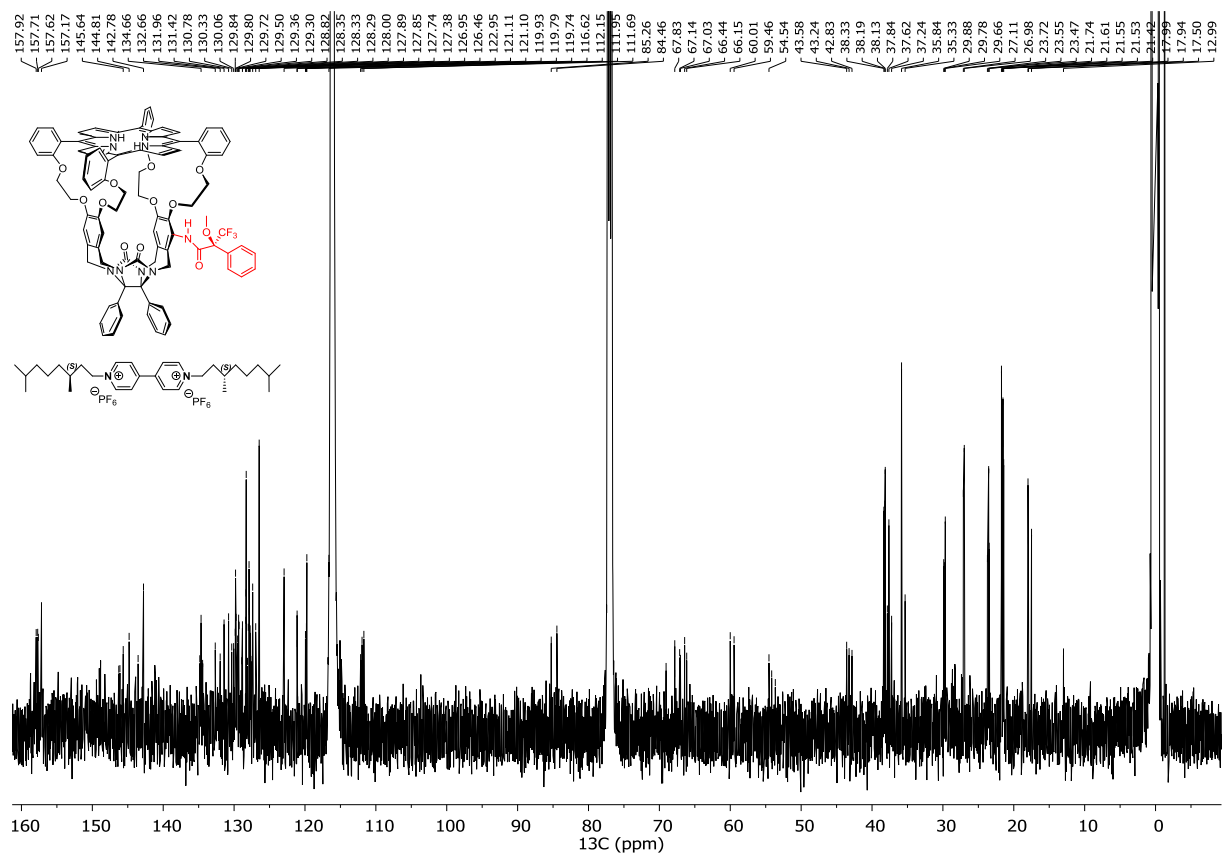

Figure S66.  $^{13}\text{C}\{^1\text{H}\}$  NMR spectrum (126 MHz, 298 K) of  $(R,R^*)\text{-H}_2\mathbf{5}$  complex with  $(S,S)\text{-V2}$  in  $\text{CDCl}_3:\text{D}_3\text{CCN}$ , (1:1 v/v).

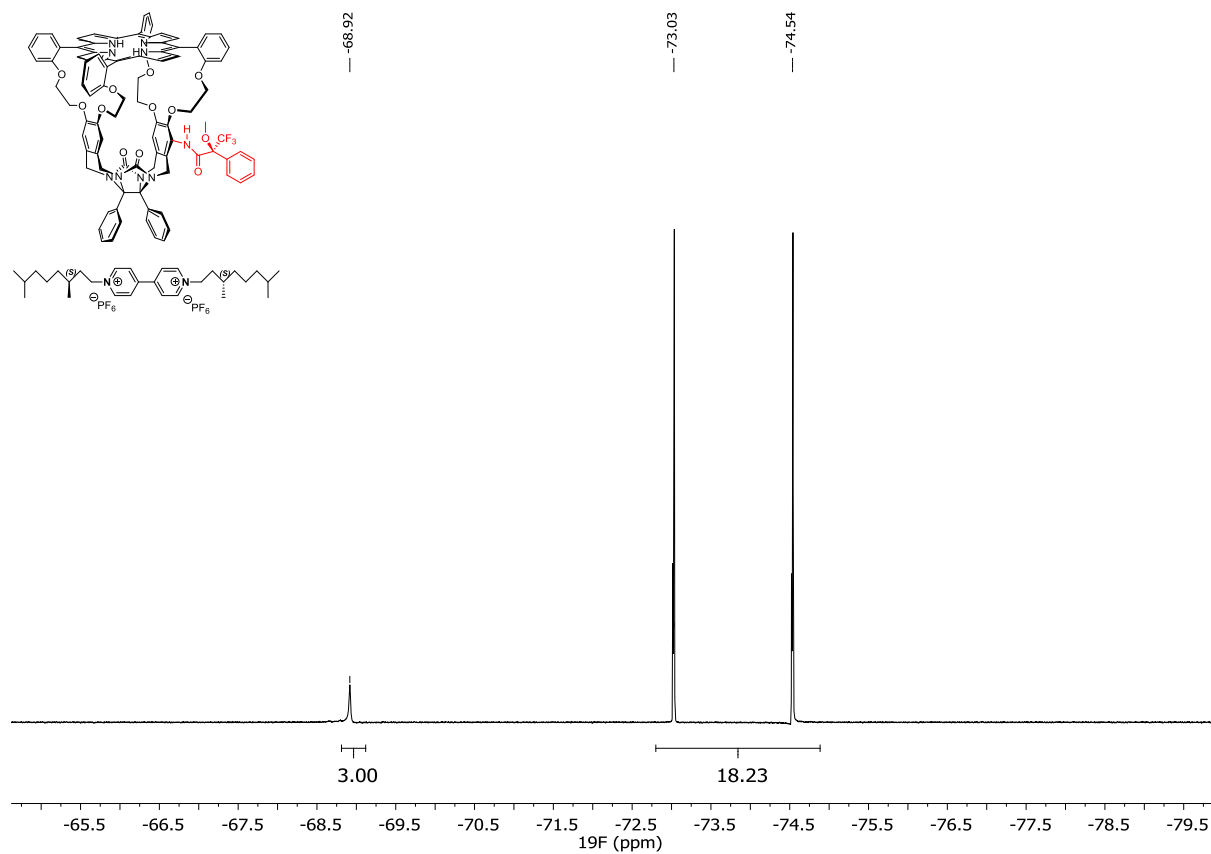

Figure S67.  $^{19}\text{F}$  NMR spectrum (471 MHz, 298 K) of  $(R,R^*)\text{-H}_25$  complex with  $(S,S)\text{-V2}$  in  $\text{CDCl}_3$ :  $\text{D}_3\text{CCN}$ , (1:1 v/v).

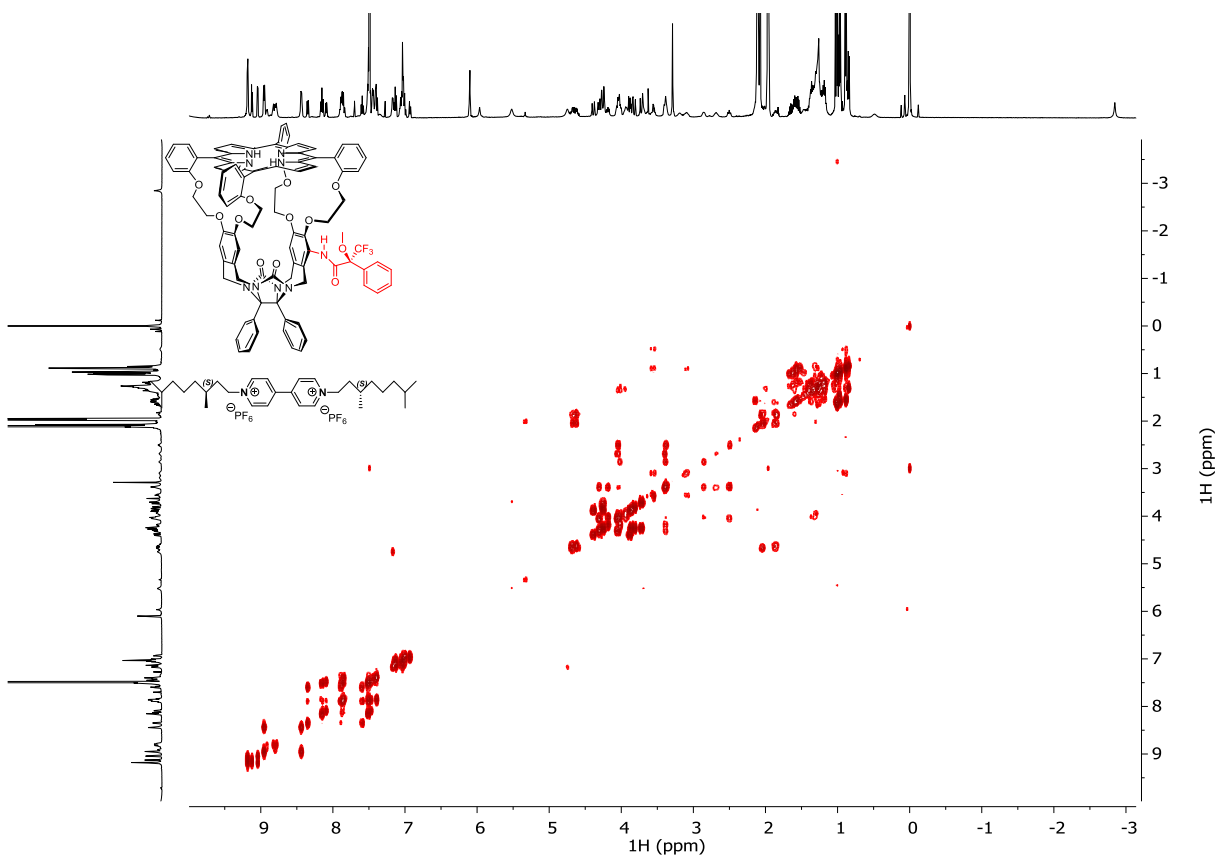

Figure S68.  $^1\text{H}$ - $^1\text{H}$  DQF-COSY NMR spectrum (500 MHz, 298 K) of  $(R,R^*)$ -**H<sub>2</sub>5** complex with  $(S,S)$ -**V2** in  $\text{CDCl}_3$ :  $\text{D}_3\text{CCN}$ , (1:1 v/v).



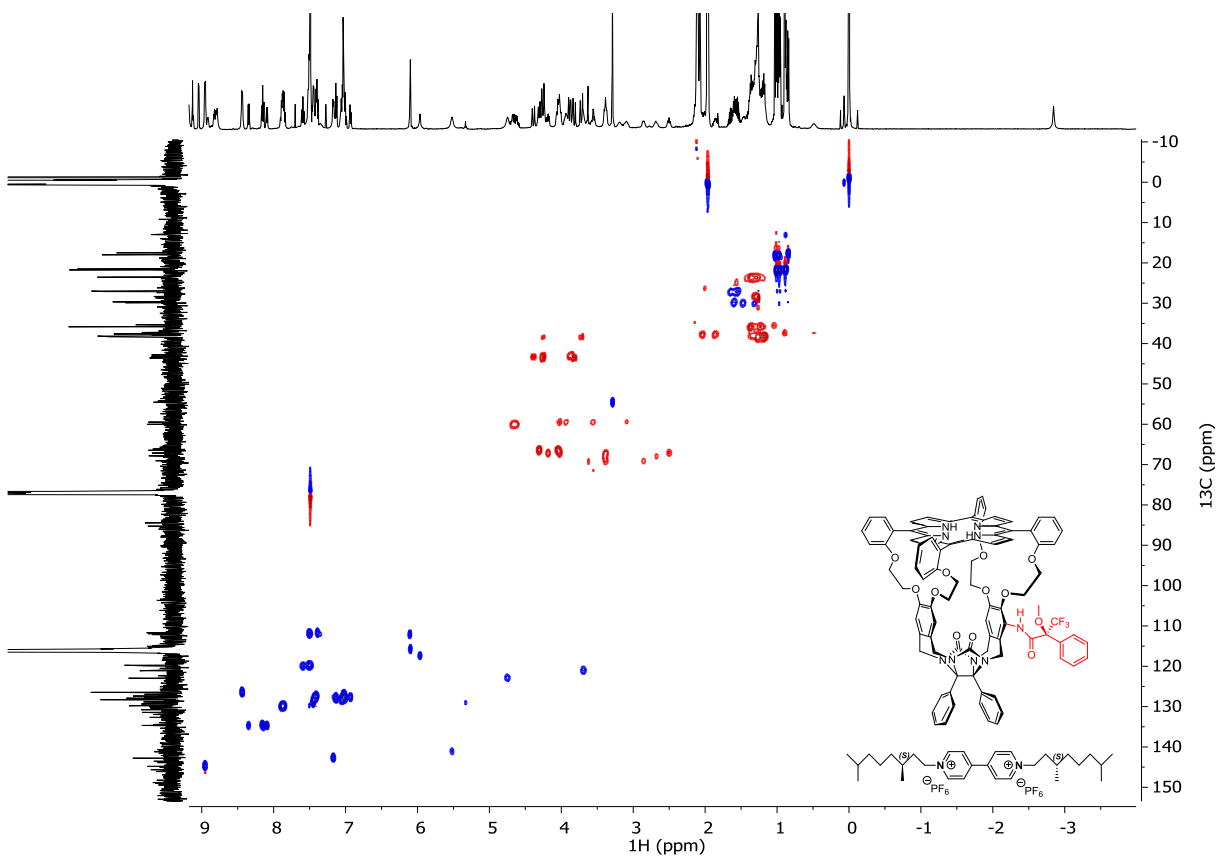

Figure S69. <sup>1</sup>H-<sup>13</sup>C edited HSQC NMR spectrum (500 MHz, 298 K) of (*R,R*\*)-**H<sub>2</sub>5** complex with (*S,S*)-**V2** in CDCl<sub>3</sub>: D<sub>3</sub>CCN, (1:1 v/v). CH<sub>2</sub> groups are indicated in blue and CH/CH<sub>3</sub> groups in red.

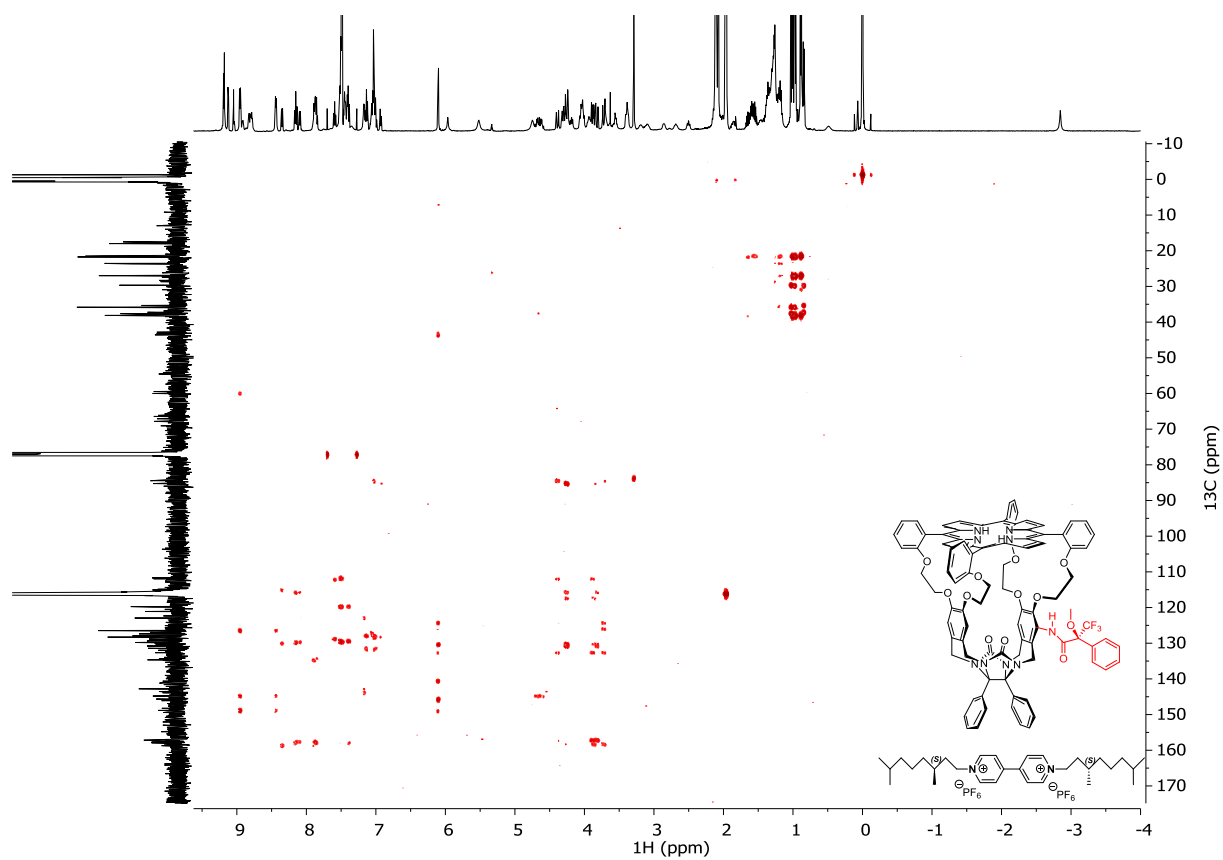

Figure S70.  $^1\text{H}$ - $^{13}\text{C}$  HMBC NMR spectrum (500 MHz, 298 K) of  $(R,R^*)$ -**H**<sub>2</sub>**5** complex with  $(S,S)$ -**V**<sub>2</sub> in  $\text{CDCl}_3$ :  $\text{D}_3\text{CCN}$ , (1:1 v/v).

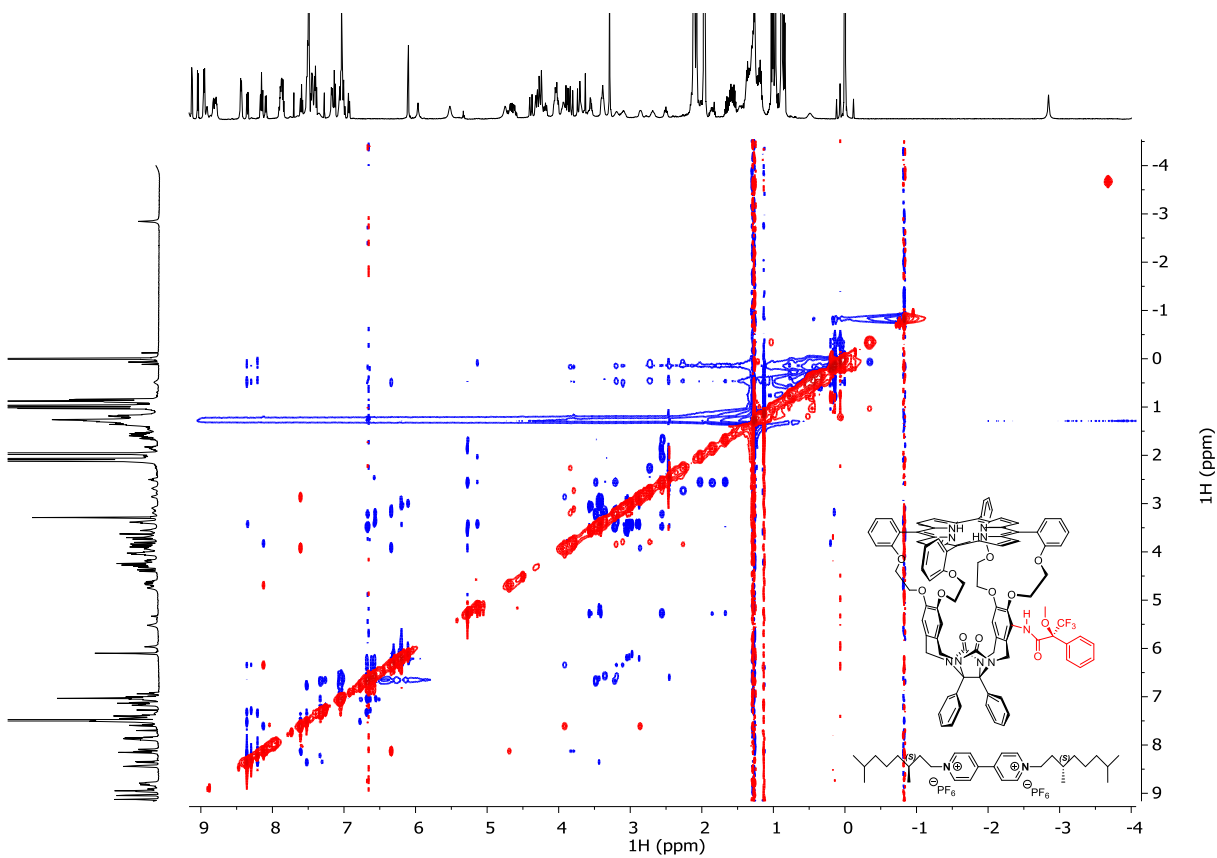

Figure S71.  $^1\text{H}$ - $^1\text{H}$  ROESY NMR spectrum (500 MHz, 298 K) of  $(R,R^*)$ -**H25** complex with  $(S,S)$ -**V2** in  $\text{CDCl}_3$ :  $\text{D}_3\text{CCN}$ , (1:1 v/v).

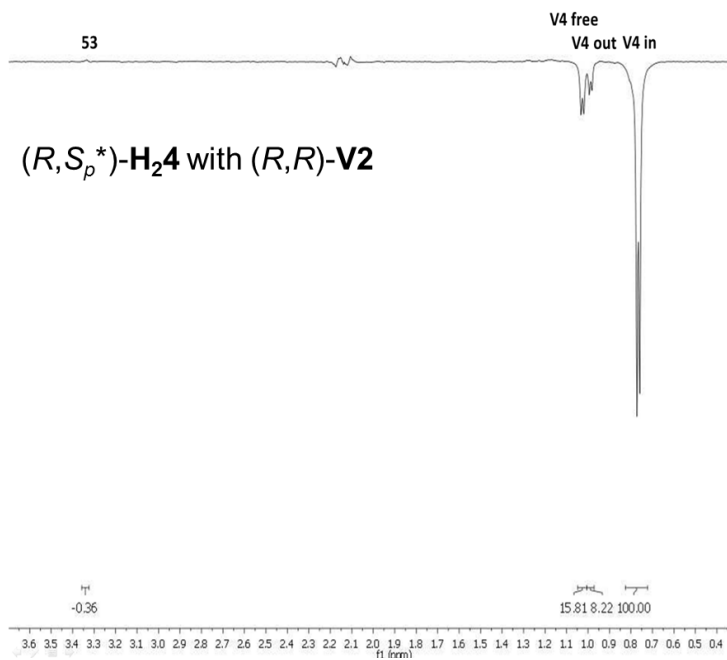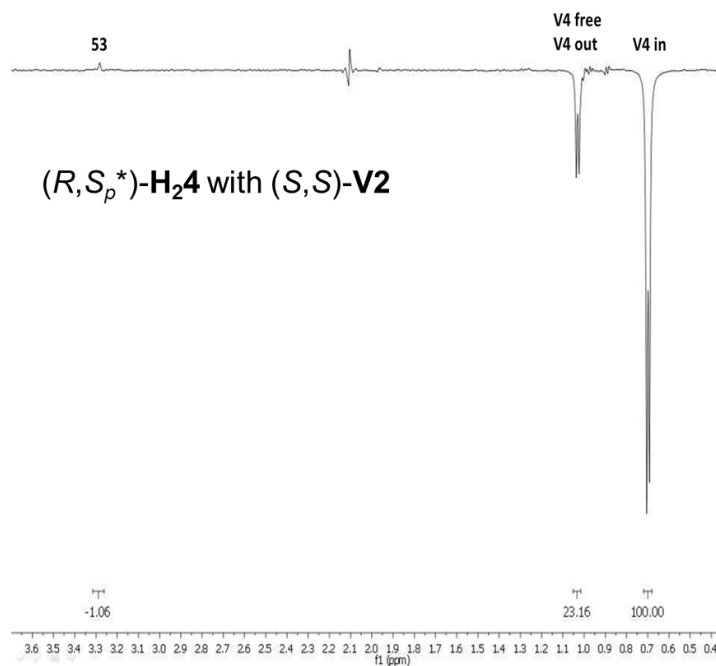

Figure S72. 1D-ROESY experiment in which protons V4 of guests  $(R,R)\text{-V2}$  and  $(S,S)\text{-V2}$  bound inside host  $(R,S_p^*)\text{-H}_2\mathbf{4}$  are excited. Most of the magnetization is transferred

to the  $V_4$  of the free guest due to chemical exchange. However, a small amount is transferred to the methoxy proton 53 of the Mosher substituent in  $(R,S_p^*)\text{-H}_2\mathbf{4}$ . In the case of  $(R,R)\text{-V}\mathbf{2}$  the magnetization transfer is 0.36% and in the case of  $(S,S)\text{-V}\mathbf{2}$  1.06%.  $V_{4in}$  are the methyl protons of the bound guest closest to the Mosher substituent and  $V_{4out}$  the methyl protons of the bound guest farthest away from this substituent.  $V_{4free}$  are the methyl protons of the unbound guest.

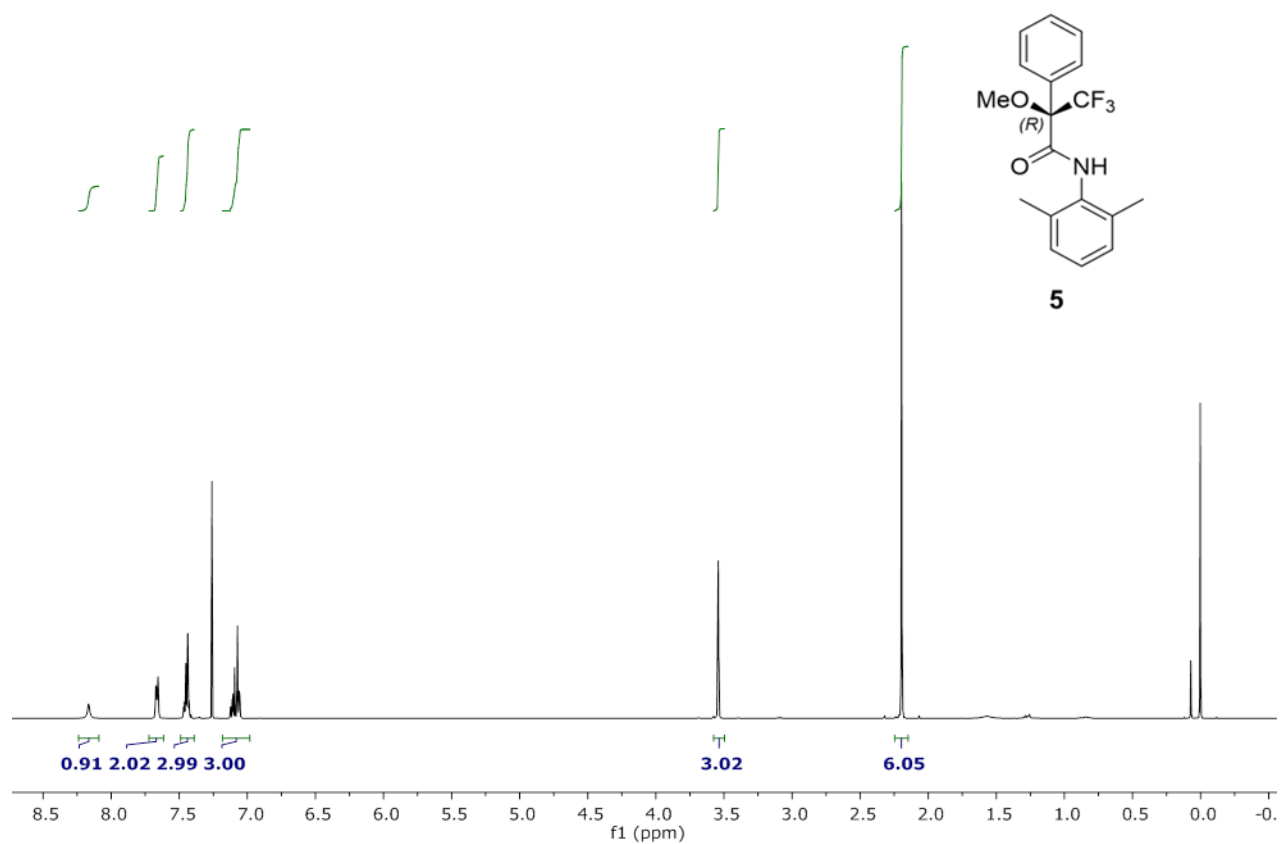

Figure S73. <sup>1</sup>H NMR spectrum of compound **5** in chloroform-d.

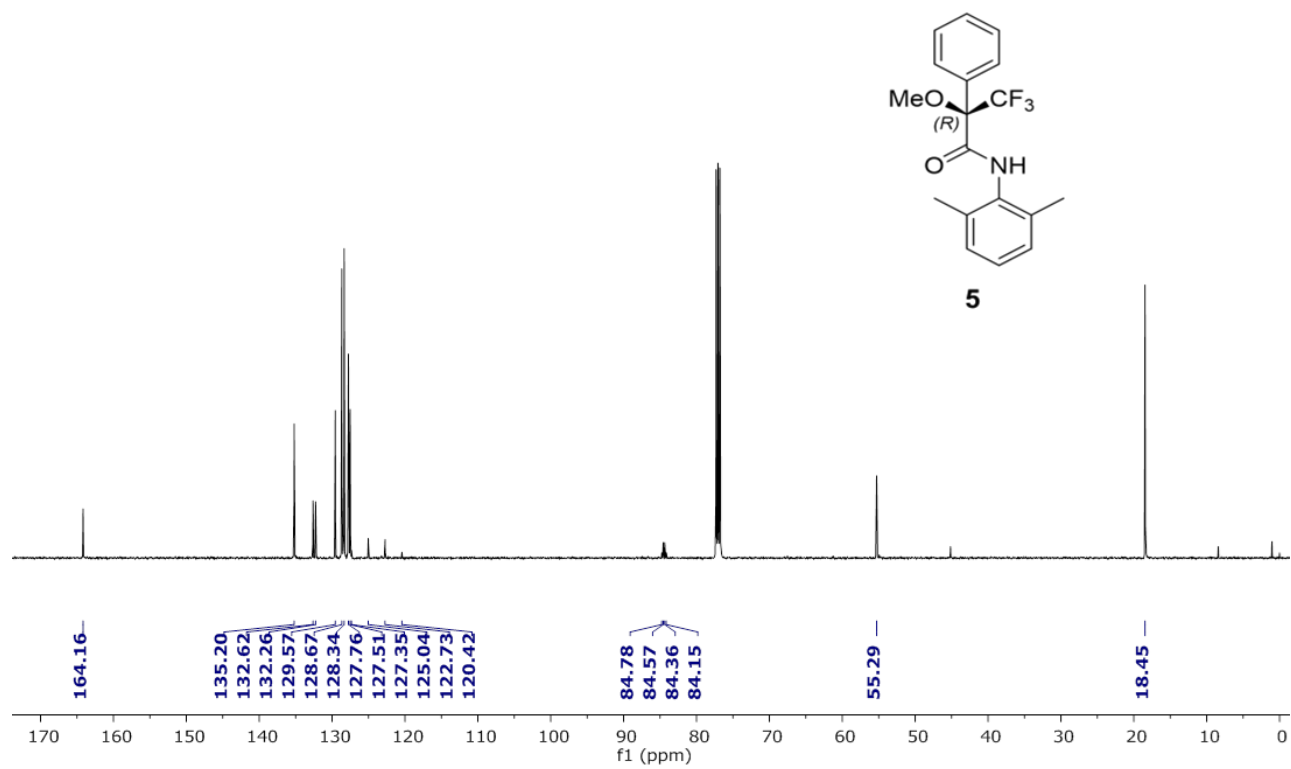

Figure S74.  $^{13}\text{C}$  NMR (126 MHz, chloroform-*d*) of compound **5**.

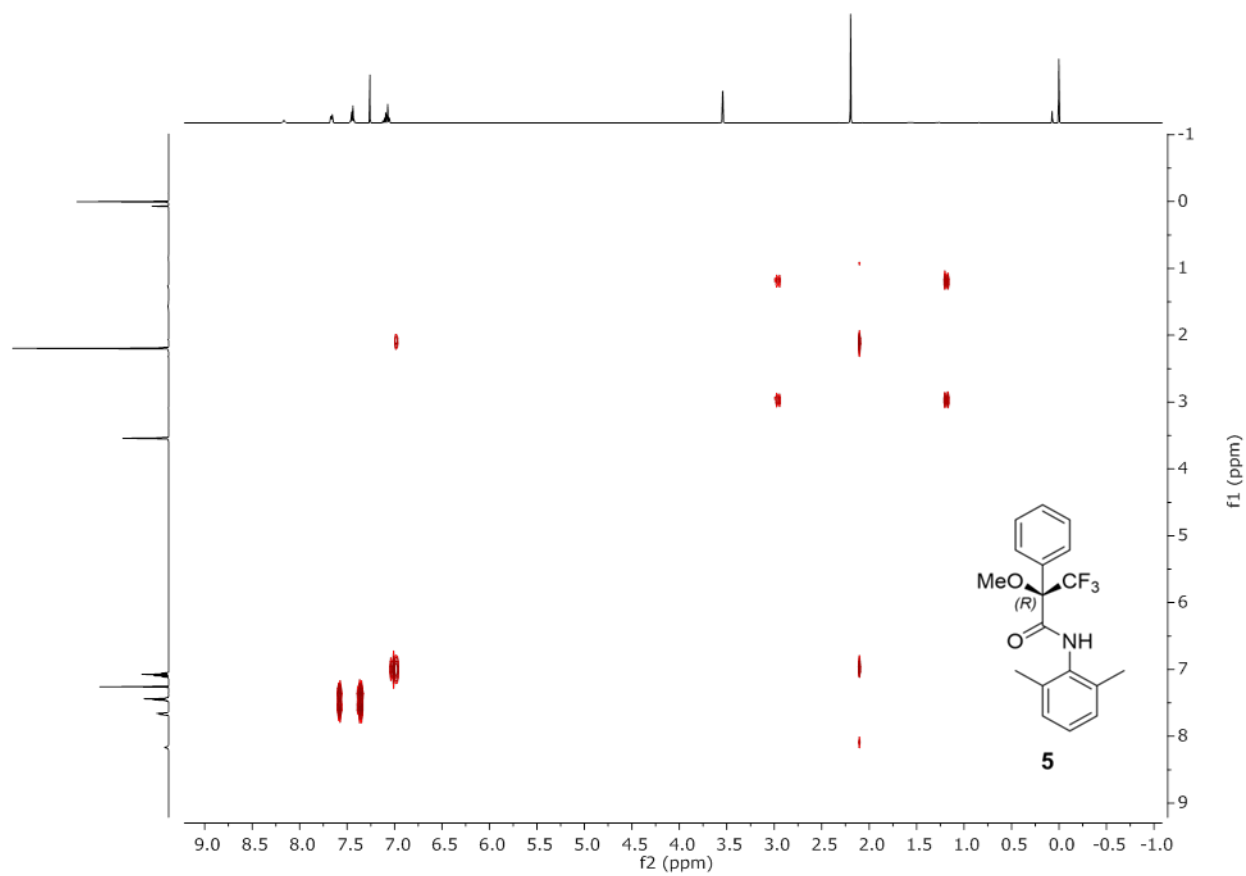

Figure S75.  $^1\text{H}$ - $^1\text{H}$  DQF-COSY NMR spectrum (500 MHz, 298 K) of compound **5** in chloroform-*d*.



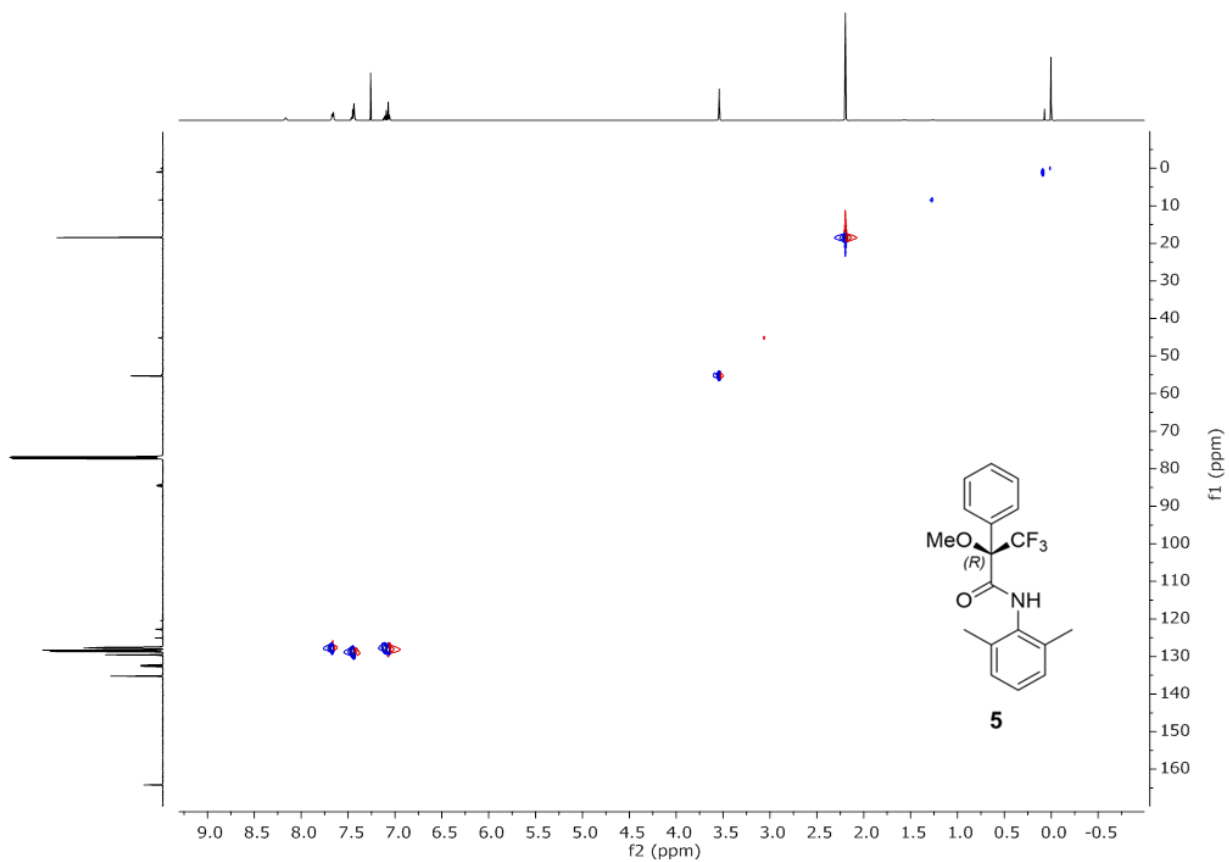

Figure S76.  $^1\text{H}$ - $^{13}\text{C}$  edited HSQC NMR spectrum (500 MHz, 298 K) of compound **5** in chloroform-*d*.  $\text{CH}_2$  groups are indicated in red and  $\text{CH}/\text{CH}_3$  groups in blue.

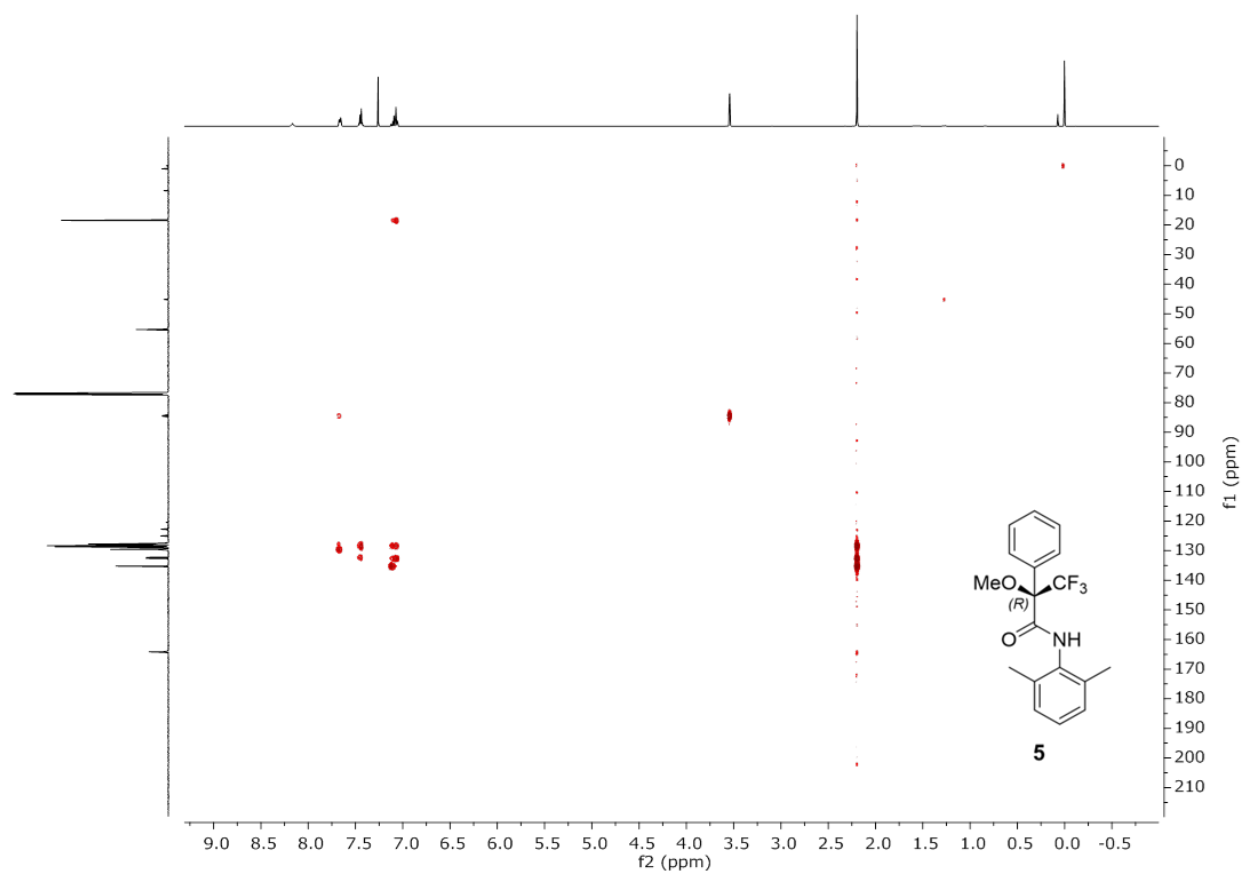

Figure S77.  $^1\text{H}$ - $^{13}\text{C}$  HMBC NMR spectrum (500 MHz, 298 K) of compound **5** in chloroform-*d*.
